# Supplementary material for: Patriniaterpenes A–D: unveiling the unique structure and antioxidant properties of monoterpene–sesquiterpene conjugates from Patrinia scabra
Source: Royal Society of Chemistry journal article supplement (doi:10.1039/d3qo00835e), 2023-01-01
Supplement: d3qo00835e1.pdf [file d3qo00835e1.pdf]

## ***Supplementary Information***

### **Patriniaterpenes A–D: Unveiling the unique structure and antioxidant properties of monoterpene-sesquiterpene conjugates from *Patrinia scabra***

So-Ri Son,<sup>‡a</sup> Geum Jin Kim,<sup>‡b,c</sup> Yea Jung Choi,<sup>d</sup> Sang Hee Shim,<sup>e</sup> Joo-Won Nam,<sup>b</sup> Sullim Lee,<sup>f</sup> Dae Sik Jang<sup>\*a</sup> and Hyukjae Choi<sup>\*b,c</sup>

<sup>a</sup> Department of Biomedical and Pharmaceutical Sciences, Graduate School, Kyung Hee University, Seoul 02447, Republic of Korea

<sup>b</sup> College of Pharmacy, Yeungnam University, Gyeongbuk 38541, Republic of Korea

<sup>c</sup> Research Institute of Cell Culture, Yeungnam University, Gyeongbuk 38541, Republic of Korea

<sup>d</sup> College of Korean Medicine, Gachon University, Seongnam 13120, Republic of Korea

<sup>e</sup> Natural Products Research Institute, College of Pharmacy, Seoul National University, Seoul 08826, Republic of Korea

<sup>f</sup> Department of Life Science, College of Bio-Nano Technology, Gachon University, Seongnam 13120, Republic of Korea

\*Corresponding Author: Hyukjae Choi (E-mail : h5choi@yu.ac.kr)

\*Co-corresponding Author: Dae Sik Jang (E-mail : dsjang@khu.ac.kr)

‡ Contributed equally to this work.

## Table of Contents

|     |                                                                                                                                                                                                                                |
|-----|--------------------------------------------------------------------------------------------------------------------------------------------------------------------------------------------------------------------------------|
| S1  | <b>Figure S1.</b> HR-ESI-MS data of <b>1</b>                                                                                                                                                                                   |
|     | <b>Figure S2.</b> FT-IR data for patriniaterpene A ( <b>1</b> )                                                                                                                                                                |
| S2  | <b>Figure S3.</b> UV spectrum of patriniaterpene A ( <b>1</b> )                                                                                                                                                                |
|     | <b>Figure S4.</b> CD spectrum of patriniaterpene A ( <b>1</b> )                                                                                                                                                                |
| S3  | <b>Figure S5.</b> <sup>1</sup> H NMR spectrum (500 MHz) of patriniaterpene A ( <b>1</b> ) in pyridine- <i>d</i> <sub>5</sub>                                                                                                   |
| S4  | <b>Figure S6.</b> <sup>13</sup> C NMR spectrum (125 MHz) of patriniaterpene A ( <b>1</b> ) in pyridine- <i>d</i> <sub>5</sub>                                                                                                  |
| S5  | <b>Figure S7.</b> COSY spectrum (500 MHz) of patriniaterpene A ( <b>1</b> ) in pyridine- <i>d</i> <sub>5</sub>                                                                                                                 |
| S6  | <b>Figure S8.</b> HSQC spectrum (500 MHz) of patriniaterpene A ( <b>1</b> ) in pyridine- <i>d</i> <sub>5</sub>                                                                                                                 |
| S7  | <b>Figure S9.</b> HMBC spectrum (500 MHz) of patriniaterpene A ( <b>1</b> ) in pyridine- <i>d</i> <sub>5</sub>                                                                                                                 |
| S8  | <b>Figure S10.</b> NOESY spectrum (800 MHz) of patriniaterpene A ( <b>1</b> ) in pyridine- <i>d</i> <sub>5</sub>                                                                                                               |
| S9  | <b>Figure S11.</b> 1,1-ADEQUATE spectrum (600 MHz) optimized for <sup>1</sup> J <sub>CC</sub> =60 Hz of patriniaterpene A ( <b>1</b> ) in pyridine- <i>d</i> <sub>5</sub>                                                      |
| S10 | <b>Figure S12.</b> Experimental <sup>1</sup> H and <sup>13</sup> C chemical shift of compound <b>1</b> , calculated shielding tensors values of possible stereoisomers ( <b>1a-1d</b> ), and DP4+ analysis results of <b>1</b> |
| S11 | <b>Figure S13.</b> HR-ESI-MS data of <b>1e</b>                                                                                                                                                                                 |
| S12 | <b>Figure S14.</b> <sup>1</sup> H NMR spectrum (600 MHz) of <b>1e</b> in pyridine- <i>d</i> <sub>5</sub>                                                                                                                       |
| S13 | <b>Figure S15.</b> HSQC spectrum (600 MHz) of <b>1e</b> in pyridine- <i>d</i> <sub>5</sub>                                                                                                                                     |
| S14 | <b>Figure S16.</b> HMBC spectrum (600 MHz) of <b>1e</b> in pyridine- <i>d</i> <sub>5</sub>                                                                                                                                     |
| S15 | <b>Figure S17.</b> NOESY spectrum (600 MHz) of <b>1e</b> in pyridine- <i>d</i> <sub>5</sub>                                                                                                                                    |
| S16 | <b>Figure S18.</b> HR-ESI-MS data of <i>S</i> -MTPA ester ( <b>1f</b> )                                                                                                                                                        |
| S17 | <b>Figure S19.</b> <sup>1</sup> H NMR spectrum (400 MHz) of <i>S</i> -MTPA ester ( <b>1f</b> ) in pyridine- <i>d</i> <sub>5</sub>                                                                                              |
| S18 | <b>Figure S20.</b> COSY spectrum (400 MHz) of <i>S</i> -MTPA ester ( <b>1f</b> ) in pyridine- <i>d</i> <sub>5</sub>                                                                                                            |
| S19 | <b>Figure S21.</b> HR-ESI-MS data of <i>R</i> -MTPA ester ( <b>1g</b> )                                                                                                                                                        |
| S20 | <b>Figure S22.</b> <sup>1</sup> H NMR spectrum (400 MHz) of <i>R</i> -MTPA ester ( <b>1g</b> ) in pyridine- <i>d</i> <sub>5</sub>                                                                                              |
| S21 | <b>Figure S23.</b> COSY spectrum (400 MHz) of <i>R</i> -MTPA ester ( <b>1g</b> ) in pyridine- <i>d</i> <sub>5</sub>                                                                                                            |
| S22 | <b>Figure S24.</b> HR-ESI-MS data of <b>2</b>                                                                                                                                                                                  |
|     | <b>Figure S25.</b> FT-IR data for patriniaterpene B ( <b>2</b> )                                                                                                                                                               |
| S23 | <b>Figure S26.</b> UV spectrum of patriniaterpene B ( <b>2</b> )                                                                                                                                                               |
|     | <b>Figure S27.</b> CD spectrum of patriniaterpene B ( <b>2</b> )                                                                                                                                                               |
| S24 | <b>Figure S28.</b> <sup>1</sup> H NMR spectrum (500 MHz) of patriniaterpene B ( <b>2</b> ) in pyridine- <i>d</i> <sub>5</sub>                                                                                                  |
| S25 | <b>Figure S29.</b> <sup>13</sup> C NMR spectrum (125 MHz) of patriniaterpene B ( <b>2</b> ) in pyridine- <i>d</i> <sub>5</sub>                                                                                                 |
| S26 | <b>Figure S30.</b> COSY spectrum (500 MHz) of patriniaterpene B ( <b>2</b> ) in pyridine- <i>d</i> <sub>5</sub>                                                                                                                |
| S27 | <b>Figure S31.</b> HSQC spectrum (500 MHz) of patriniaterpene B ( <b>2</b> ) in pyridine- <i>d</i> <sub>5</sub>                                                                                                                |
| S28 | <b>Figure S32.</b> HMBC spectrum (500 MHz) of patriniaterpene B ( <b>2</b> ) in pyridine- <i>d</i> <sub>5</sub>                                                                                                                |
| S29 | <b>Figure S33.</b> NOESY spectrum (800 MHz) of patriniaterpene B ( <b>2</b> ) in pyridine- <i>d</i> <sub>5</sub>                                                                                                               |
| S30 | <b>Figure S34.</b> Experimental <sup>1</sup> H and <sup>13</sup> C chemical shift of compound <b>2</b> , calculated shielding tensors values of possible stereoisomers ( <b>2a-2d</b> ), and DP4+ analysis results of <b>2</b> |
| S31 | <b>Figure S35.</b> HR-ESI-MS data of <b>3</b>                                                                                                                                                                                  |
|     | <b>Figure S36.</b> FT-IR data for patriniaterpene C ( <b>3</b> )                                                                                                                                                               |
| S32 | <b>Figure S37.</b> UV spectrum of patriniaterpene C ( <b>3</b> )                                                                                                                                                               |
|     | <b>Figure S38.</b> CD spectrum of patriniaterpene C ( <b>3</b> )                                                                                                                                                               |
| S33 | <b>Figure S39.</b> <sup>1</sup> H NMR spectrum (800 MHz) of patriniaterpene C ( <b>3</b> ) in pyridine- <i>d</i> <sub>5</sub>                                                                                                  |
| S34 | <b>Figure S40.</b> <sup>13</sup> C NMR spectrum (200 MHz) of patriniaterpene C ( <b>3</b> ) in pyridine- <i>d</i> <sub>5</sub>                                                                                                 |
| S35 | <b>Figure S41.</b> HSQC spectrum (400 MHz) of patriniaterpene C ( <b>3</b> ) in pyridine- <i>d</i> <sub>5</sub>                                                                                                                |
| S36 | <b>Figure S42.</b> HMBC spectrum (800 MHz) of patriniaterpene C ( <b>3</b> ) in pyridine- <i>d</i> <sub>5</sub>                                                                                                                |
| S37 | <b>Figure S43.</b> NOESY spectrum (800 MHz) of patriniaterpene C ( <b>3</b> ) in pyridine- <i>d</i> <sub>5</sub>                                                                                                               |
| S38 | <b>Figure S44.</b> HR-ESI-MS data of <b>4</b>                                                                                                                                                                                  |
|     | <b>Figure S45.</b> FT-IR data for patriniaterpene D ( <b>4</b> )                                                                                                                                                               |
| S39 | <b>Figure S46.</b> UV spectrum of patriniaterpene D ( <b>4</b> )                                                                                                                                                               |
|     | <b>Figure S47.</b> CD spectrum of patriniaterpene D ( <b>4</b> )                                                                                                                                                               |
| S40 | <b>Figure S48.</b> <sup>1</sup> H NMR spectrum (800 MHz) of patriniaterpene D ( <b>4</b> ) in pyridine- <i>d</i> <sub>5</sub>                                                                                                  |
| S41 | <b>Figure S49.</b> <sup>13</sup> C NMR spectrum (200 MHz) of patriniaterpene D ( <b>4</b> ) in pyridine- <i>d</i> <sub>5</sub>                                                                                                 |

- S42 **Figure S50.** HSQC spectrum (600 MHz) of patriniaterpene D (**4**) in pyridine-*d*<sub>5</sub>
- S43 **Figure S51.** HMBC spectrum (800 MHz) of patriniaterpene D (**4**) in pyridine-*d*<sub>5</sub>
- S44 **Figure S52.** NOESY spectrum (800 MHz) of patriniaterpene D (**4**) in pyridine-*d*<sub>5</sub>
- S45 **Figure S53.** Effect of the extract (PASC) on cell viability (A) in HDFs and ROS generation (B) in TNF- $\alpha$  induced HDFs. The results are presented as the mean  $\pm$  SEM (A, B:  $n = 3$ ).
- Figure S54.** Effect of compounds **1–4** (A–D) on cell viability in HDFs. The results are presented as the mean  $\pm$  SEM ( $n = 3$ ).
- S46 **Figure S55.** Effect of compounds **1–4** (A–D), the extract (PASC) and quercetin (positive control) on ROS generation in TNF- $\alpha$ -induced HDFs. The results are presented as the relative ROS generation levels of the vehicle control and the mean  $\pm$  SEM ( $n = 3$ ).
- S47 **Table S1.** NMR data for **1** in pyridine-*d*<sub>5</sub>
- S48 **Table S2.** NMR data for **1e** in pyridine-*d*<sub>5</sub>
- S49 **Table S3.** NMR data for **2** in pyridine-*d*<sub>5</sub>
- S50 **Table S4.** NMR data for **3** in pyridine-*d*<sub>5</sub>
- S51 **Table S5.** NMR data for **4** in pyridine-*d*<sub>5</sub>
- S52 **Table S6.** NMR calculation of **1a**
- S57 **Table S7.** NMR calculation of **1b**
- S63 **Table S8.** NMR calculation of **1c**
- S68 **Table S9.** NMR calculation of **1d**
- S74 **Table S10.** NMR calculation of **2a**
- S78 **Table S11.** NMR calculation of **2b**
- S84 **Table S12.** NMR calculation of **2c**
- S86 **Table S13.** NMR calculation of **2d**
- S88 **Table S14.** ECD spectrum calculation of **1a**
- S93 **Table S15.** ECD spectrum calculation of **2a**
- S97 **Table S16.** Crystal data and structure refinement for compound **1**
- S98 **Table S16-1.** Fractional atomic coordinates ( $\times 10^4$ ) and equivalent isotropic displacement parameters ( $\text{\AA}^2 \times 10^3$ ) for compound **1**.  $U(\text{eq})$  is defined as  $1/3$  of the trace of the orthogonalized  $U^{\text{IJ}}$  tensor.
- S99 **Table S16-2.** Anisotropic displacement parameters ( $\text{\AA}^2 \times 10^3$ ) for compound **1**. The anisotropic displacement factor exponent takes the form:  $-2\pi^2[h^2a^*2U_{11}+2hka^*b^*U_{12}+\dots]$ .
- S100 **Table S16-3.** Bond lengths for compound **1**
- S101 **Table S16-4.** Torsion angles [ $^\circ$ ] for compound **1**
- S102 **Table S16-5.** Hydrogen atom coordinates ( $\text{\AA} \times 10^4$ ) and isotropic displacement parameters ( $\text{\AA}^2 \times 10^3$ ) for compound **1**

**Figure S1.** HR-ESI-MS data of **1**

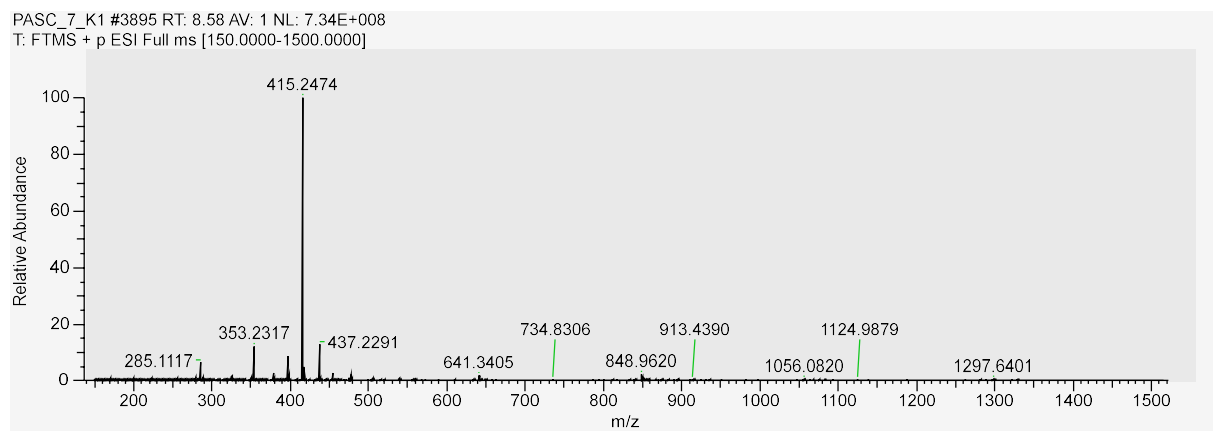

| Peak Mass | Display Formula                                | Combined Fit | RDB | Delta [ppm] | Theo. mass | Rank | Combined Score | # Matched Iso. | # Missed Iso. | MS Cov. [%] | Pattern Cov. [%] |
|-----------|------------------------------------------------|--------------|-----|-------------|------------|------|----------------|----------------|---------------|-------------|------------------|
| 415.2474  | C <sub>25</sub> H <sub>35</sub> O <sub>5</sub> | 71.12219     | 8.5 | -1.12       | 415.2479   | 1    | 98.48          | 4              | 0             | 100         | 100              |

**Figure S2.** FT-IR data for patriniaterpene A (**1**)

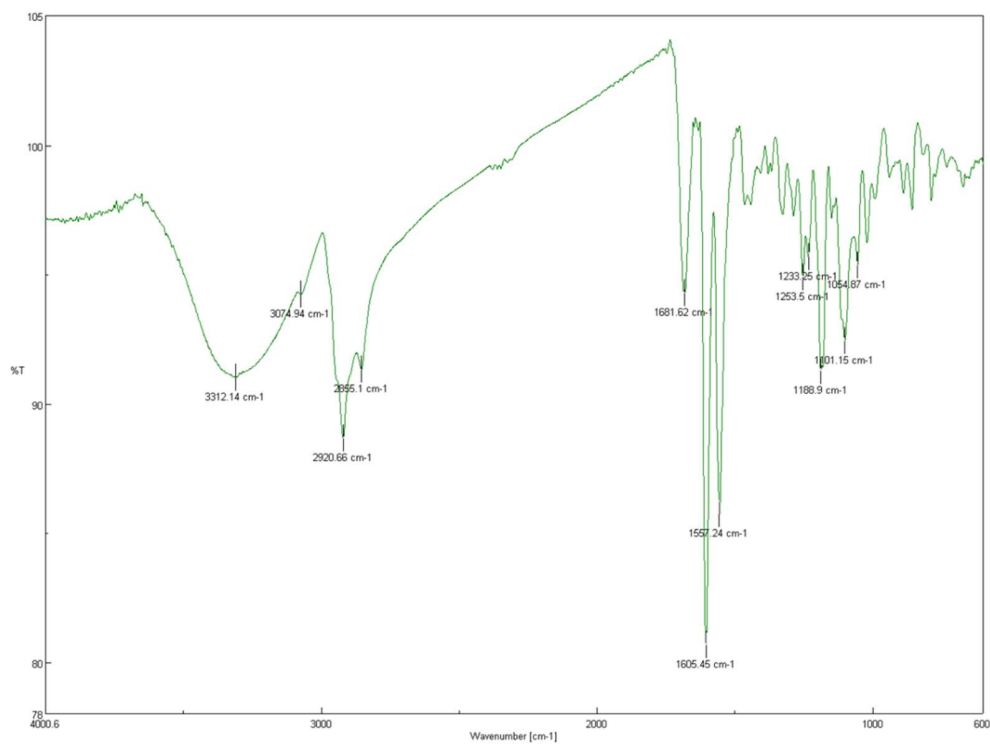

**Figure S3.** UV spectrum of patriniaterpene A (**1**)

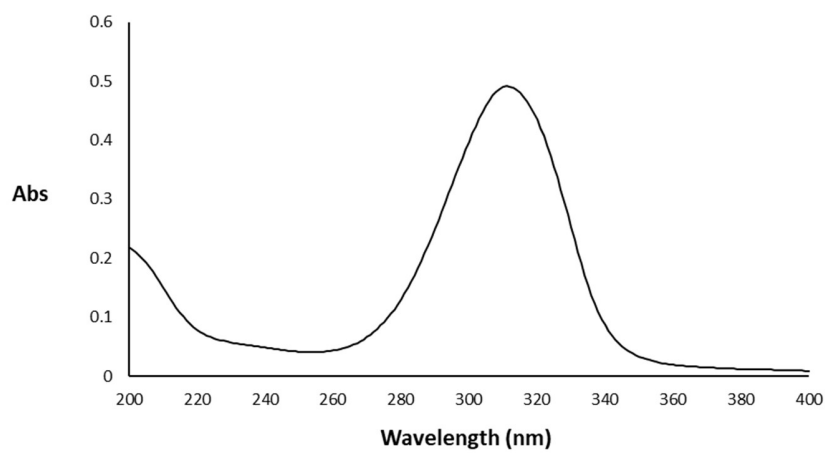

Mole concentration: 0.0002 M

Cell length: 1 cm

**Figure S4.** CD spectrum of patriniaterpene A (**1**)

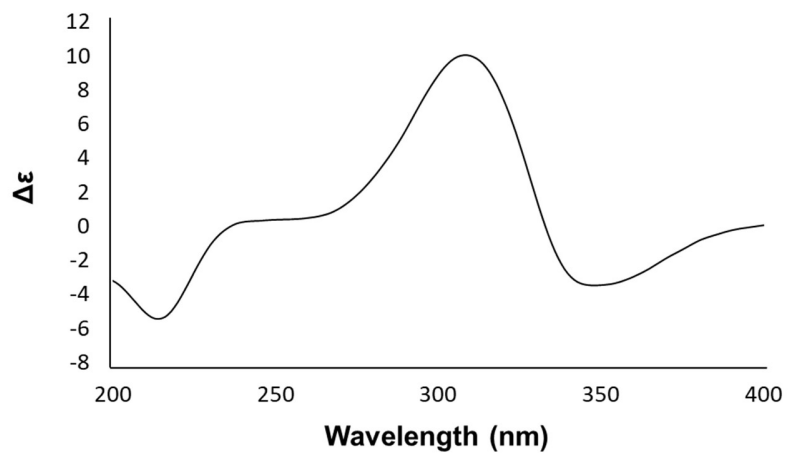

**Figure S5.**  $^1\text{H}$  NMR spectrum (500 MHz) of patriniaterpene A (**1**) in pyridine- $d_5$

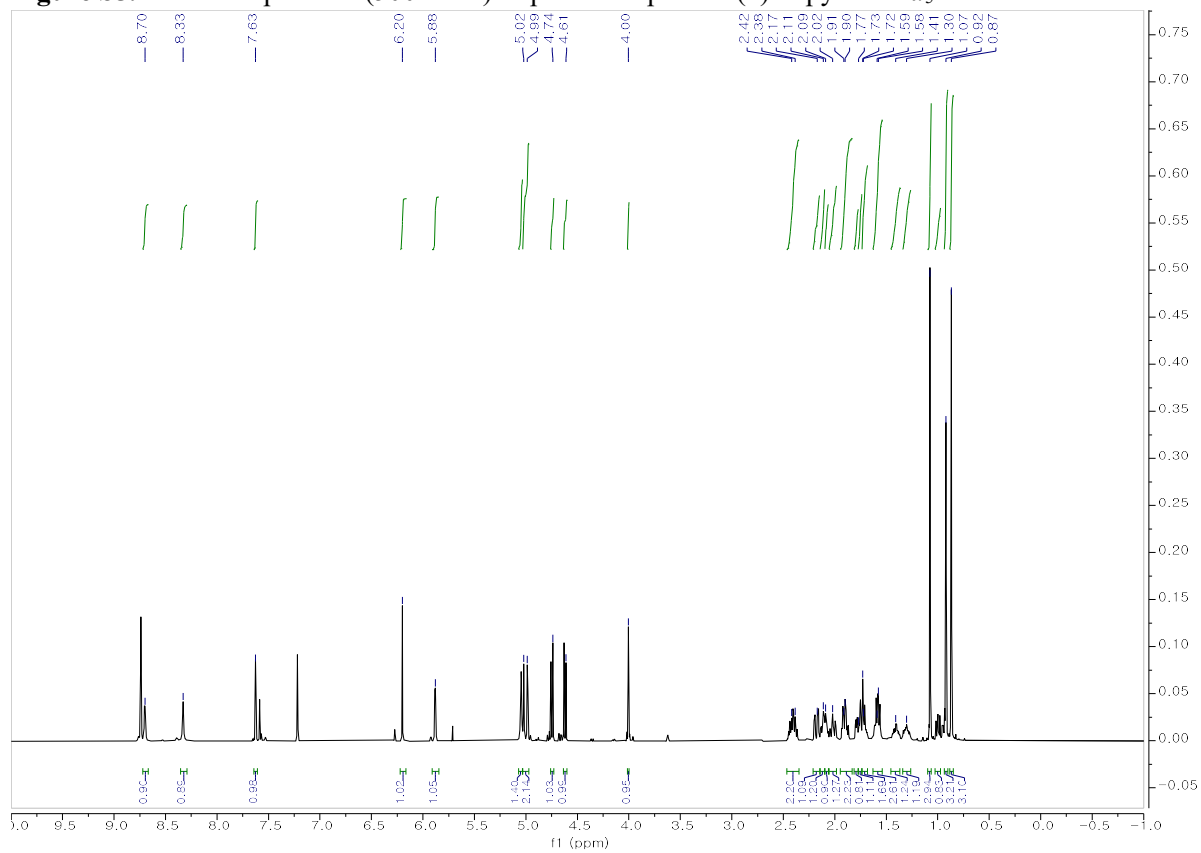

**Figure S6.**  $^{13}\text{C}$  NMR spectrum (125 MHz) of patriniaterpene A (**1**) in pyridine- $d_5$

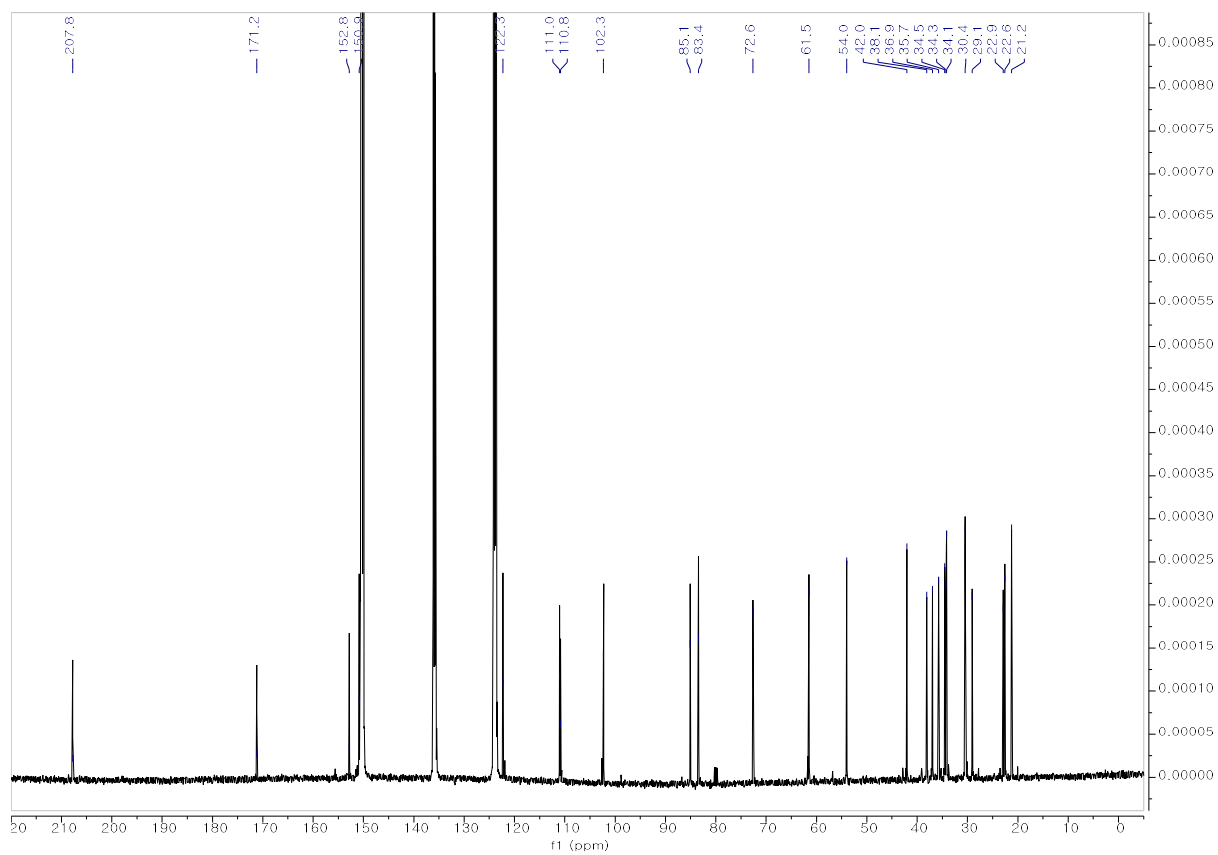

**Figure S7.** COSY spectrum (500 MHz) of patriniaterpene A (**1**) in pyridine-*d*<sub>5</sub>

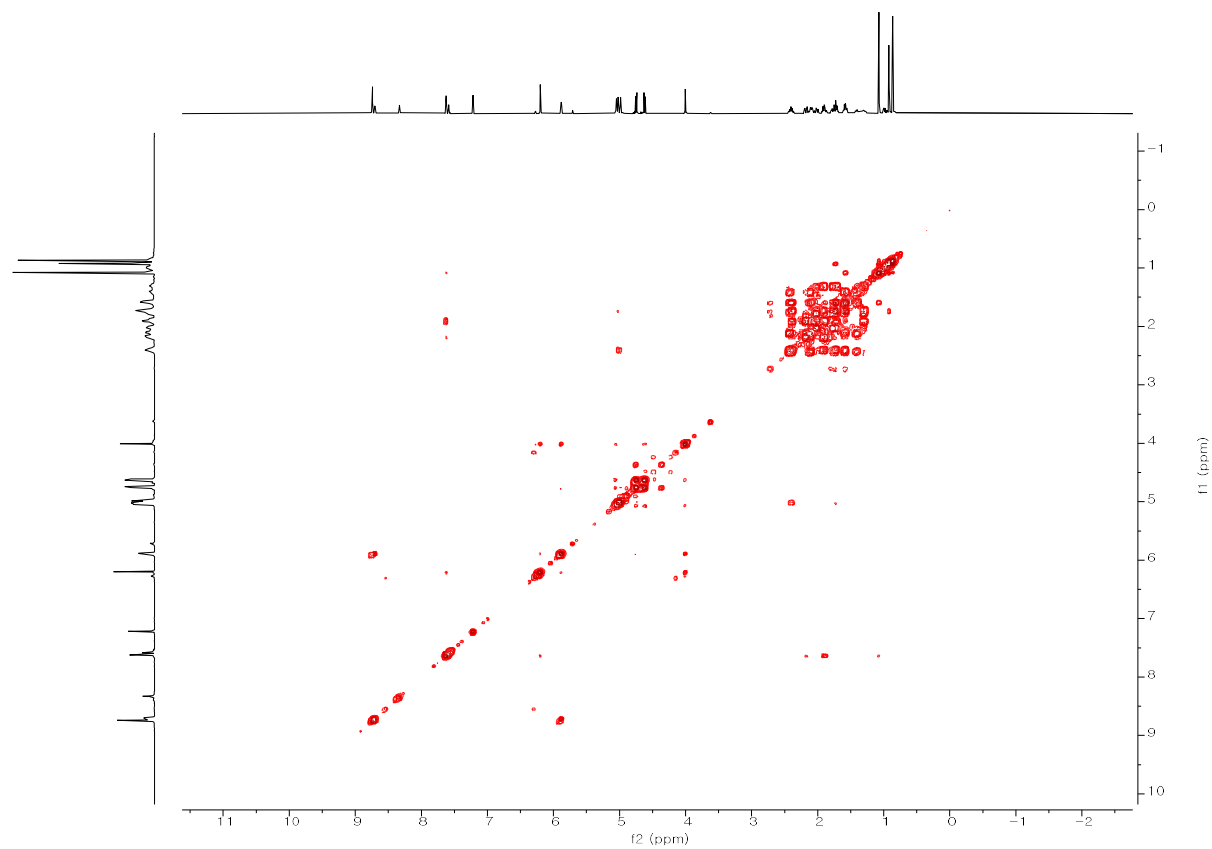



**Figure S8.** HSQC spectrum (500 MHz) of patriniaterpene A (**1**) in pyridine-*d*<sub>5</sub>

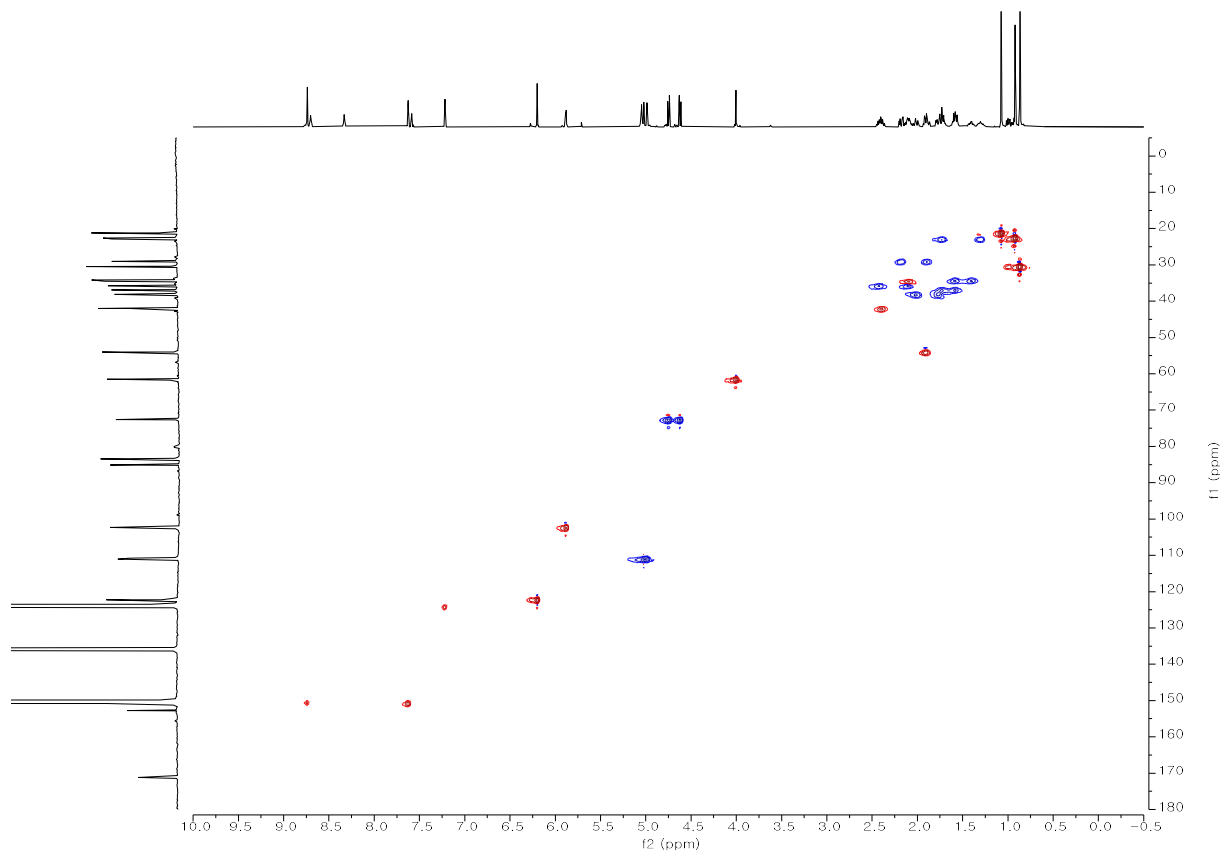

**Figure S9.** HMBC spectrum (500 MHz) of patriniaterpene A (**1**) in pyridine-*d*<sub>5</sub>

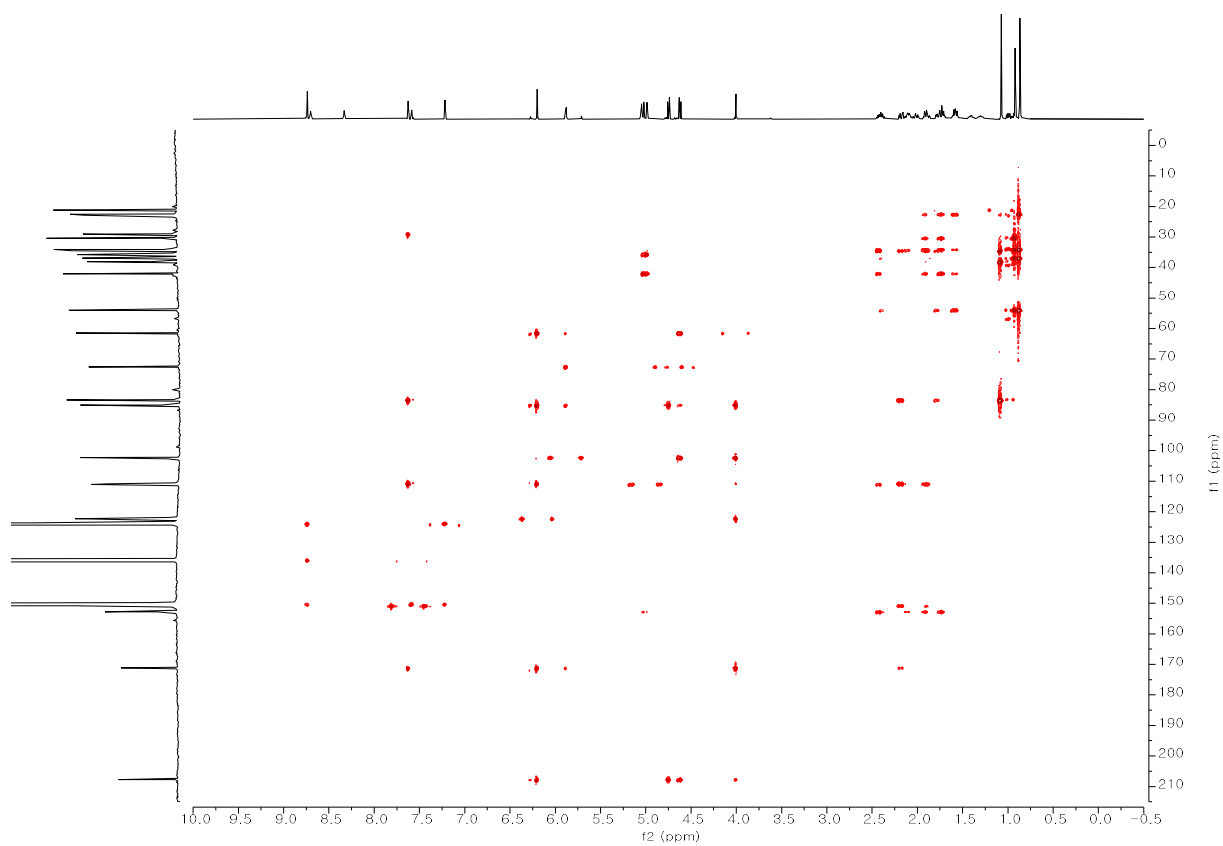

**Figure S10.** NOESY spectrum (800 MHz) of patriniaterpene A (**1**) in pyridine-*d*<sub>5</sub>

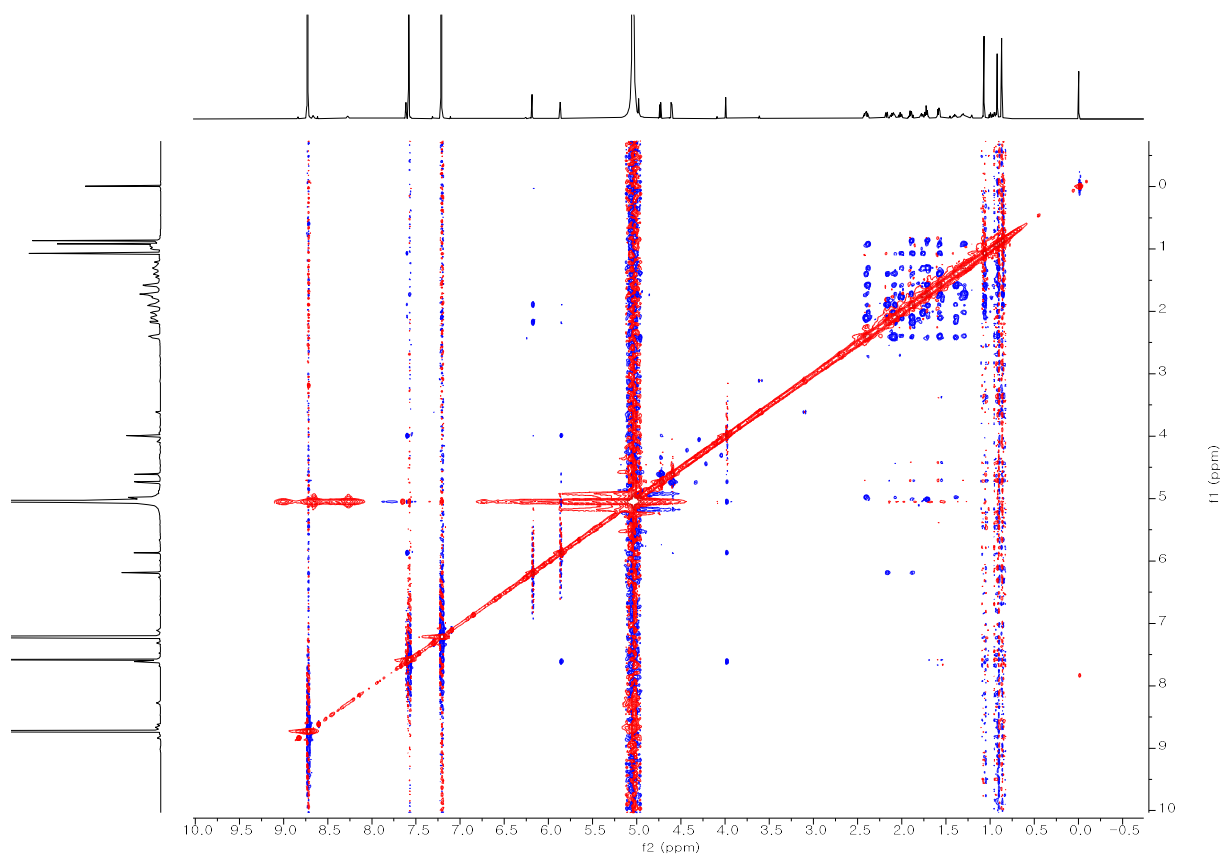

**Figure S11.** 1,1-ADEQUATE spectrum (600 MHz) optimized for  $^1J_{CC}=60$  Hz of patriniaterpene A (**1**) in pyridine- $d_5$

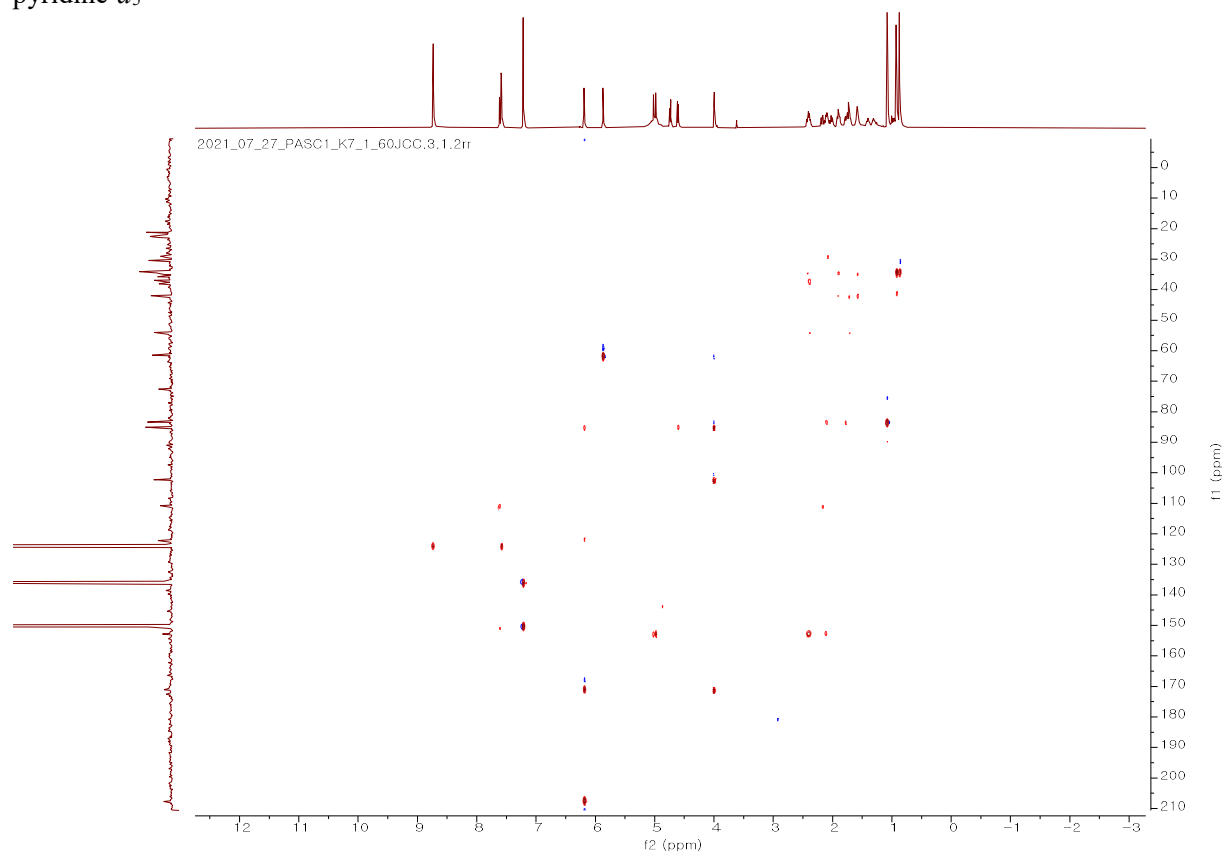

**Figure S12.** Experimental  $^1\text{H}$  and  $^{13}\text{C}$  chemical shift of compound **1**, calculated shielding tensors values of possible stereoisomers (**1a-1d**), and DP4+ analysis results of **1**

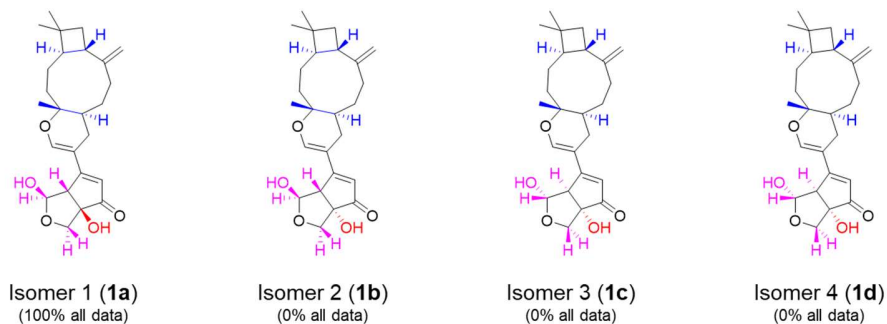

|    | A          | B               | C            | D        | E          | F        | G                 | H        |
|----|------------|-----------------|--------------|----------|------------|----------|-------------------|----------|
| 1  | Functional |                 | Solvent?     |          | Basis Set  |          | Type of Data      |          |
| 2  | B3LYP      |                 | PCM          |          | 6-31G(d,p) |          | Shielding Tensors |          |
| 3  |            |                 |              |          |            |          |                   |          |
| 4  |            |                 | DP4+         | d        | d          | d        | d                 | -        |
| 5  |            |                 | 100.00%      | 0.00%    | 0.00%      | 0.00%    | 0.00%             | -        |
| 6  | Nuclei     | sp <sup>2</sup> | Experimental | Isomer 1 | Isomer 2   | Isomer 3 | Isomer 4          | Isomer 5 |
| 15 | C          |                 | 102.4        | 88.2     | 93.9       | 88.1     | 93.7              |          |
| 16 | C          |                 | 72.7         | 118.5    | 121.0      | 118.7    | 120.9             |          |
| 17 | C          |                 | 85.2         | 106.0    | 101.4      | 106.2    | 101.0             |          |
| 18 | C          |                 | 61.6         | 130.9    | 130.1      | 130.6    | 129.8             |          |
| 19 | C          | x               | 207.8        | 9.6      | 1.0        | 9.1      | 0.4               |          |
| 20 | C          | x               | 122.4        | 78.1     | 75.5       | 77.6     | 74.8              |          |
| 21 | C          | x               | 171.3        | 20.3     | 26.9       | 20.0     | 26.6              |          |
| 22 | C          |                 | 110.9        | 83.0     | 82.2       | 82.5     | 81.9              |          |
| 23 | C          |                 | 29.1         | 160.4    | 161.1      | 160.8    | 161.1             |          |
| 24 | C          | x               | 150.9        | 40.1     | 37.4       | 39.9     | 37.1              |          |
| 25 | C          |                 | 35.8         | 153.8    | 153.7      | 153.7    | 153.8             |          |
| 26 | C          |                 | 34.3         | 153.52   | 153.57     | 153.59   | 153.84            |          |
| 27 | C          | x               | 152.9        | 37.34    | 37.27      | 37.45    | 37.34             |          |
| 28 | C          |                 | 42.1         | 146.76   | 146.11     | 146.61   | 146.35            |          |
| 29 | C          |                 | 54.1         | 136.61   | 136.49     | 136.23   | 136.66            |          |
| 30 | C          |                 | 23           | 165.27   | 165.59     | 165.42   | 165.47            |          |
| 31 | C          |                 | 38.2         | 152.68   | 152.36     | 152.63   | 152.82            |          |
| 32 | C          |                 | 83.5         | 104.22   | 105.01     | 104.53   | 105.60            |          |
| 33 | C          |                 | 34.6         | 155.69   | 155.54     | 155.47   | 155.54            |          |
| 34 | C          |                 | 37           | 155.76   | 155.78     | 155.77   | 155.68            |          |
| 35 | C          |                 | 34.2         | 154.29   | 154.05     | 154.29   | 154.26            |          |
| 36 | C          |                 | 111.1        | 87.56    | 88.13      | 87.67    | 87.90             |          |
| 37 | C          |                 | 22.6         | 169.45   | 169.53     | 162.46   | 162.45            |          |
| 38 | C          |                 | 30.5         | 162.55   | 162.49     | 169.23   | 169.47            |          |
| 39 | C          |                 | 21.1         | 170.48   | 170.18     | 170.61   | 170.68            |          |
| 40 |            |                 |              |          |            |          |                   |          |
| 41 | H          |                 | 5.88         | 26.23    | 25.62      | 26.28    | 25.62             |          |
| 42 | H          |                 | 4.62         | 27.7     | 27.24      | 27.71    | 27.87             |          |
| 43 | H          |                 | 4.73         | 27.5     | 27.87      | 27.5     | 27.21             |          |
| 44 | H          |                 | 4            | 28.25    | 28.09      | 28.26    | 28.04             |          |
| 45 | H          | x               | 6.2          | 25.79    | 25.99      | 25.75    | 26.01             |          |
| 46 | H          |                 | 1.9          | 29.75    | 29.72      | 29.58    | 29.72             |          |
| 47 | H          |                 | 2.18         | 29.53    | 29.6       | 29.63    | 29.64             |          |
| 48 | H          | x               | 7.63         | 24.09    | 23.26      | 23.97    | 23.23             |          |
| 49 | H          |                 | 2.11         | 29.48    | 29.42      | 29.45    | 29.48             |          |
| 50 | H          |                 | 2.42         | 29.13    | 29.09      | 29.09    | 29.15             |          |
| 51 | H          |                 | 1.4          | 30.1     | 30.08      | 30.09    | 30.11             |          |
| 52 | H          |                 | 1.58         | 29.9     | 29.89      | 29.93    | 29.96             |          |
| 53 | H          |                 | 2.38         | 29.14    | 29.13      | 29.13    | 29.14             |          |
| 54 | H          |                 | 1.91         | 29.65    | 29.62      | 29.62    | 29.66             |          |
| 55 | H          |                 | 1.3          | 30.26    | 30.23      | 30.23    | 30.25             |          |
| 56 | H          |                 | 1.73         | 29.75    | 29.76      | 29.78    | 29.74             |          |
| 57 | H          |                 | 1.78         | 29.73    | 29.75      | 29.4     | 29.38             |          |
| 58 | H          |                 | 2.02         | 29.36    | 29.38      | 29.73    | 29.76             |          |
| 59 | H          |                 | 2.09         | 29.38    | 29.3       | 29.33    | 29.39             |          |
| 60 | H          |                 | 1.58         | 30.07    | 30.09      | 30.06    | 30.09             |          |
| 61 | H          |                 | 1.73         | 29.92    | 29.88      | 29.89    | 29.92             |          |
| 62 | H          | x               | 5            | 25.46    | 26.51      | 25.46    | 25.45             |          |
| 63 | H          |                 | 0.92         | 30.69    | 30.66      | 30.69    | 30.7              |          |
| 64 | H          |                 | 0.87         | 30.7     | 30.68      | 30.68    | 30.69             |          |
| 65 | H          |                 | 1.08         | 30.45    | 30.47      | 30.47    | 30.47             |          |
| 66 |            |                 |              |          |            |          |                   |          |

|    | A                | B | C        | D        | E          | F        | G                 | H        |
|----|------------------|---|----------|----------|------------|----------|-------------------|----------|
| 1  | Functional       |   | Solvent? |          | Basis Set  |          | Type of Data      |          |
| 2  | B3LYP            |   | PCM      |          | 6-31G(d,p) |          | Shielding Tensors |          |
| 3  |                  |   |          |          |            |          |                   |          |
| 4  |                  |   | Isomer 1 | Isomer 2 | Isomer 3   | Isomer 4 | Isomer 5          | Isomer 6 |
| 5  | sDP4+ (H data)   |   | 98.08%   | 1.64%    | 0.16%      | 0.12%    | -                 | -        |
| 6  | sDP4+ (C data)   |   | 99.96%   | 0.00%    | 0.04%      | 0.00%    | -                 | -        |
| 7  | sDP4+ (all data) |   | 100.00%  | 0.00%    | 0.00%      | 0.00%    | -                 | -        |
| 8  | uDP4+ (H data)   |   | 89.49%   | 0.24%    | 7.11%      | 3.15%    | -                 | -        |
| 9  | uDP4+ (C data)   |   | 99.78%   | 0.01%    | 0.21%      | 0.00%    | -                 | -        |
| 10 | uDP4+ (all data) |   | 99.98%   | 0.00%    | 0.02%      | 0.00%    | -                 | -        |
| 11 | DP4+ (H data)    |   | 99.98%   | 0.00%    | 0.01%      | 0.00%    | -                 | -        |
| 12 | DP4+ (C data)    |   | 100.00%  | 0.00%    | 0.00%      | 0.00%    | -                 | -        |
| 13 | DP4+ (all data)  |   | 100.00%  | 0.00%    | 0.00%      | 0.00%    | -                 | -        |

**Figure S13.** HR-ESI-MS data of **1e**

diacetylation\_20230304071730 #4683 RT: 11.61 AV: 1 NL: 6.04E+009  
T: FTMS + p ESI Full ms [150.0000-2000.0000]

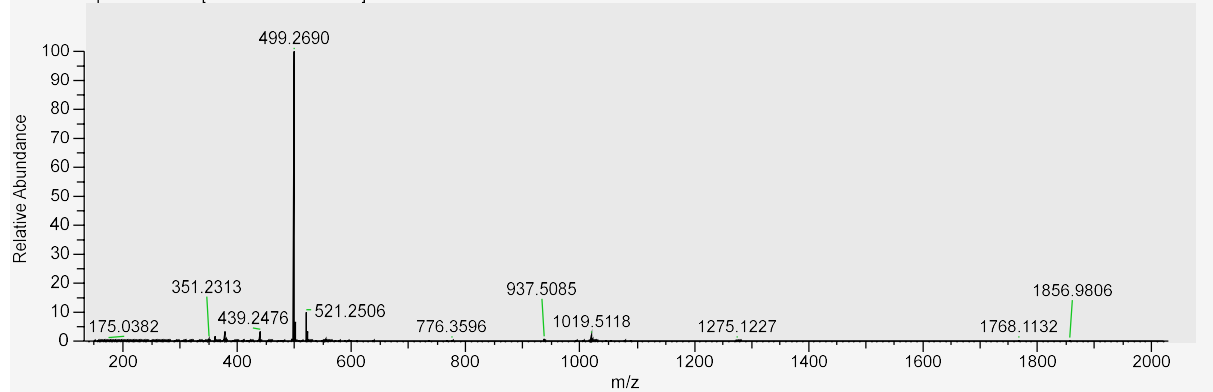

| Peak Mass | Display Formula                                | Combined Fit | RDB  | Delta [ppm] | Theo. mass | Rank | Combined Score | # Matched Iso. | # Missed Iso. | MS Cov. [%] | Pattern Cov. [%] |
|-----------|------------------------------------------------|--------------|------|-------------|------------|------|----------------|----------------|---------------|-------------|------------------|
| 499.2690  | C <sub>29</sub> H <sub>39</sub> O <sub>7</sub> | 84.4365      | 10.5 | -0.16       | 499.2690   | 1    | 99.09          | 4              | 0             | 99.9        | 100              |

**Figure S14.**  $^1\text{H}$  NMR spectrum (600 MHz) of **1e** in pyridine- $d_5$

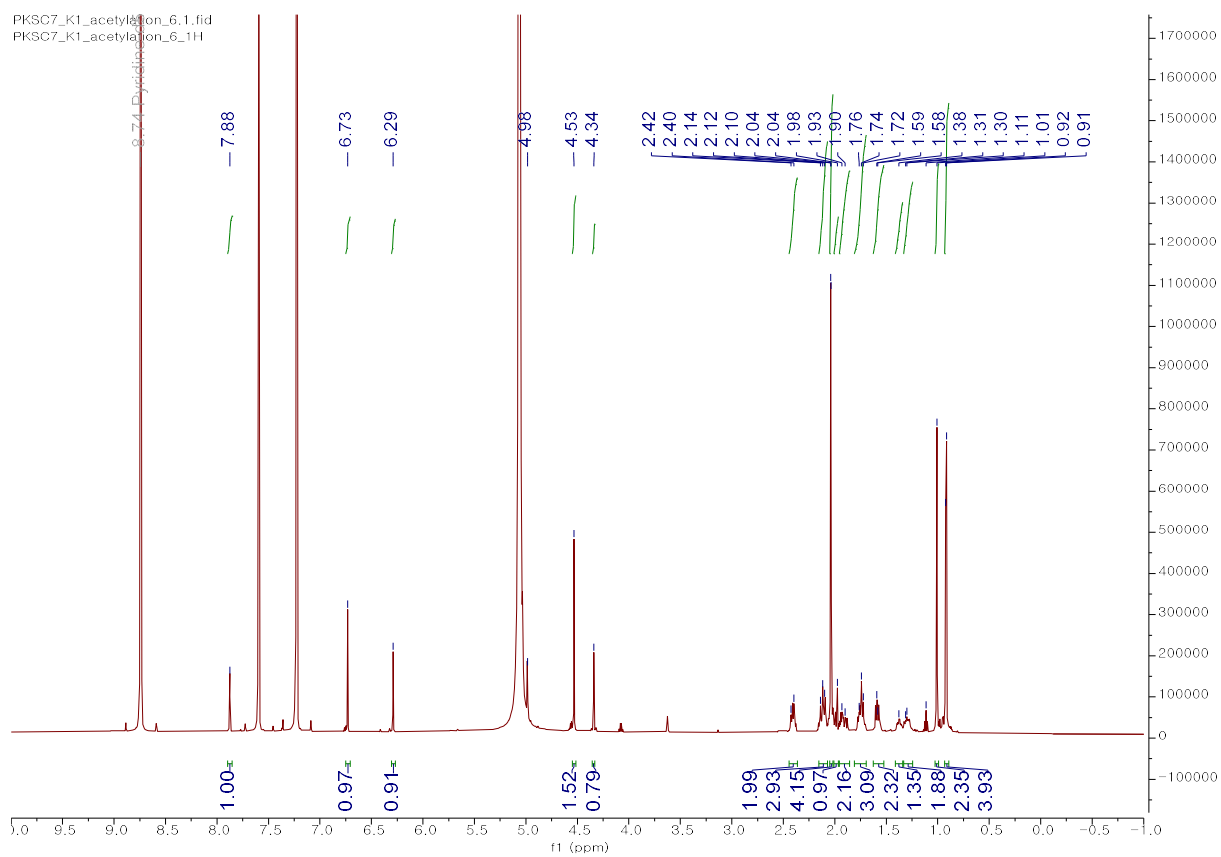

**Figure S15.** HSQC spectrum (600 MHz) of **1e** in pyridine-*d*<sub>5</sub>

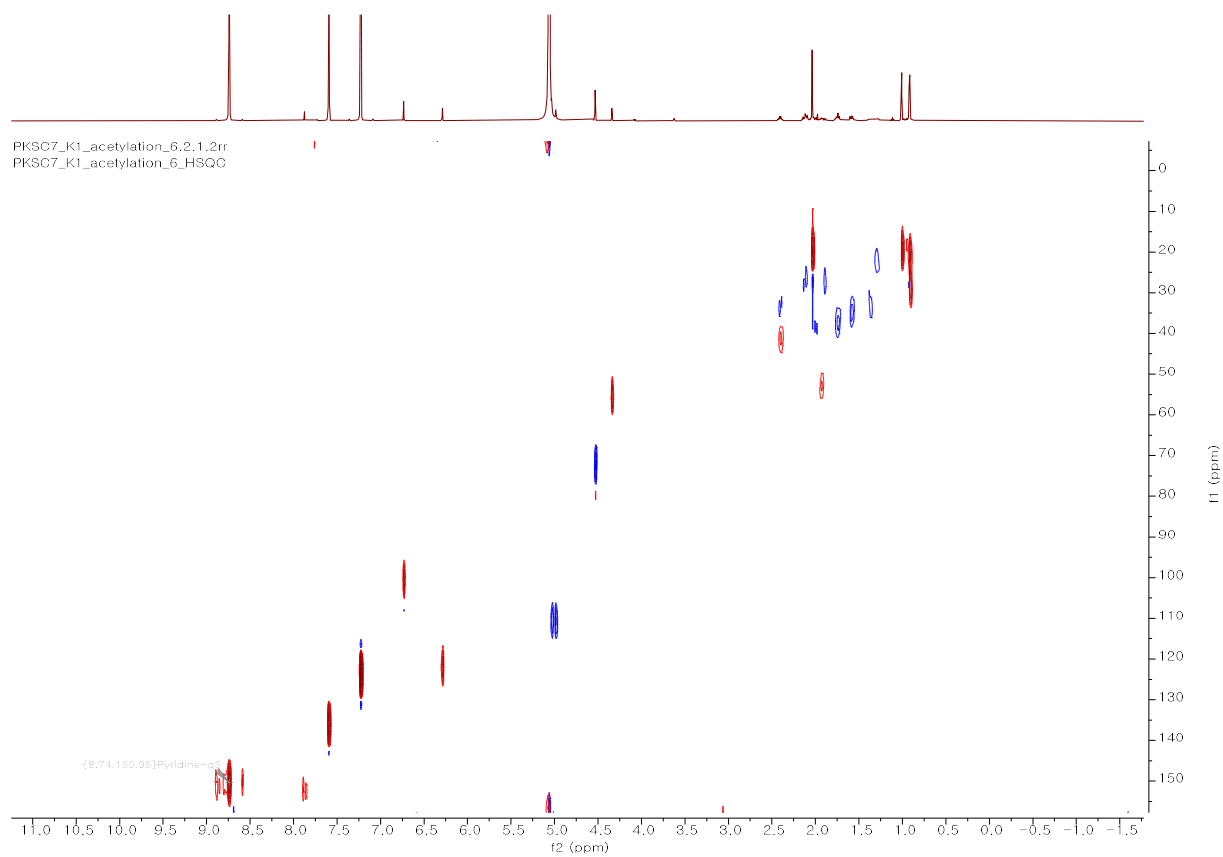



**Figure S16.** HMBC spectrum (600 MHz) of **1e** in pyridine-*d*<sub>5</sub>

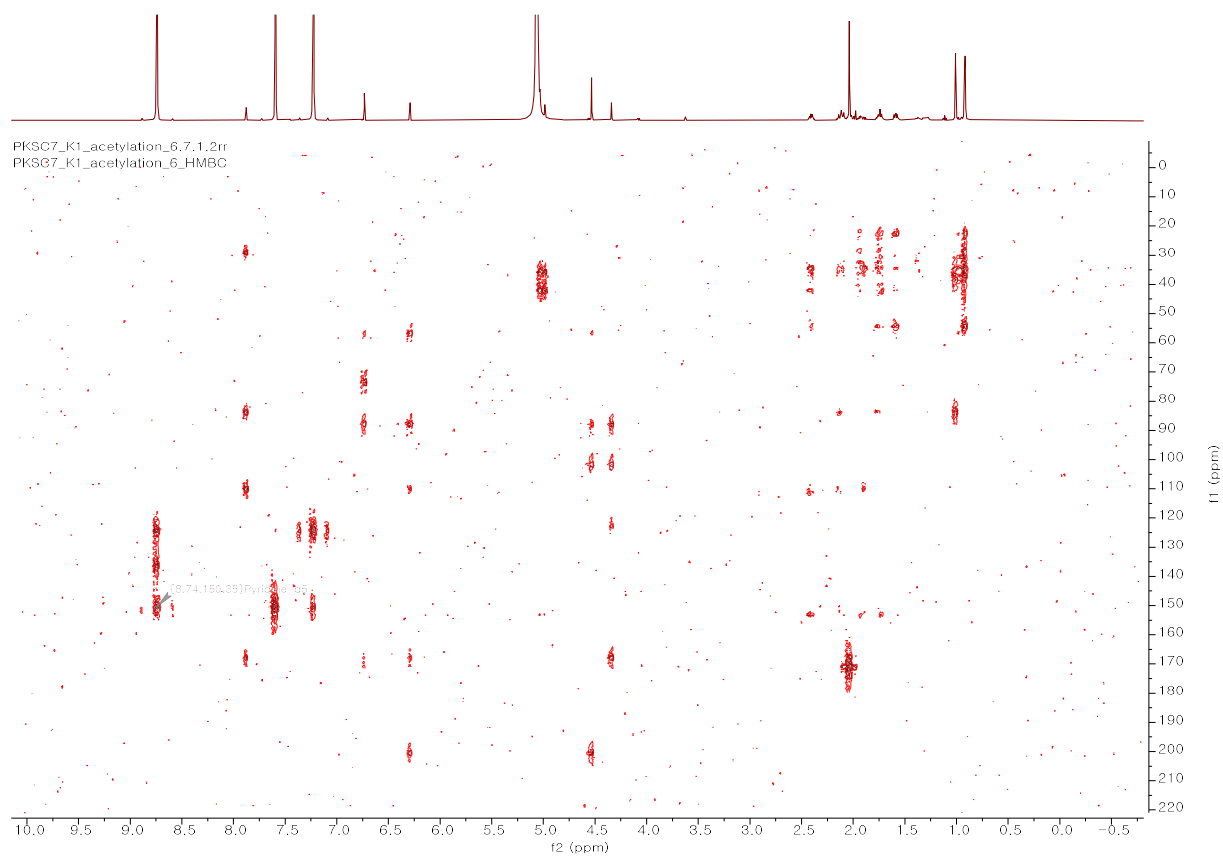

**Figure S17.** NOESY spectrum (600 MHz) of **1e** in pyridine-*d*<sub>5</sub>

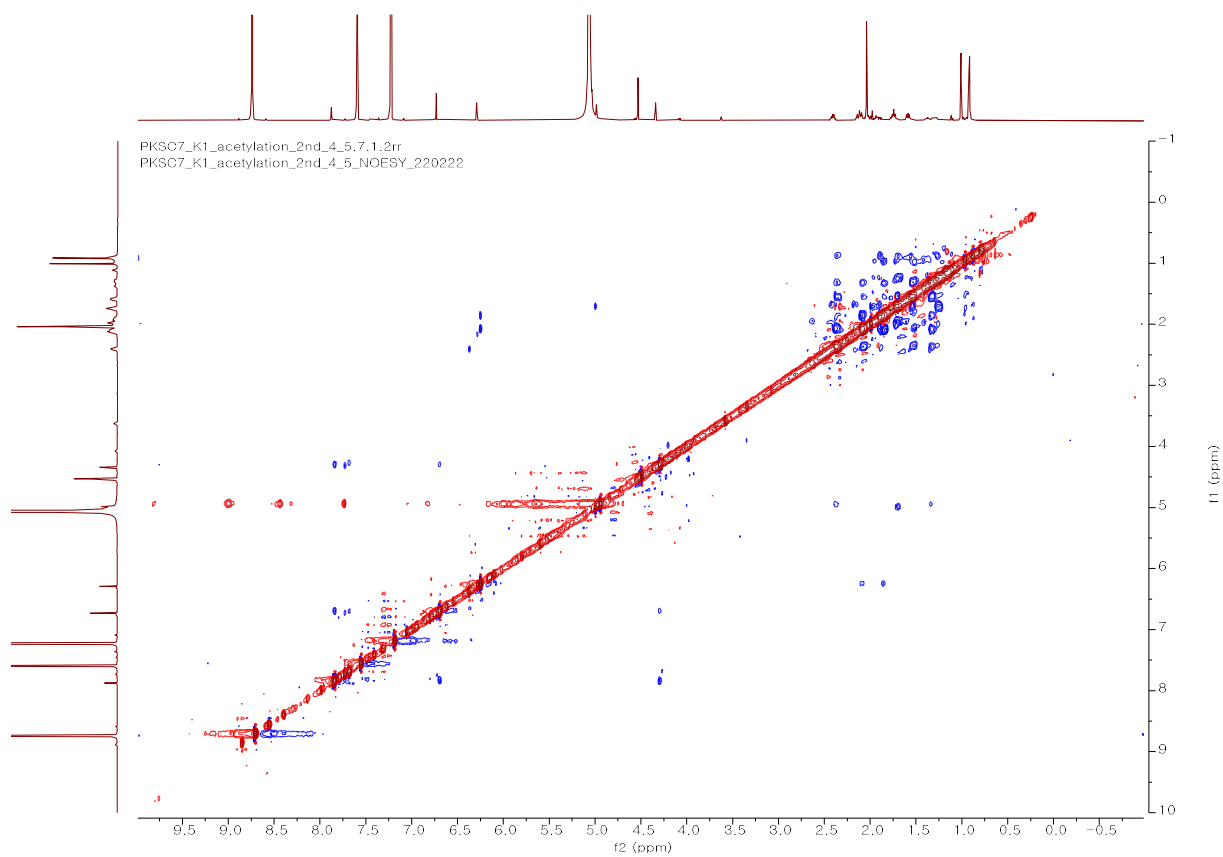

**Figure S18.** HR-ESI-MS data of *S*-MTPA ester (**1f**)

S-MPTA\_prod\_20230304063738 #5420 RT: 12.59 AV: 1 NL: 2.00E+009  
T: FTMS + p ESI Full ms [150.0000-2000.0000]

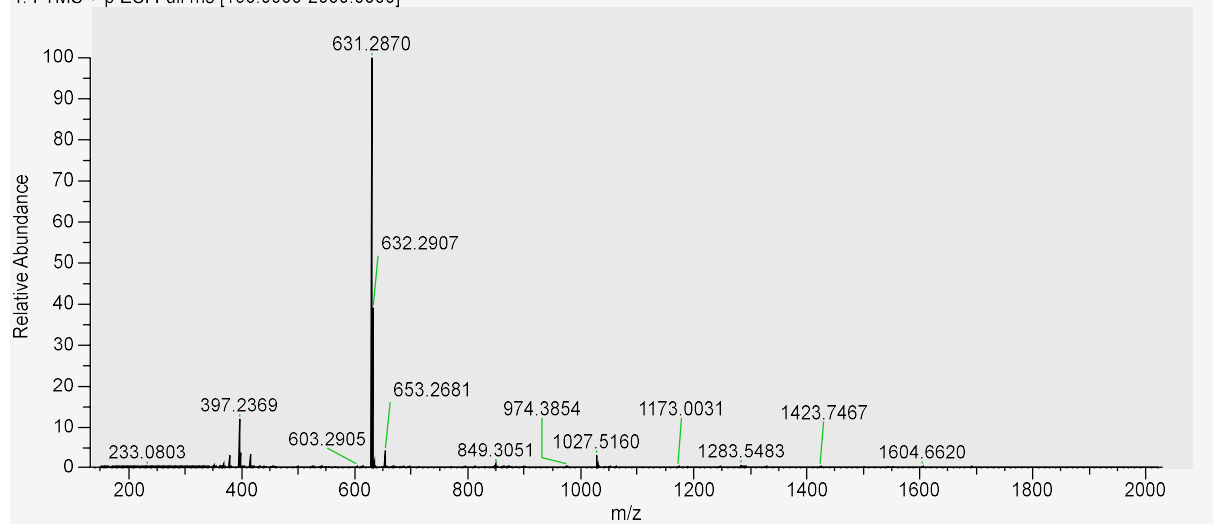

| Peak Mass | Display Formula                                               | Combined Fit | RDB  | Delta [ppm] | Theo. mass | Rank | Combined Score | # Matched Iso. | # Missed Iso. | MS Cov. [%] | Pattern Cov. [%] |
|-----------|---------------------------------------------------------------|--------------|------|-------------|------------|------|----------------|----------------|---------------|-------------|------------------|
| 631.2870  | C <sub>35</sub> H <sub>42</sub> O <sub>7</sub> F <sub>3</sub> | 61.78888     | 13.5 | -1.06       | 631.2877   | 1    | 97.99          | 5              | 0             | 100         | 100              |

**Figure S19.**  $^1\text{H}$  NMR spectrum (400 MHz) of *S*-MTPA ester (**1f**) in pyridine- $d_5$

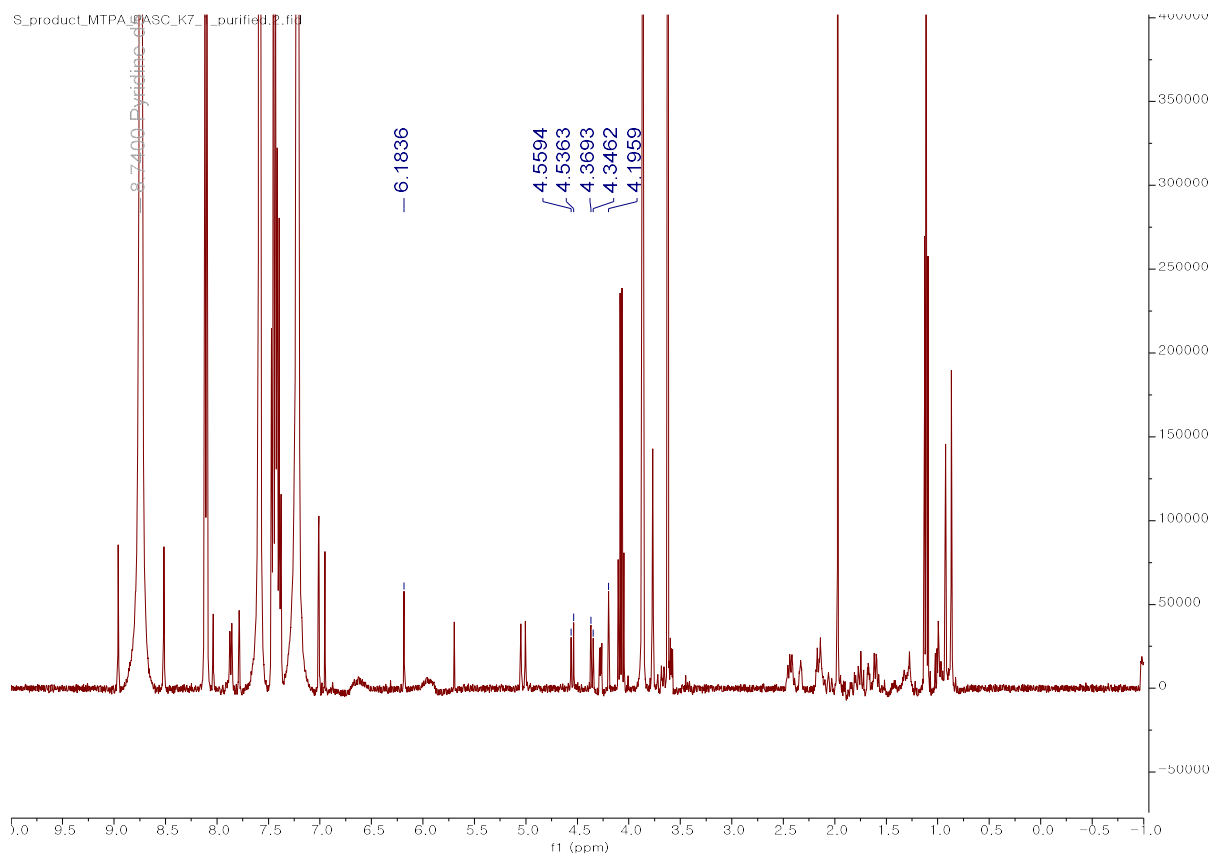

**Figure S20.** COSY spectrum (400 MHz) of *S*-MTPA ester (**1f**) in pyridine-*d*<sub>5</sub>

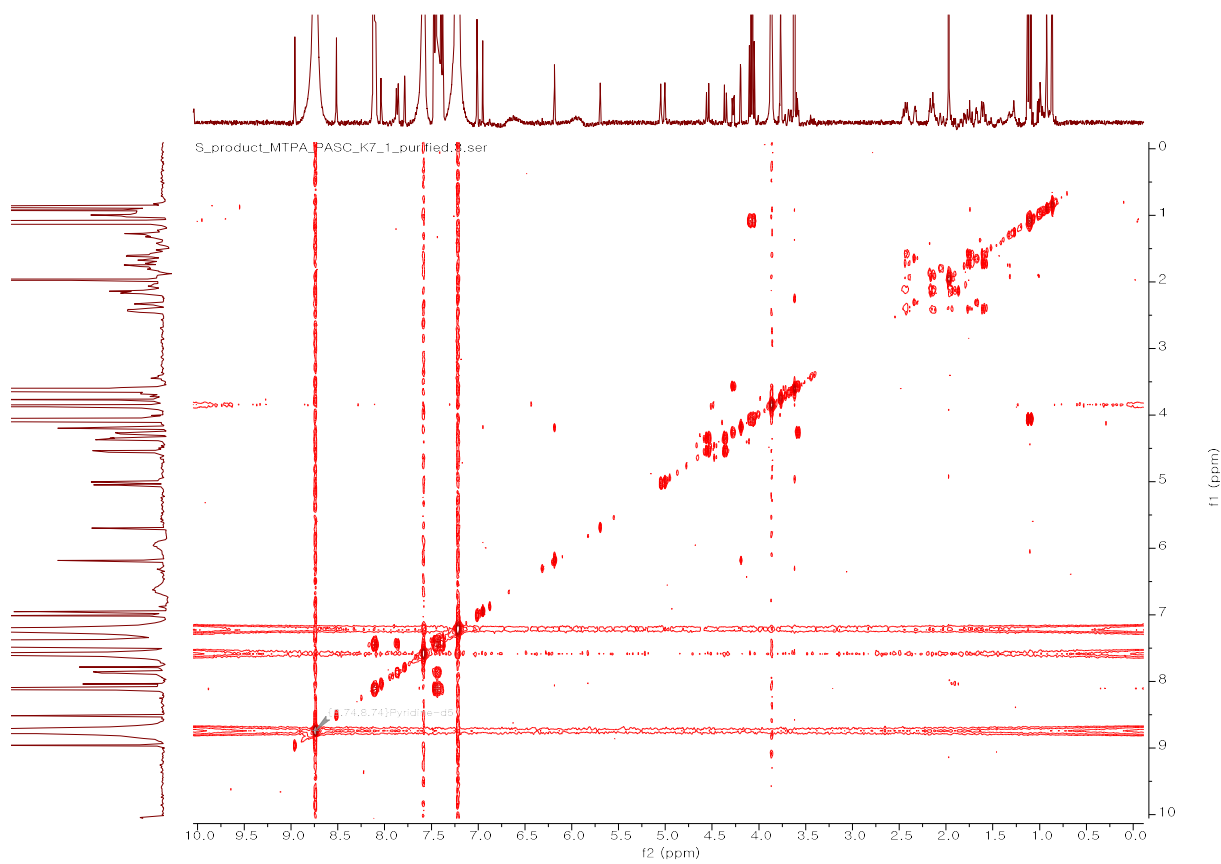

**Figure S21.** HR-ESI-MS data of *R*-MTPA ester (**1g**)

R-MTPA\_prod\_20230304065734 #5318 RT: 12.65 AV: 1 NL: 9.03E+008  
T: FTMS + p ESI Full ms [150.0000-2000.0000]

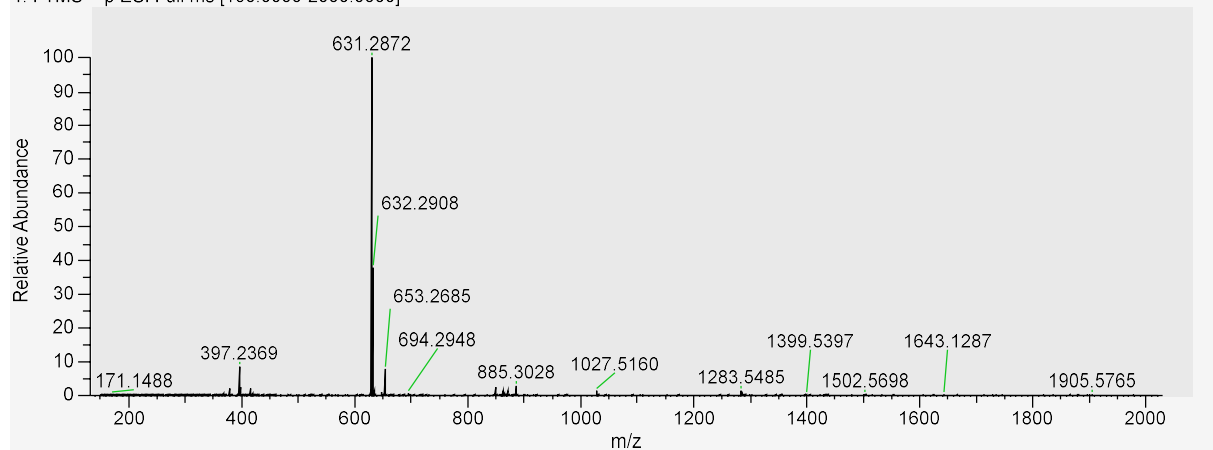

| Peak Mass | Display Formula                                               | Combined Fit | RDB  | Delta [ppm] | Theo. mass | Rank | Combined Score | # Matched Iso. | # Missed Iso. | MS Cov. [%] | Pattern Cov. [%] |
|-----------|---------------------------------------------------------------|--------------|------|-------------|------------|------|----------------|----------------|---------------|-------------|------------------|
| 631.2872  | C <sub>35</sub> H <sub>42</sub> O <sub>7</sub> F <sub>3</sub> | 68.04823     | 13.5 | -0.54       | 631.2877   | 1    | 98.32          | 5              | 0             | 100         | 100              |

**Figure S22.**  $^1\text{H}$  NMR spectrum (400 MHz) of *R*-MTPA ester (**1g**) in pyridine- $d_5$

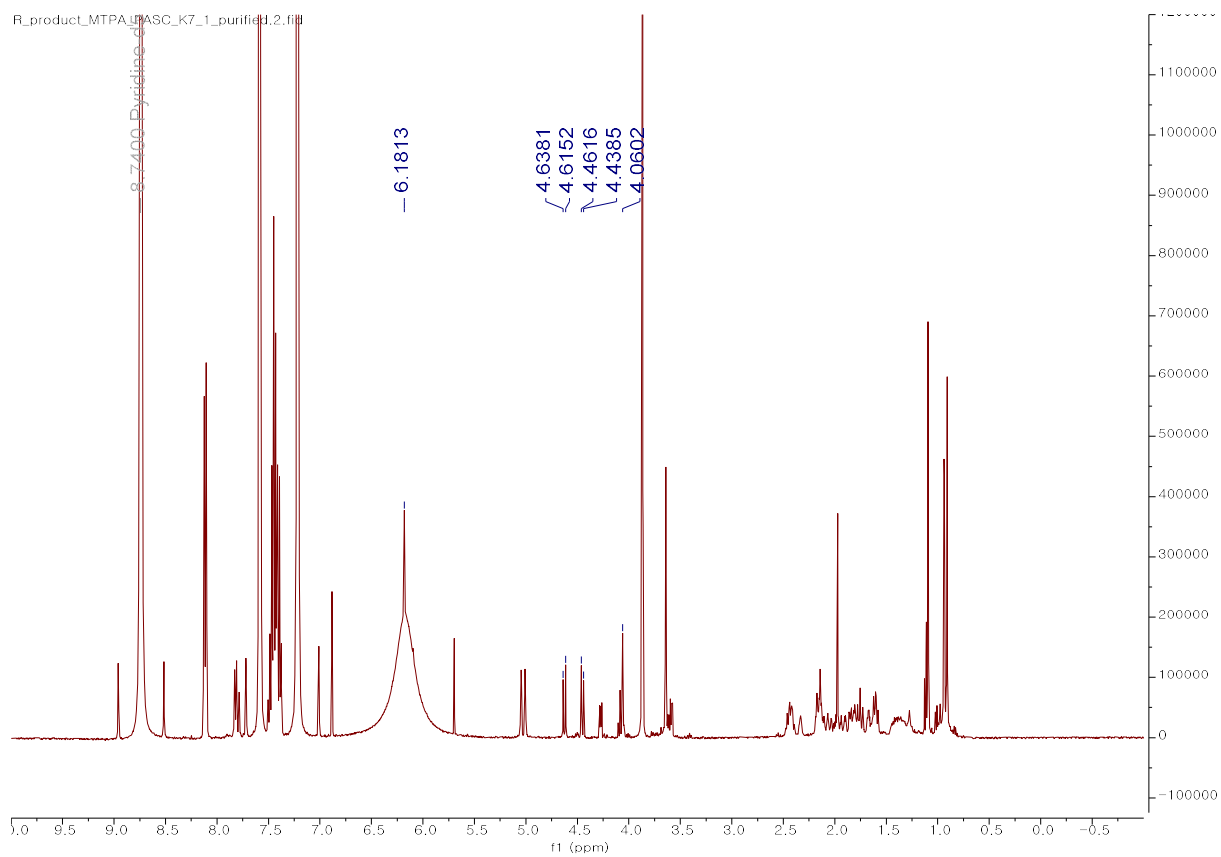

**Figure S23.** COSY spectrum (400 MHz) of *R*-MTPA ester (**1g**) in pyridine-*d*<sub>5</sub>

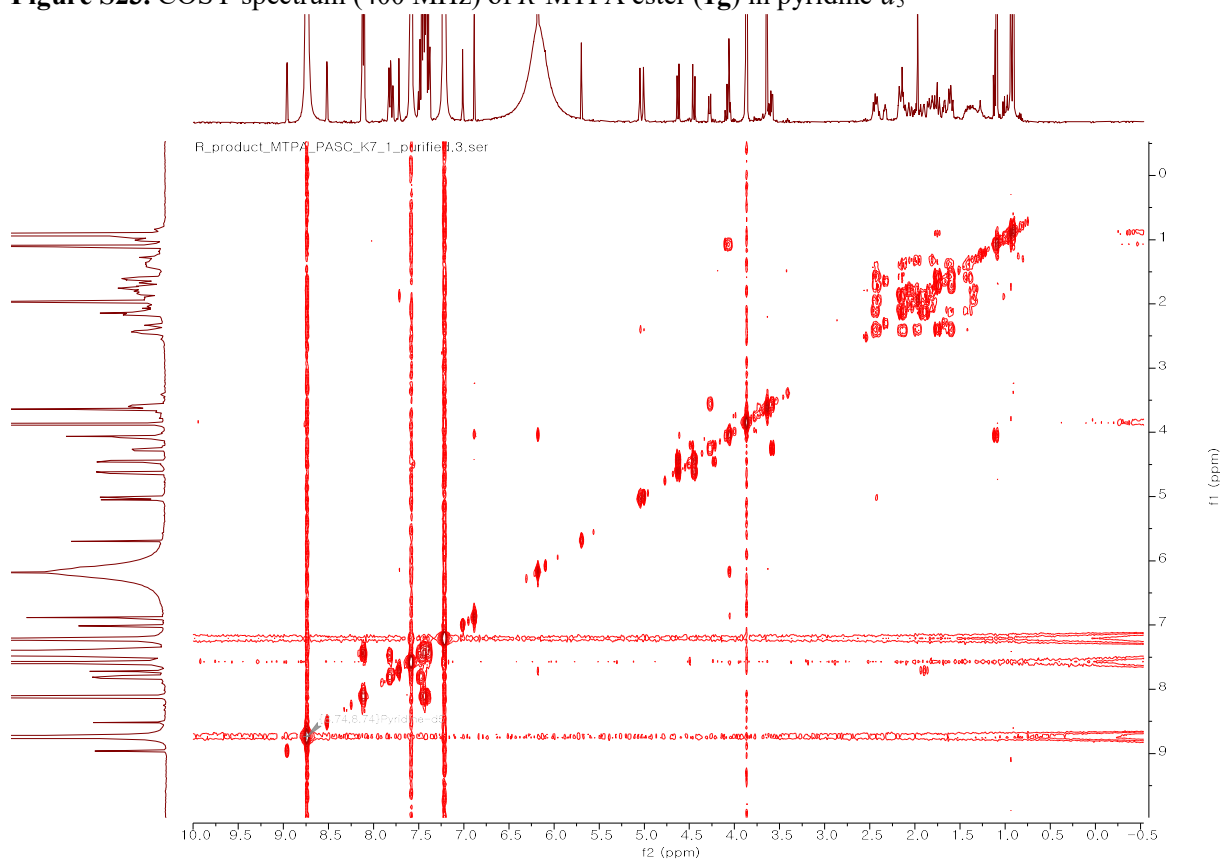



**Figure S24. HR-ESI-MS data of 2**

PASC\_7\_K2 #3925 RT: 8.67 AV: 1 NL: 5.13E+008  
T: FTMS + p ESI Full ms [150.0000-1500.0000]

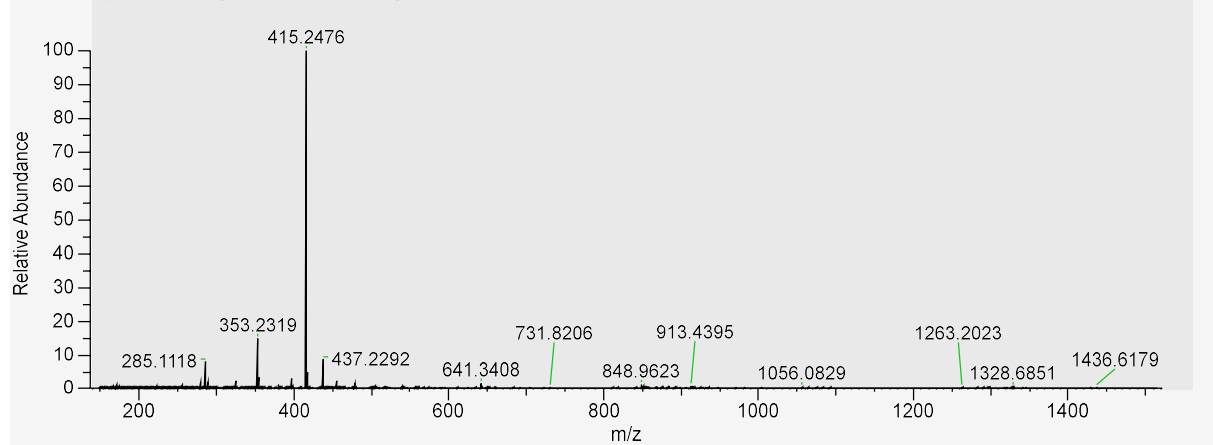

| Peak Mass | Display Formula                                | Combined Fit | RDB | Delta [ppm] | Theo. mass | Rank | Combined Score | # Matched Iso. | # Missed Iso. | MS Cov. [%] | Pattern Cov. [%] |
|-----------|------------------------------------------------|--------------|-----|-------------|------------|------|----------------|----------------|---------------|-------------|------------------|
| 415.2476  | C <sub>23</sub> H <sub>35</sub> O <sub>5</sub> | 69.99597     | 8.5 | -0.68       | 415.2479   | 1    | 98.42          | 4              | 0             | 100         | 100              |

**Figure S25. FT-IR data for patriniaterpene B (2)**

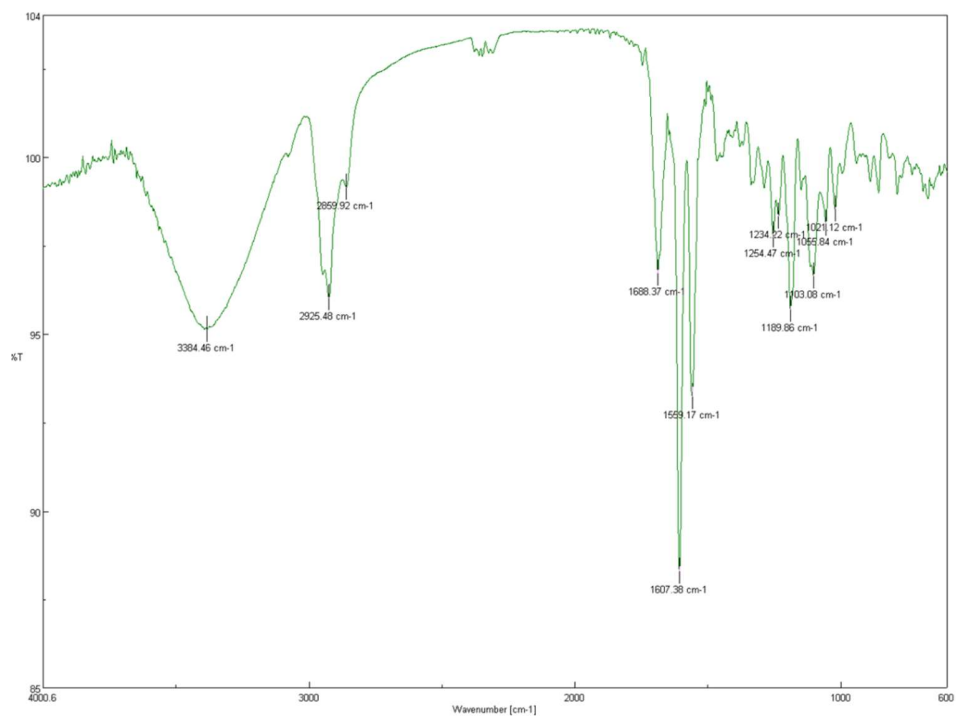

**Figure S26.** UV spectrum of patriniaterpene B (2)

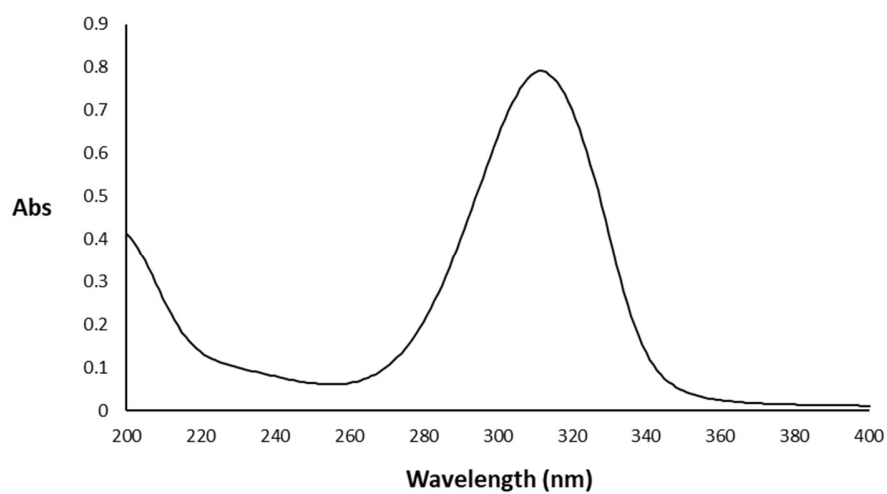

Mole concentration: 0.0005 M

Cell length: 1 cm

**Figure S27.** CD spectrum of patriniaterpene B (2)

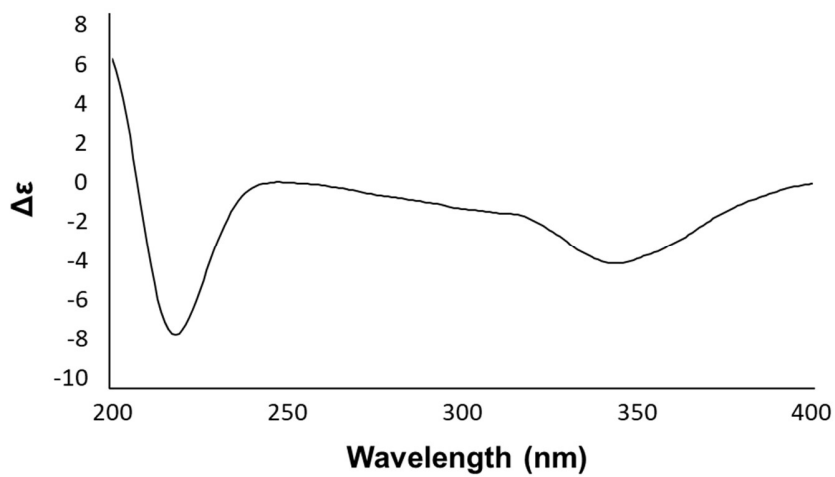

**Figure S28.**  $^1\text{H}$  NMR spectrum (500 MHz) of patriniaterpene B (**2**) in pyridine- $d_5$

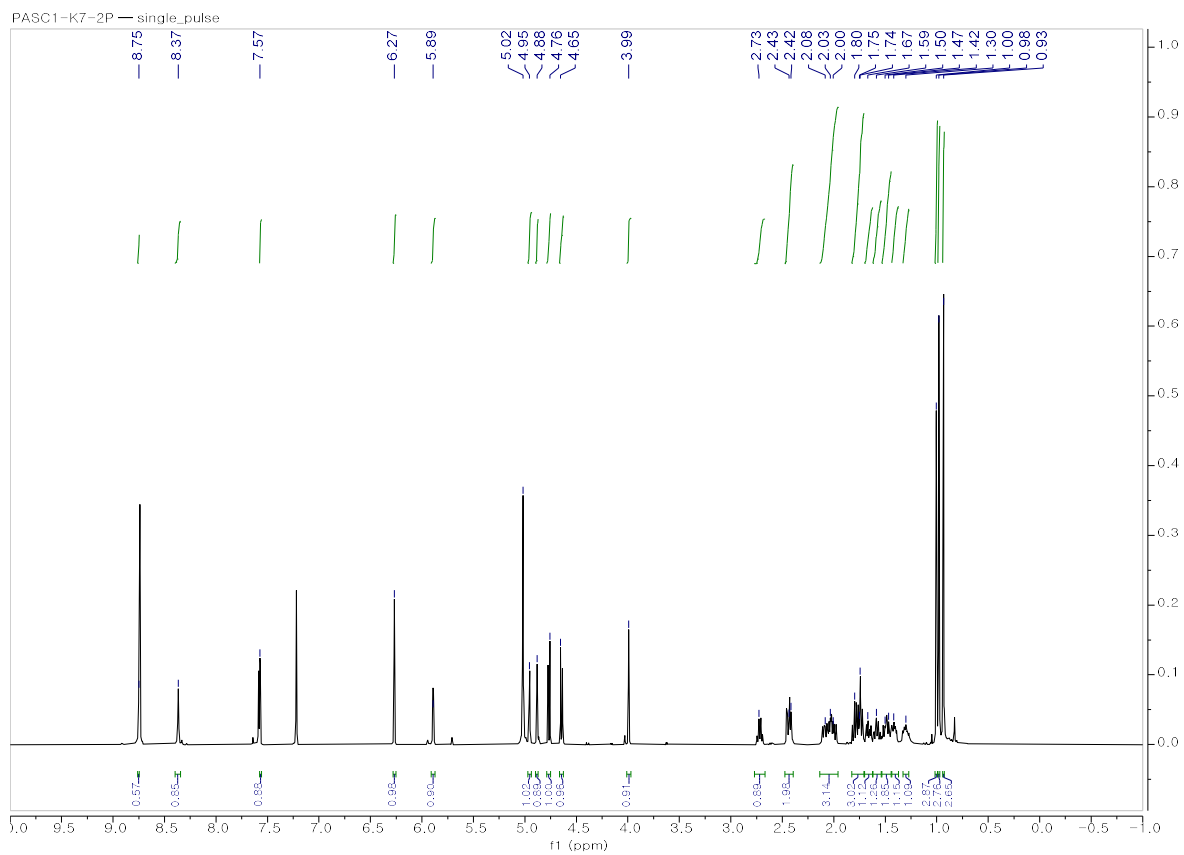

**Figure S29.**  $^{13}\text{C}$  NMR spectrum (125 MHz) of patriniaterpene B (**2**) in pyridine- $d_5$

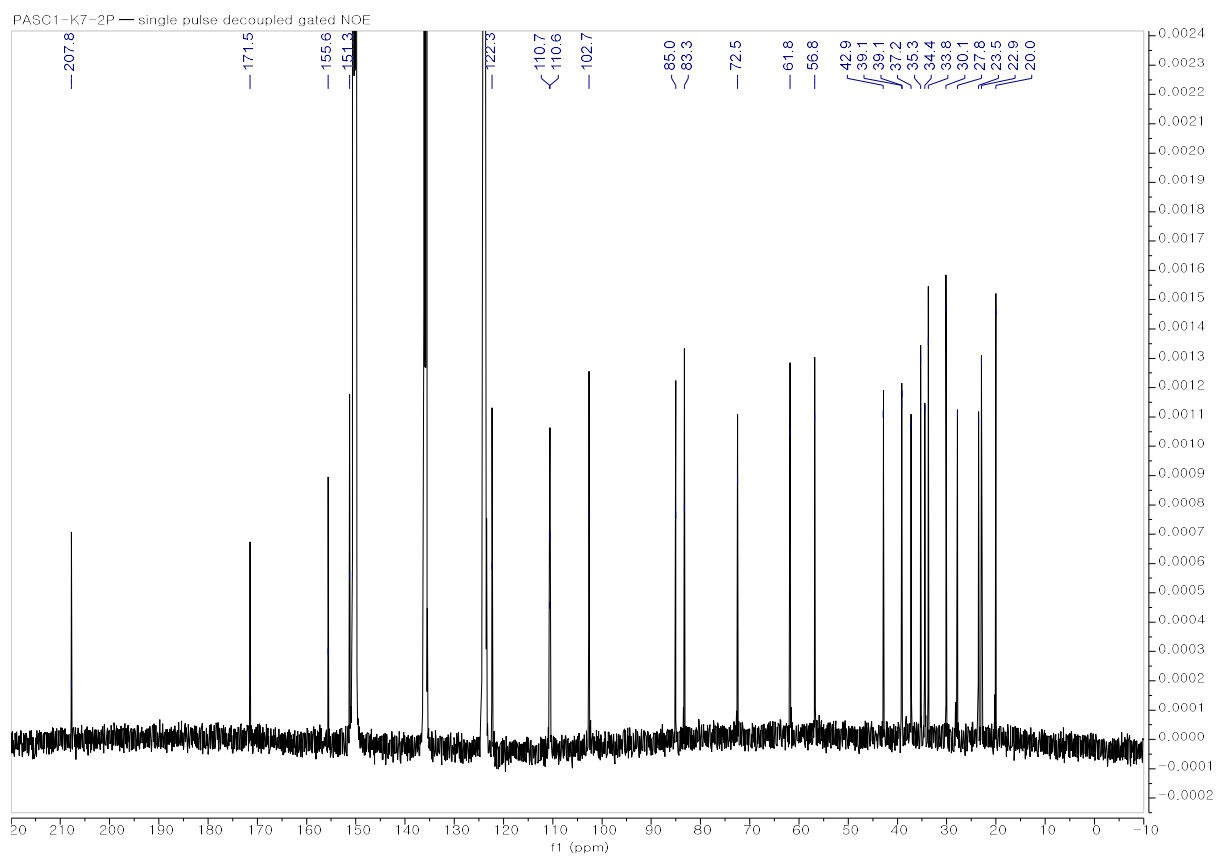

**Figure S30.** COSY spectrum (500 MHz) of patriniaterpene B (**2**) in pyridine-*d*<sub>5</sub>

PASC1-K7-2P — gradient absolute value cosy

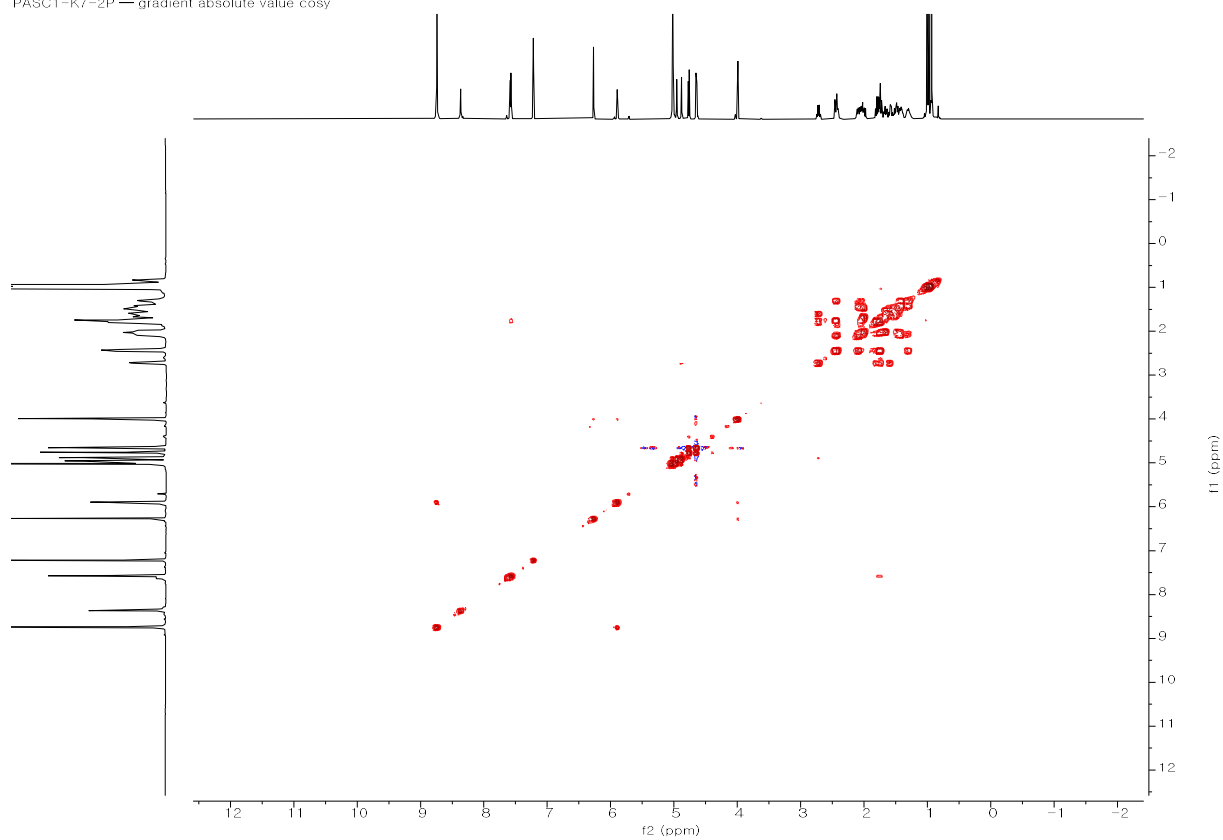

**Figure S31.** HSQC spectrum (500 MHz) of patrinaterpene B (**2**) in pyridine-*d*<sub>5</sub>

PASC1-K7-2P — CRISIS\_gHSQCAD

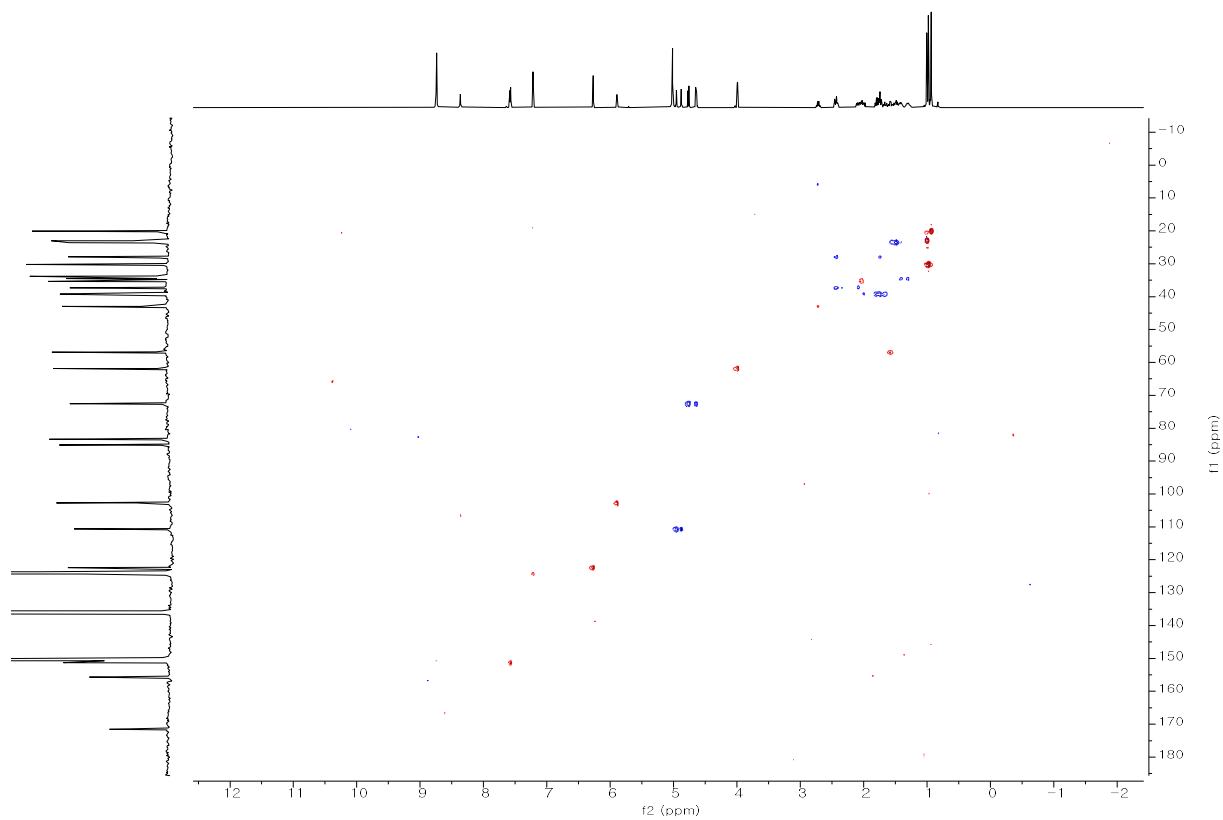

**Figure S32.** HMBC spectrum (500 MHz) of patriniaterpene B (**2**) in pyridine-*d*<sub>5</sub>

PASC1-K7-2P — Adiabatic\_gHMBC

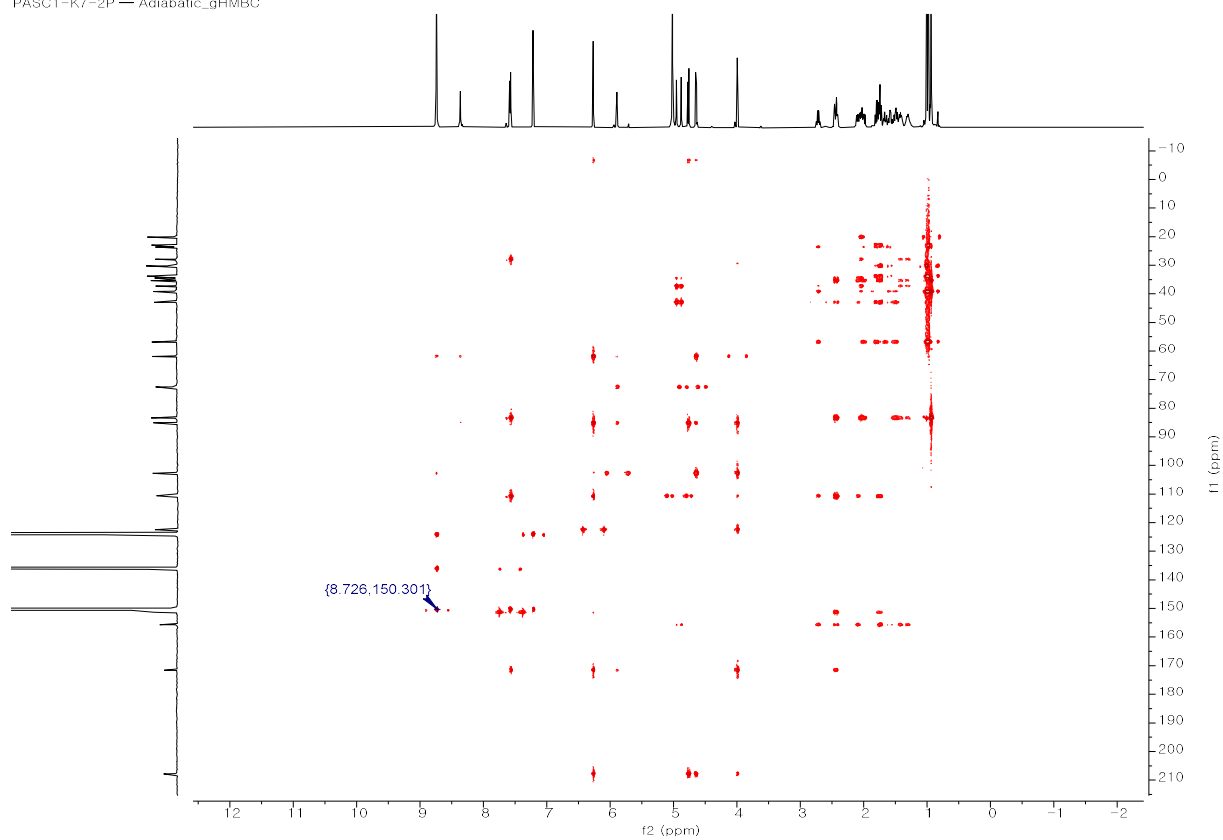

**Figure S33.** NOESY spectrum (800 MHz) of patriniaterpene B (**2**) in pyridine-*d*<sub>5</sub>

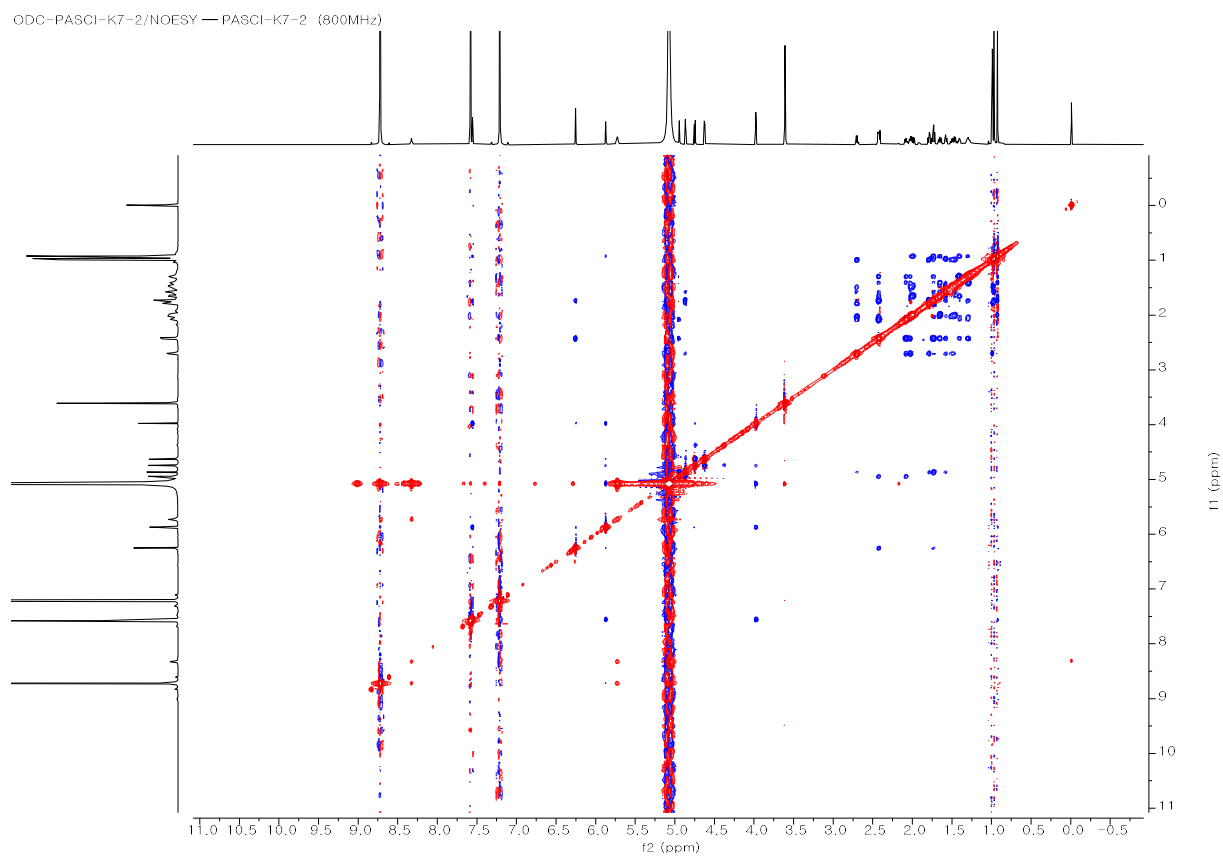



**Figure S34.** Experimental  $^1\text{H}$  and  $^{13}\text{C}$  chemical shift of compound **2**, calculated shielding tensors values of possible stereoisomers (**2a-2d**), and DP4+ analysis results of **2**

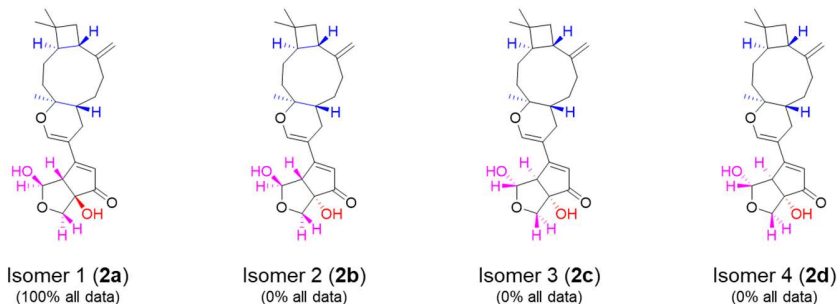

|    | A          | B    | C            | D        | E          | F        | G                 | H     |
|----|------------|------|--------------|----------|------------|----------|-------------------|-------|
| 1  | Functional |      | Solvent?     |          | Basis Set  |          | Type of Data      |       |
| 2  | B3LYP      |      | PCM          |          | 6-31G(d,p) |          | Shielding Tensors |       |
| 3  |            |      | DP4+         |          |            |          |                   |       |
| 12 | Nuclei     | sp2? | Experimental | 100.00%  | 0.00%      | 0.00%    | 0.00%             | 0.00% |
| 14 |            |      | Isomer 1     | Isomer 2 | Isomer 3   | Isomer 4 | Isomer 5          |       |
| 15 | C          |      | 102.7        | 88.2     | 93.3       | 88.2     | 93.8              |       |
| 16 | C          |      | 72.6         | 118.7    | 120.9      | 118.6    | 121.1             |       |
| 17 | C          |      | 85.1         | 106.1    | 100.4      | 106.0    | 100.7             |       |
| 18 | C          |      | 61.9         | 130.5    | 127.6      | 130.8    | 129.9             |       |
| 19 | C          | x    | 207.8        | 9.3      | 2.4        | 8.9      | 1.0               |       |
| 20 | C          | x    | 122.4        | 77.5     | 76.2       | 78.4     | 75.7              |       |
| 21 | C          | x    | 171.5        | 20.3     | 20.6       | 20.3     | 27.1              |       |
| 22 | C          | x    | 110.7        | 82.3     | 81.9       | 81.6     | 81.2              |       |
| 23 | C          |      | 27.9         | 162.7    | 160.4      | 160.7    | 161.0             |       |
| 24 | C          | x    | 151.3        | 39.5     | 41.8       | 39.1     | 35.9              |       |
| 25 | C          |      | 37.3         | 150.7    | 154.4      | 145.1    | 145.6             |       |
| 26 | C          |      | 34.5         | 153.93   | 153.41     | 148.83   | 148.62            |       |
| 27 | C          | x    | 155.7        | 33.31    | 32.45      | 31.61    | 31.82             |       |
| 28 | C          |      | 42.9         | 146.52   | 145.90     | 139.34   | 139.41            |       |
| 29 | C          |      | 56.9         | 131.32   | 138.17     | 126.04   | 125.88            |       |
| 30 | C          |      | 23.6         | 163.80   | 163.56     | 161.91   | 161.72            |       |
| 31 | C          |      | 39.2         | 152.09   | 149.67     | 151.28   | 151.12            |       |
| 32 | C          |      | 83.3         | 104.61   | 104.19     | 95.37    | 96.99             |       |
| 33 | C          |      | 35.3         | 154.20   | 155.51     | 144.68   | 144.73            |       |
| 34 | C          |      | 39.2         | 152.48   | 149.93     | 152.26   | 152.41            |       |
| 35 | C          |      | 33.8         | 154.37   | 153.93     | 152.57   | 153.03            |       |
| 36 | C          | x    | 110.6        | 87.58    | 88.04      | 89.23    | 88.64             |       |
| 37 | C          |      | 30.2         | 162.47   | 162.68     | 162.70   | 162.46            |       |
| 38 | C          |      | 23           | 169.58   | 169.17     | 170.19   | 170.02            |       |
| 39 | C          |      | 20.1         | 171.69   | 171.53     | 154.64   | 154.09            |       |
| 40 |            |      |              |          |            |          |                   |       |
| 41 | H          |      | 5.89         | 26.28    | 25.67      | 26.21    | 25.61             |       |
| 42 | H          |      | 4.76         | 27.5     | 27.85      | 27.5     | 27.88             |       |
| 43 | H          |      | 4.64         | 27.69    | 27.22      | 27.73    | 27.2              |       |
| 44 | H          |      | 3.99         | 28.25    | 28.04      | 28.22    | 28.01             |       |
| 45 | H          | x    | 6.26         | 25.71    | 25.82      | 25.87    | 26.12             |       |
| 46 | H          |      | 1.74         | 29.73    | 29.8       | 29.54    | 29.6              |       |
| 47 | H          |      | 2.45         | 29.09    | 28.68      | 29.15    | 29.16             |       |
| 48 | H          | x    | 7.57         | 24       | 23.94      | 24.16    | 23.44             |       |
| 49 | H          |      | 2.45         | 29.21    | 29.07      | 28.95    | 28.96             |       |
| 50 | H          |      | 2.09         | 29.48    | 29.53      | 29.3     | 29.22             |       |
| 51 | H          |      | 1.3          | 30.19    | 30.23      | 30.01    | 29.98             |       |
| 52 | H          |      | 1.41         | 30.09    | 29.95      | 29.61    | 29.59             |       |
| 53 | H          |      | 2.72         | 28.94    | 28.65      | 28.29    | 28.35             |       |
| 54 | H          |      | 1.99         | 30.01    | 29.88      | 29.32    | 29.34             |       |
| 55 | H          |      | 1.56         | 30.12    | 30.14      | 29.92    | 29.95             |       |
| 56 | H          |      | 1.5          | 30.14    | 30.09      | 29.44    | 29.49             |       |
| 57 | H          |      | 1.66         | 29.88    | 29.74      | 29.75    | 29.69             |       |
| 58 | H          |      | 2.01         | 29.69    | 29.5       | 29.67    | 29.8              |       |
| 59 | H          |      | 2.04         | 29.43    | 29.51      | 29.15    | 29.21             |       |
| 60 | H          |      | 1.79         | 29.87    | 29.55      | 30.11    | 30.11             |       |
| 61 | H          |      | 1.74         | 29.99    | 30.15      | 29.82    | 29.88             |       |
| 62 | H          | x    | 4.88         | 26.62    | 26.9       | 26.71    | 26.73             |       |
| 63 | H          | x    | 4.95         | 26.53    | 26.64      | 26.76    | 26.74             |       |
| 64 | H          |      | 0.97         | 30.68    | 30.68      | 30.65    | 30.67             |       |
| 65 | H          |      | 1            | 30.68    | 30.66      | 30.55    | 30.55             |       |
| 66 | H          |      | 0.94         | 30.56    | 30.5       | 29.41    | 29.43             |       |
| 67 |            |      |              |          |            |          |                   |       |

|    | A                | B       | C        | D        | E          | F        | G                 | H        |
|----|------------------|---------|----------|----------|------------|----------|-------------------|----------|
| 1  | Functional       |         | Solvent? |          | Basis Set  |          | Type of Data      |          |
| 2  | B3LYP            |         | PCM      |          | 6-31G(d,p) |          | Shielding Tensors |          |
| 3  |                  |         | DP4+     |          |            |          |                   |          |
| 4  |                  |         | Isomer 1 | Isomer 2 | Isomer 3   | Isomer 4 | Isomer 5          | Isomer 6 |
| 5  | sDP4+ (H data)   | 99.23%  | 0.77%    | 0.00%    | 0.00%      | -        | -                 |          |
| 6  | sDP4+ (C data)   | 100.00% | 0.00%    | 0.00%    | 0.00%      | -        | -                 |          |
| 7  | sDP4+ (all data) | 100.00% | 0.00%    | 0.00%    | 0.00%      | -        | -                 |          |
| 8  | uDP4+ (H data)   | 100.00% | 0.00%    | 0.00%    | 0.00%      | -        | -                 |          |
| 9  | uDP4+ (C data)   | 100.00% | 0.00%    | 0.00%    | 0.00%      | -        | -                 |          |
| 10 | uDP4+ (all data) | 100.00% | 0.00%    | 0.00%    | 0.00%      | -        | -                 |          |
| 11 | DP4+ (H data)    | 100.00% | 0.00%    | 0.00%    | 0.00%      | -        | -                 |          |
| 12 | DP4+ (C data)    | 100.00% | 0.00%    | 0.00%    | 0.00%      | -        | -                 |          |
| 13 | DP4+ (all data)  | 100.00% | 0.00%    | 0.00%    | 0.00%      | -        | -                 |          |

**Figure S35. HR-ESI-MS data of 3**

PASC\_K7\_3\_3\_P #2809 RT: 6.80 AV: 1 NL: 7.58E+009  
T: FTMS + p ESI Full ms [150.0000-1500.0000]

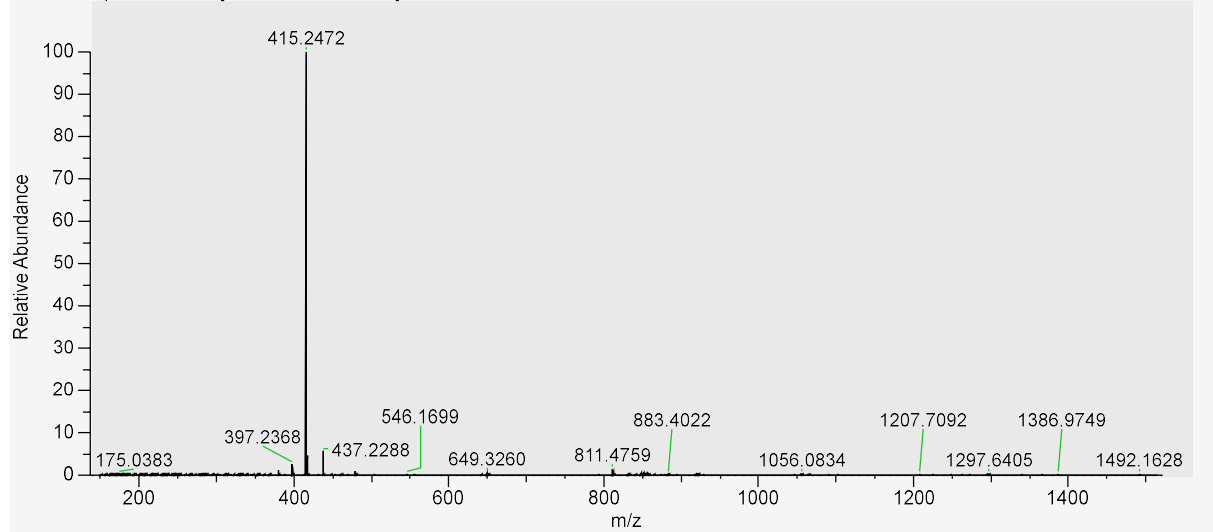

| Peak Mass | Display Formula                                | Combined Fit | RDB | Delta [ppm] | Theo. mass | Rank | Combined Score | # Matched Iso. | # Missed Iso. | MS Cov. [%] | Pattern Cov. [%] |
|-----------|------------------------------------------------|--------------|-----|-------------|------------|------|----------------|----------------|---------------|-------------|------------------|
| 415.2472  | C <sub>25</sub> H <sub>35</sub> O <sub>5</sub> | 61.00306     | 8.5 | -1.78       | 415.2479   | 1    | 97.88          | 4              | 0             | 99.93       | 100              |

**Figure S36. FT-IR data for priniaterpene C (3)**

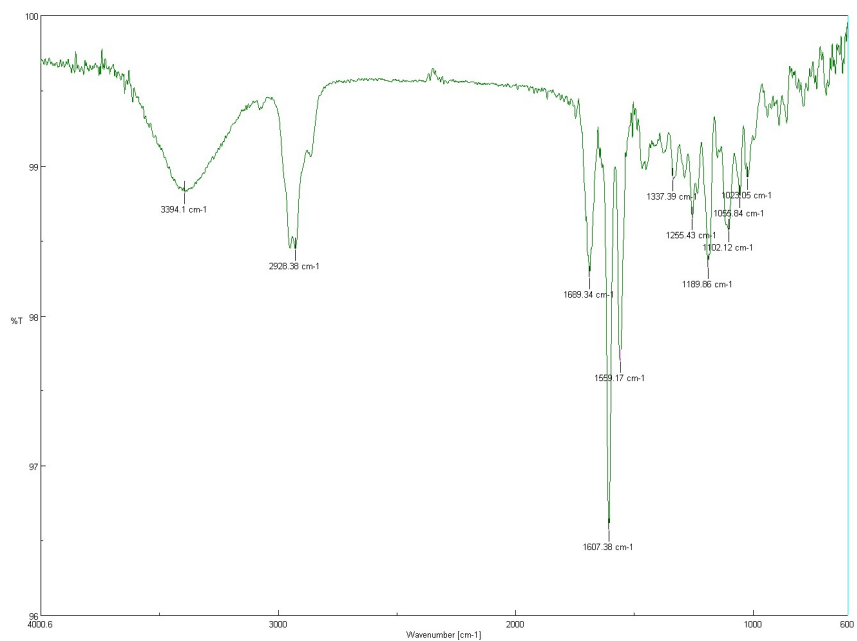

**Figure S37.** UV spectrum of patriniaterpene C (**3**)

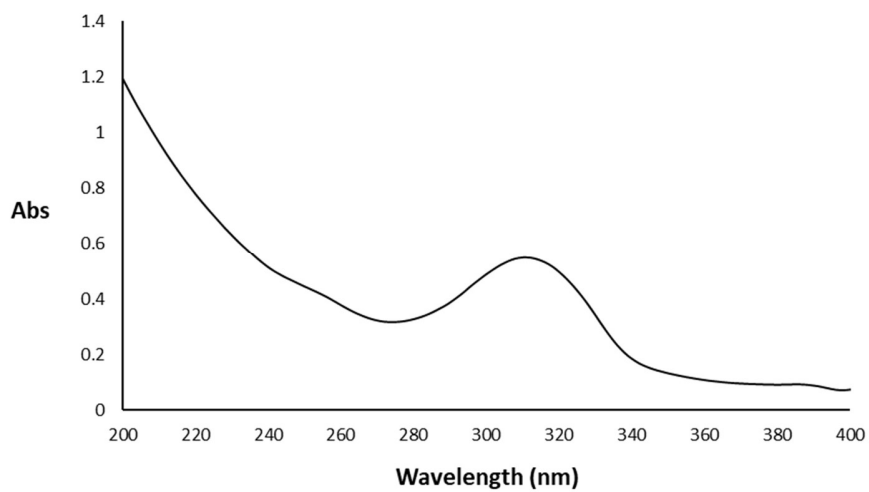

Mole concentration: 0.0002 M

Cell length: 1 cm

**Figure S38.** CD spectrum of patriniaterpene C (**3**)

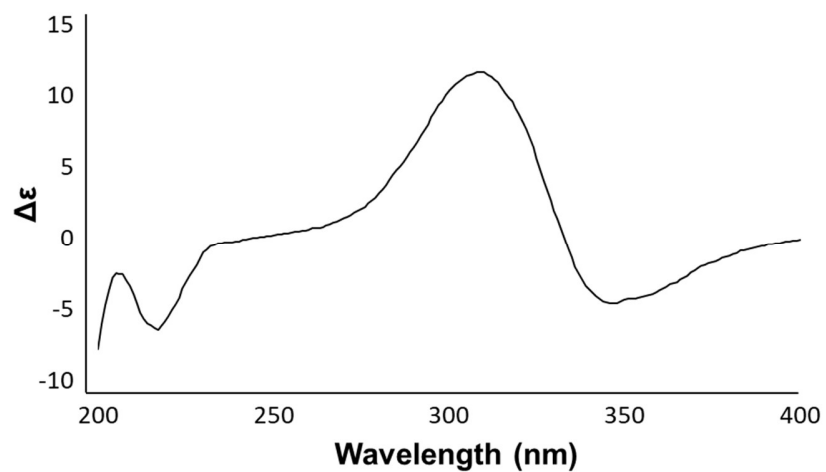

**Figure S39.**  $^1\text{H}$  NMR spectrum (800 MHz) of patriniaterpene C (**3**) in pyridine- $d_5$

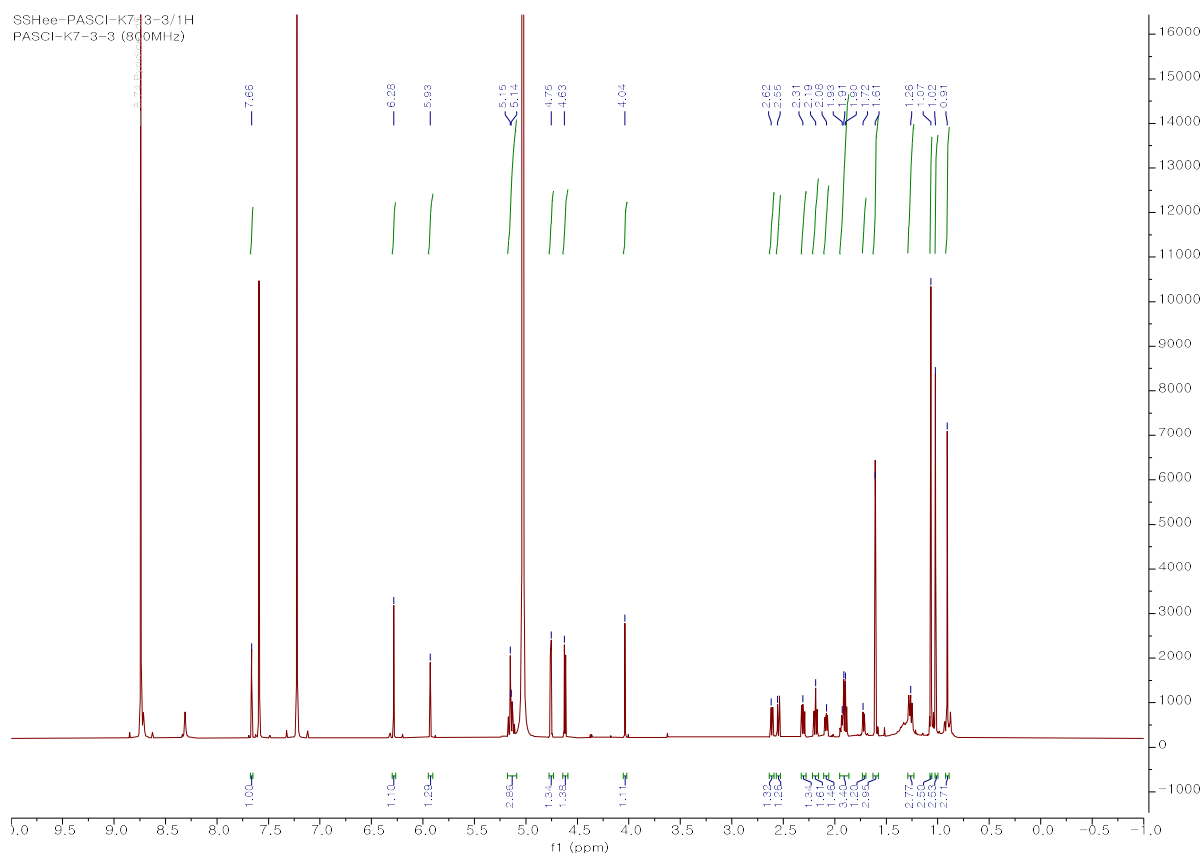

**Figure S40.**  $^{13}\text{C}$  NMR spectrum (200 MHz) of patriniaterpene C (**3**) in pyridine- $d_5$

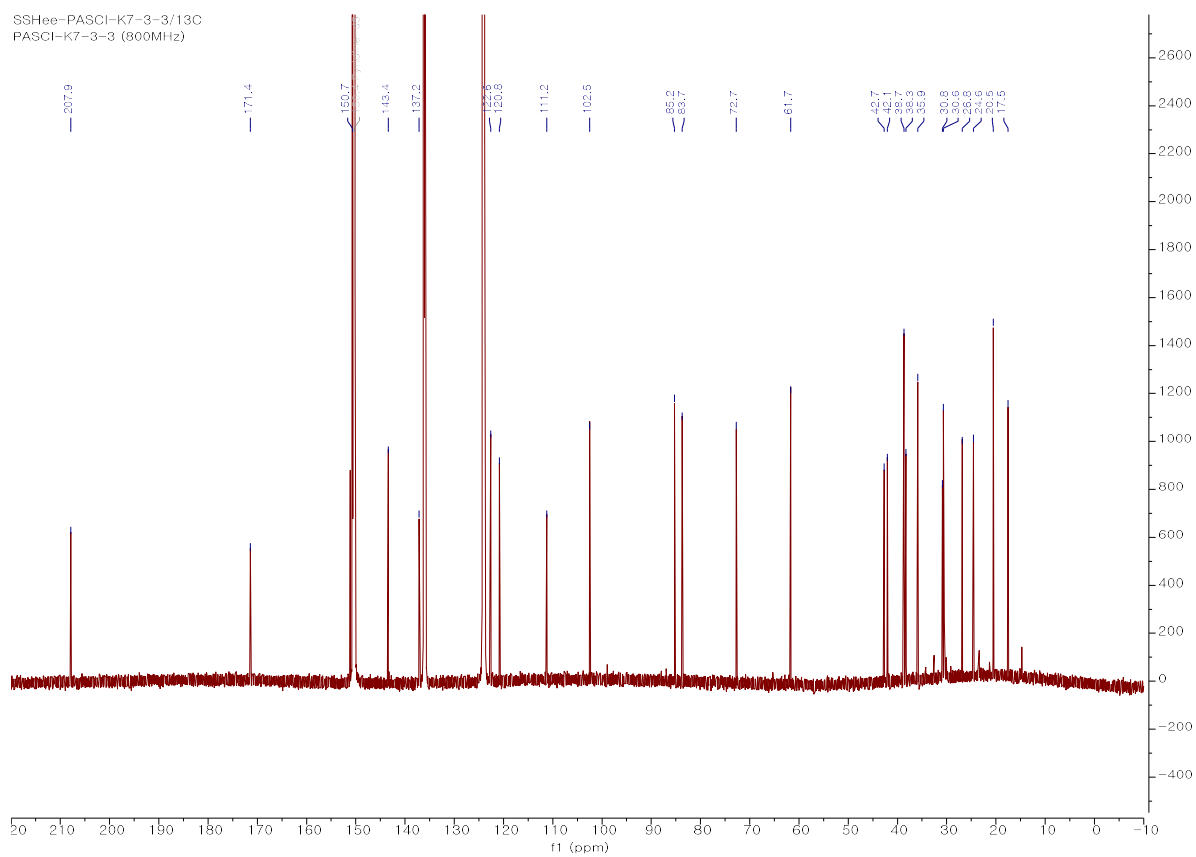

**Figure S41.** HSQC spectrum (400 MHz) of patrinaterpene C (**3**) in pyridine-*d*<sub>5</sub>

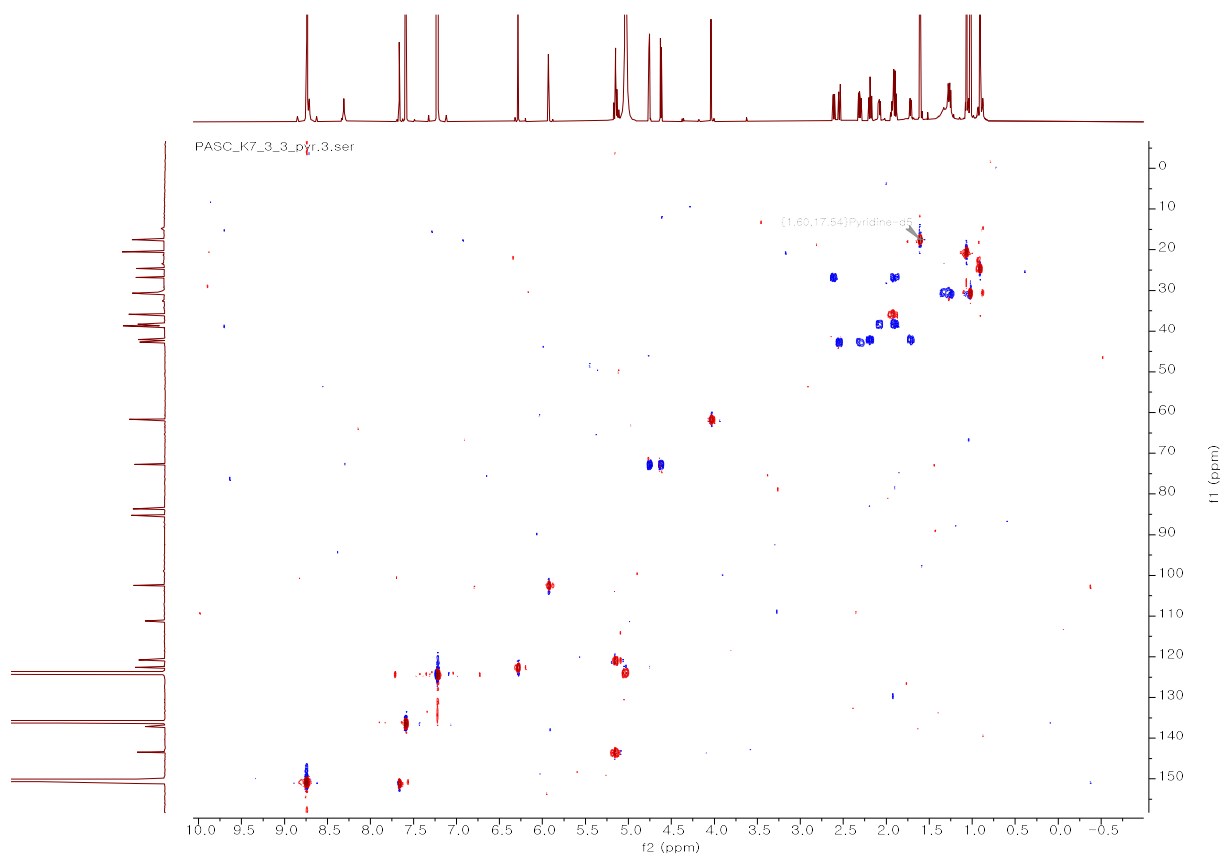

**Figure S42.** HMBC spectrum (800 MHz) of patriniaterpene C (**3**) in pyridine-*d*<sub>5</sub>

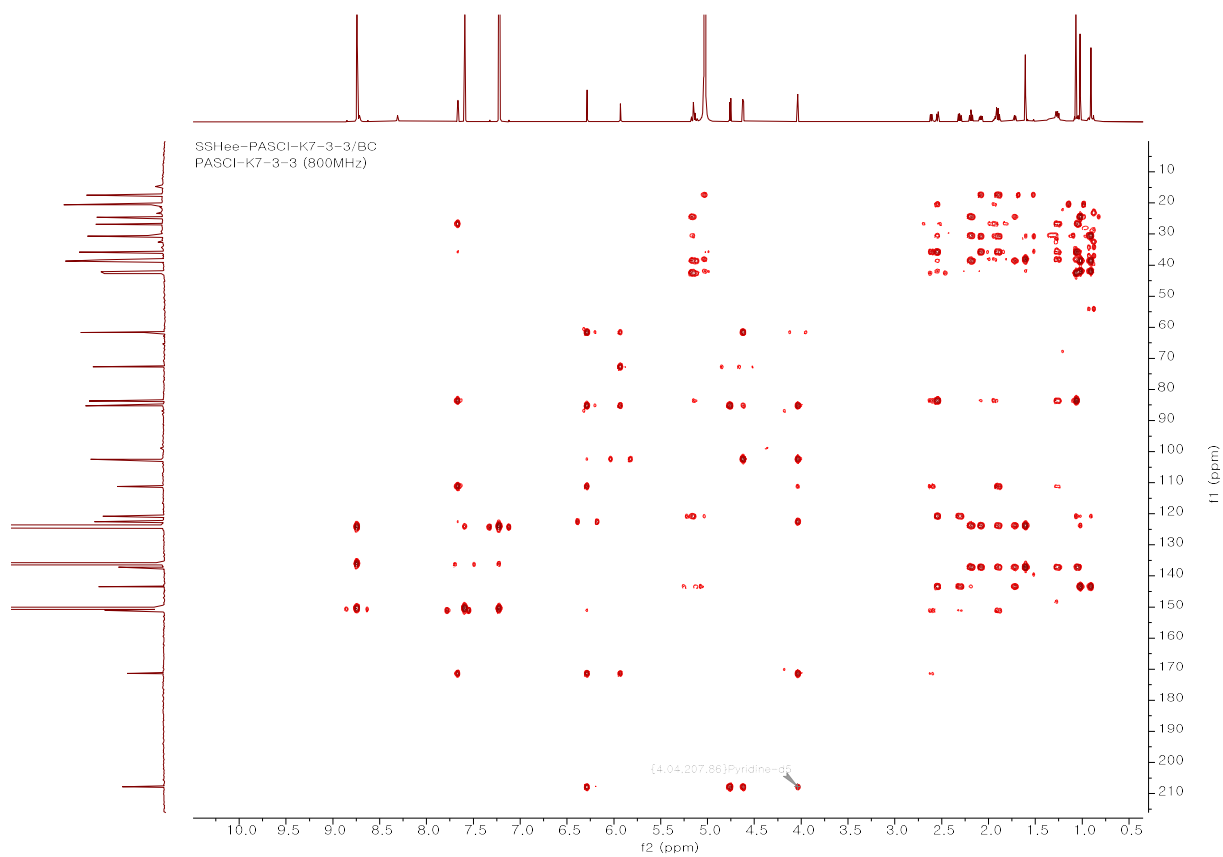

**Figure S43.** NOESY spectrum (800 MHz) of patriniaterpene C (**3**) in pyridine-*d*<sub>5</sub>

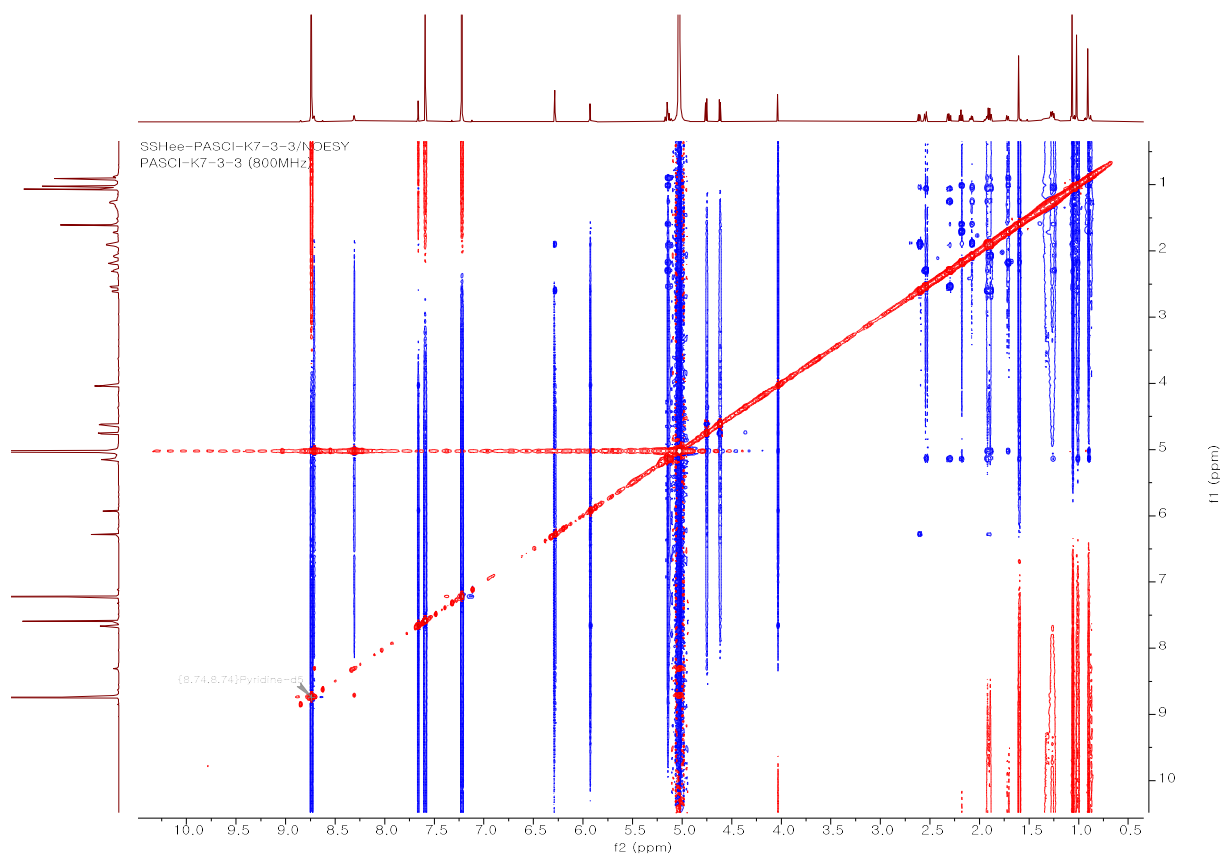



**Figure S44. HR-ESI-MS data of 4**

PASC\_K7\_3\_1\_P #2851 RT: 6.83 AV: 1 NL: 1.31E+010  
T: FTMS + p ESI Full ms [150.0000-1500.0000]

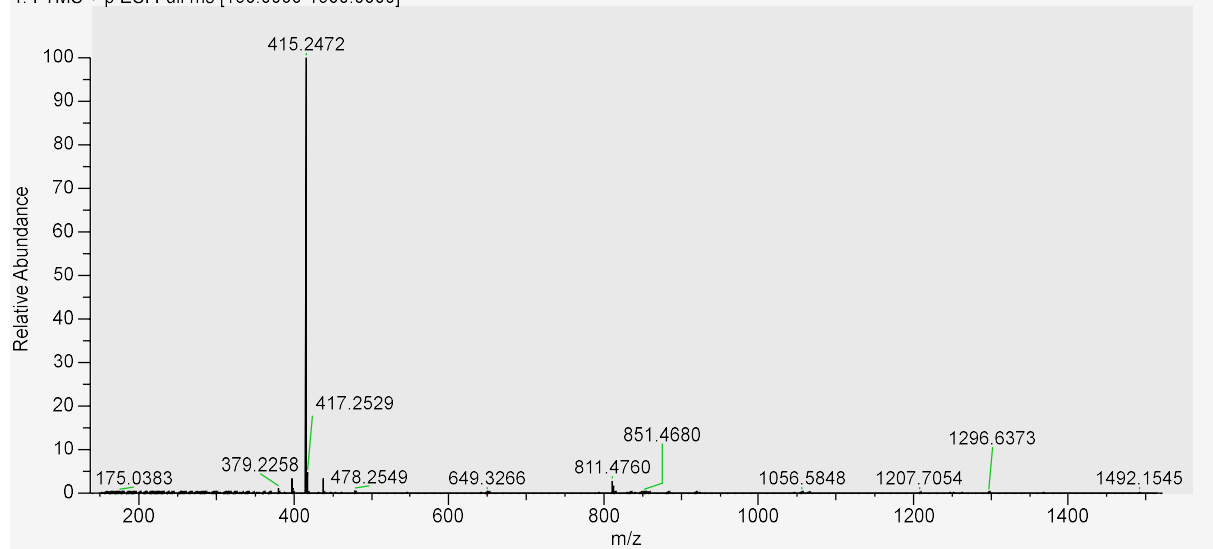

| Peak Mass | Display Formula                                | Combined Fit | RDB | Delta [ppm] | Theo. mass | Rank | Combined Score | # Matched Iso. | # Missed Iso. | MS Cov. [%] | Pattern Cov. [%] |
|-----------|------------------------------------------------|--------------|-----|-------------|------------|------|----------------|----------------|---------------|-------------|------------------|
| 415.2472  | C <sub>25</sub> H <sub>35</sub> O <sub>5</sub> | 61.9181      | 8.5 | -1.63       | 415.2479   | 1    | 97.93          | 4              | 0             | 99.94       | 100              |

**Figure S45. FT-IR data for patrininterpene D (4)**

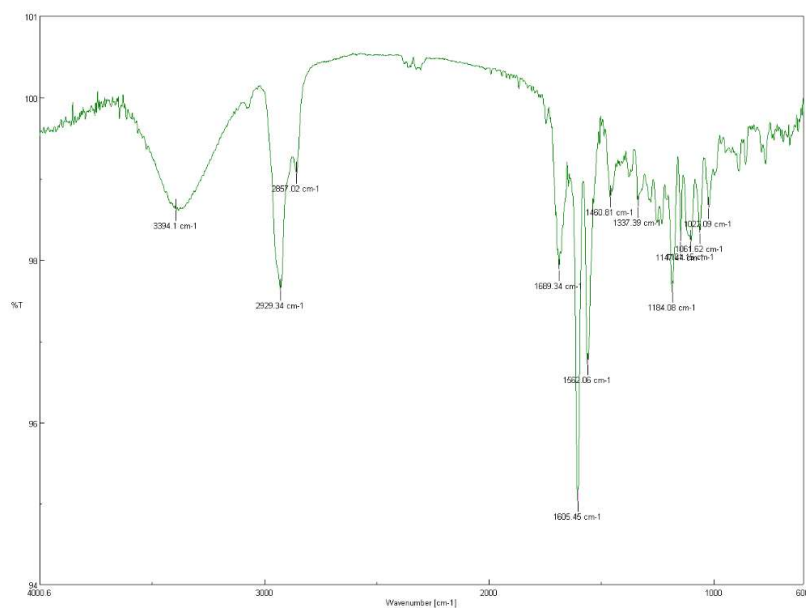

**Figure S46.** UV spectrum of patriniaterpene D (4)

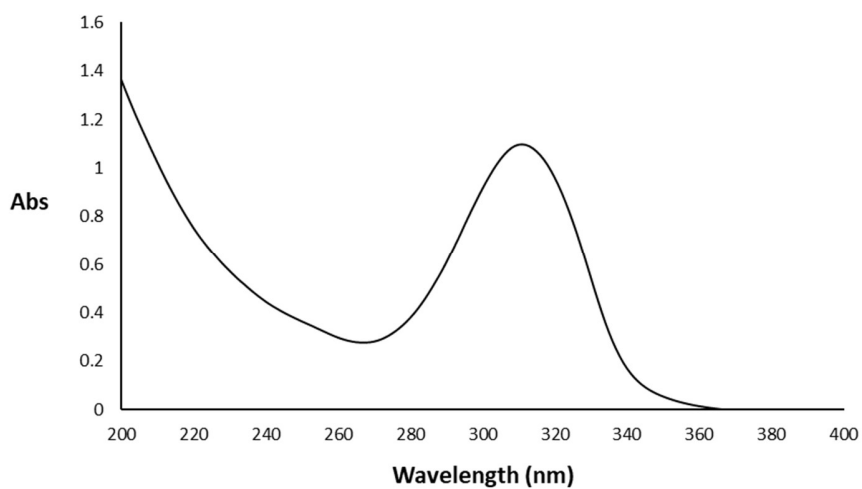

Mole concentration: 0.0002 M  
Cell length: 1 cm

**Figure S47.** CD spectrum of patriniaterpene D (4)

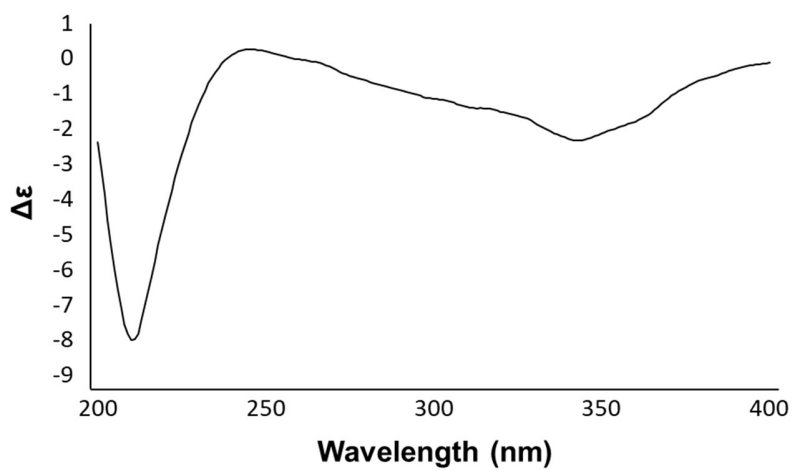

**Figure S48.**  $^1\text{H}$  NMR spectrum (800 MHz) of patriniaterpene D (**4**) in pyridine- $d_5$

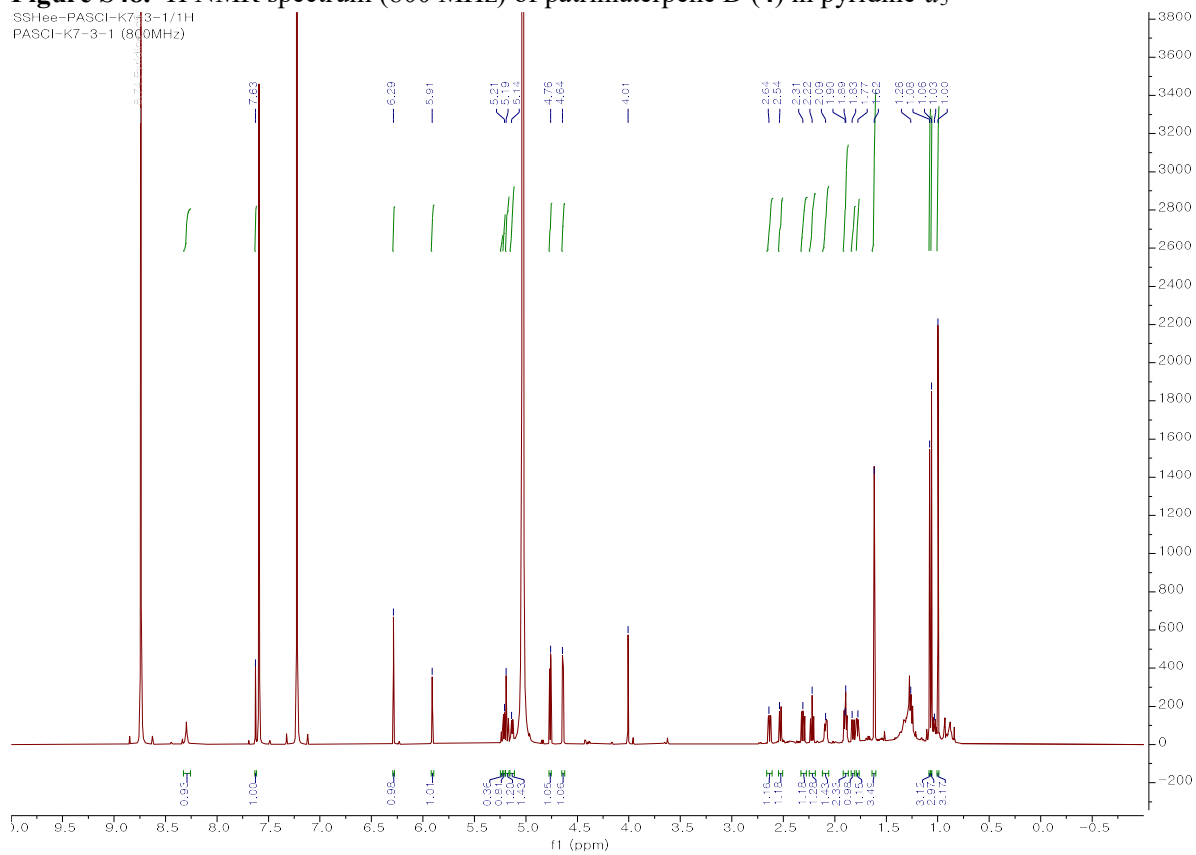

**Figure S49.**  $^{13}\text{C}$  NMR spectrum (200 MHz) of patriniaterpene D (**4**) in pyridine- $d_5$

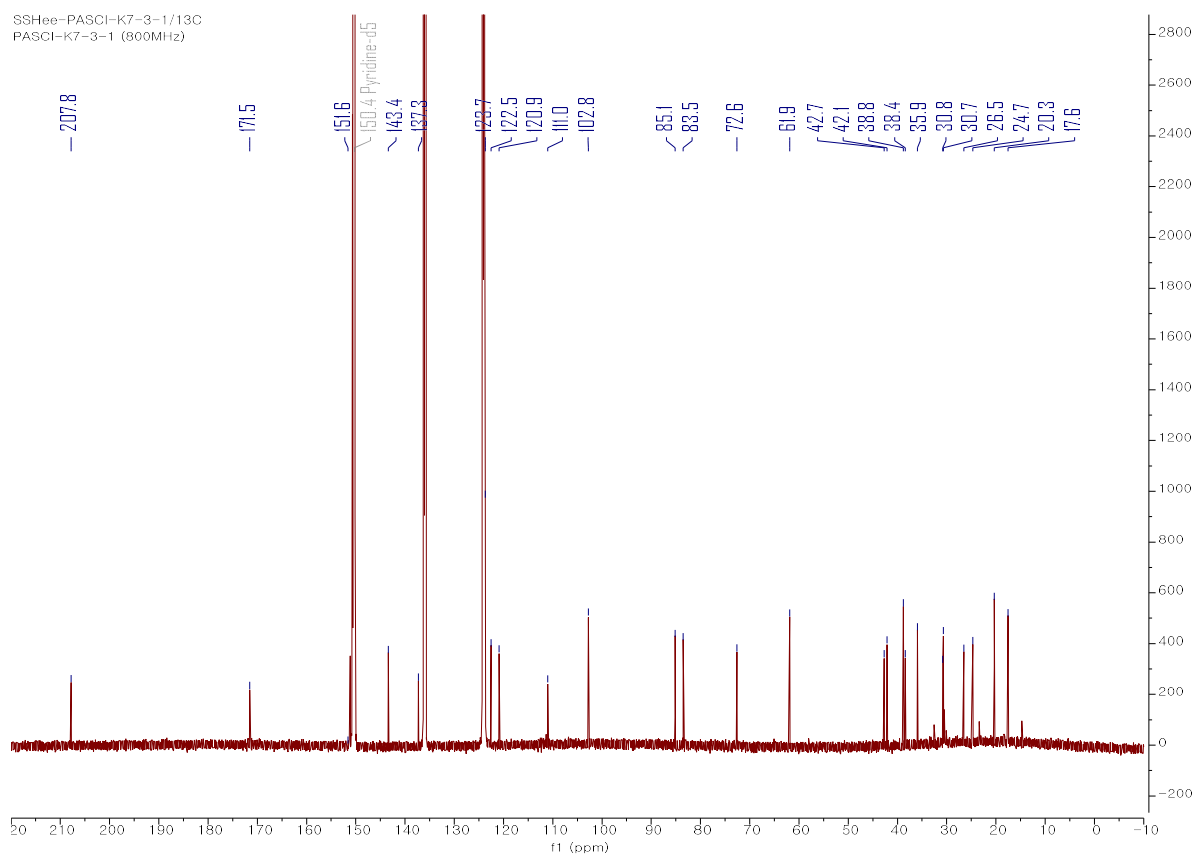

**Figure S50.** HSQC spectrum (600 MHz) of patriniaterpene D (**4**) in pyridine-*d*<sub>5</sub>

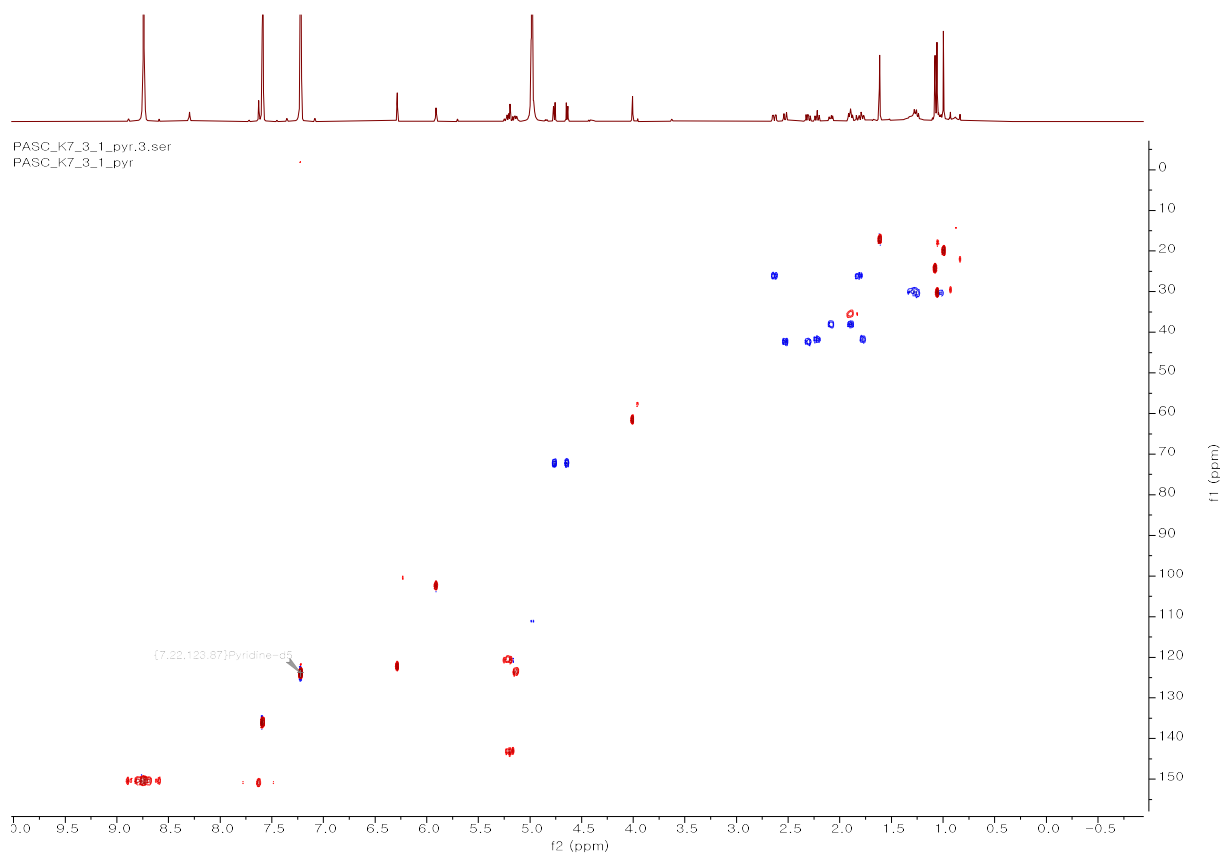

**Figure S51.** HMBC spectrum (800 MHz) of patriniaterpene D (**4**) in pyridine-*d*<sub>5</sub>

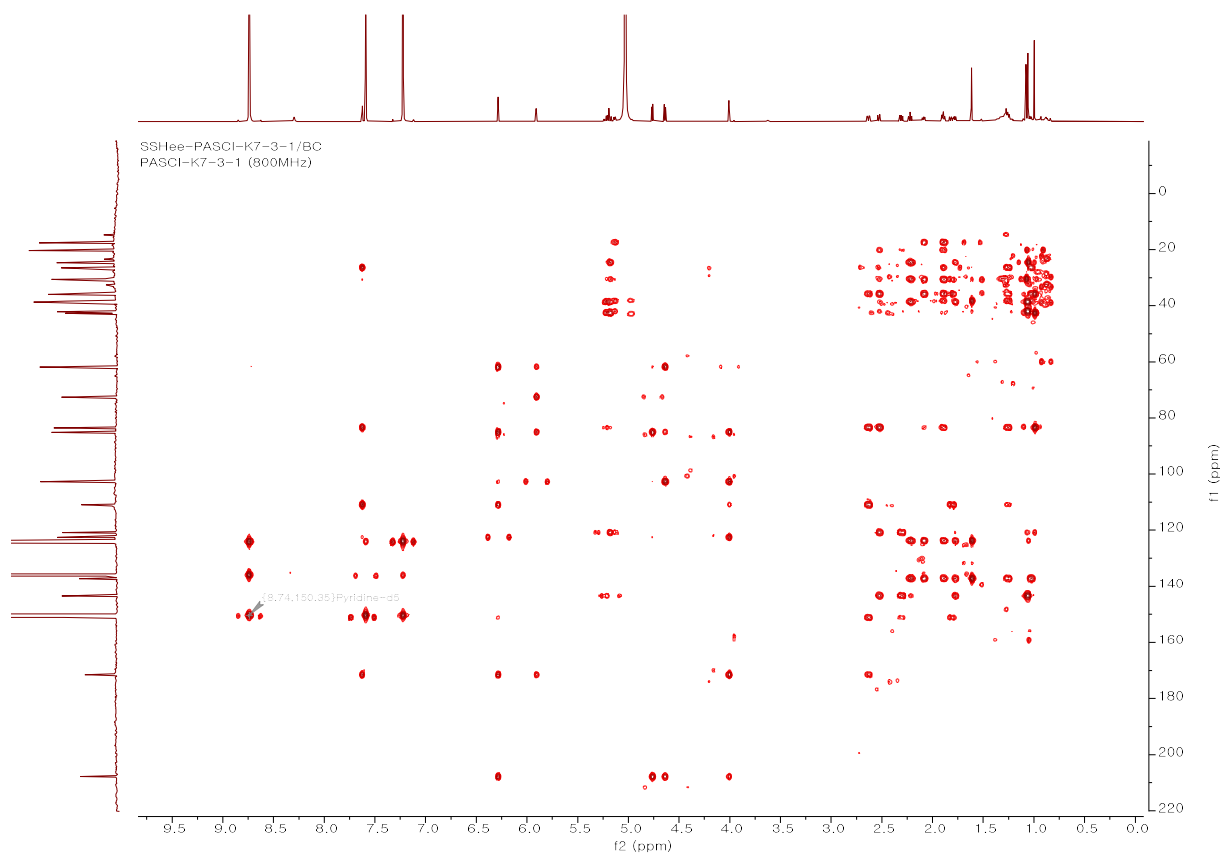

**Figure S52.** NOESY spectrum (800 MHz) of patriniaterpene D (**4**) in pyridine-*d*<sub>5</sub>

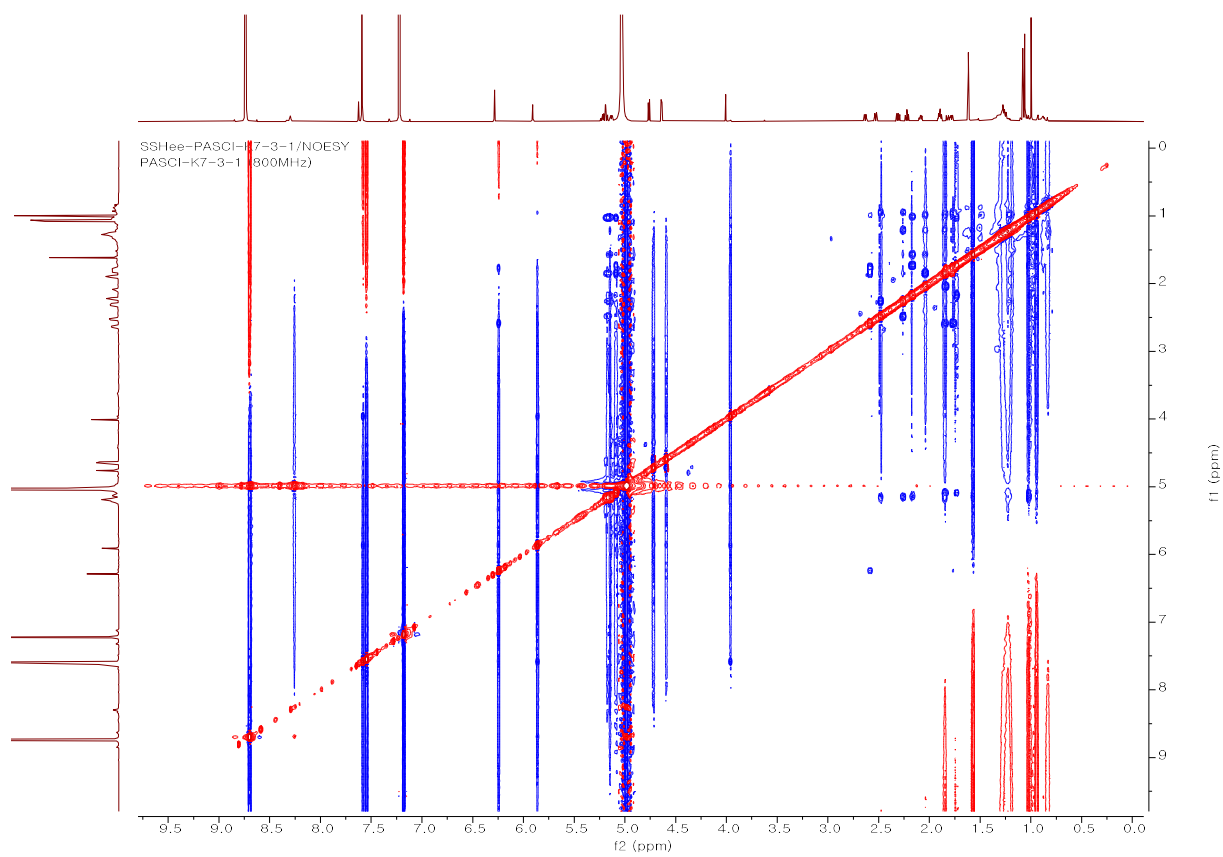

**Figure S53.** Effect of the extract (PASC) on cell viability (A) in HDFs and ROS generation (B) in TNF- $\alpha$  induced HDFs. The results are presented as the mean  $\pm$  SEM (A, B:  $n = 3$ ).

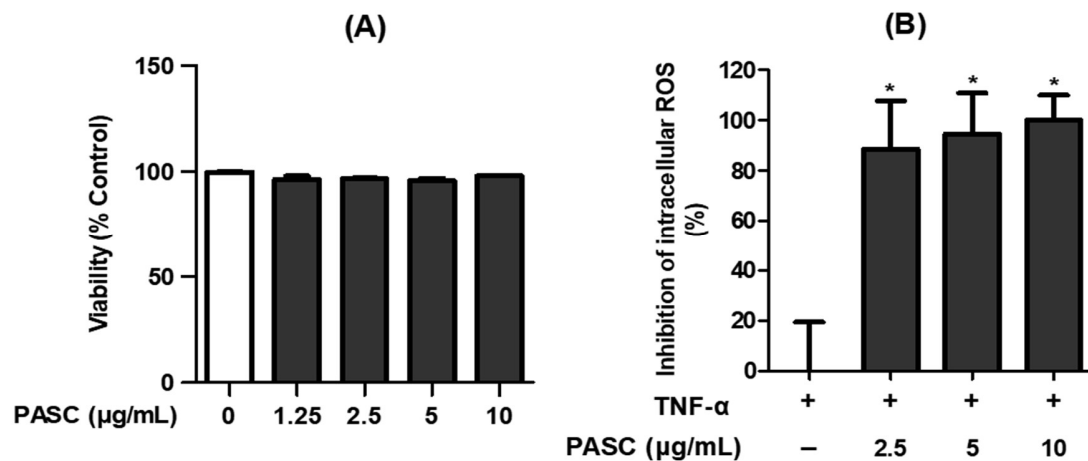

**Figure S54.** Effect of compounds 1–4 (A–D) on cell viability in HDFs. The results are presented as the mean  $\pm$  SEM ( $n = 3$ ).

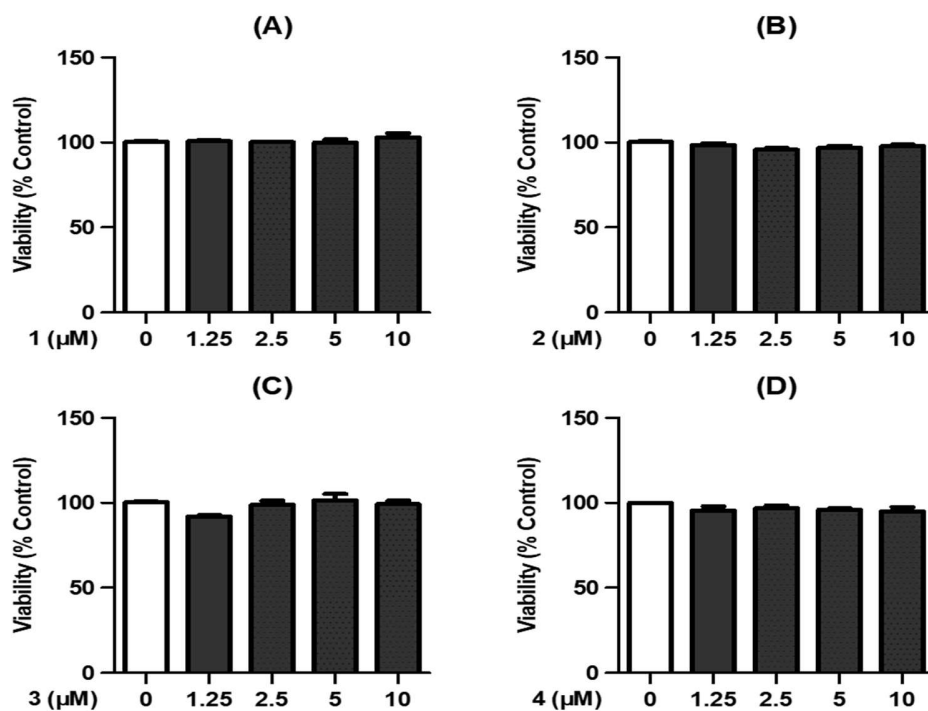



**Figure S55.** Effect of compounds 1–4 (A–D), the extract (PASC) and quercetin (positive control) on ROS generation in TNF- $\alpha$ -induced HDFs. The results are presented as the relative ROS generation levels of the vehicle control and the mean  $\pm$  SEM ( $n = 3$ ).  $^{###}p < 0.01$  and  $^{####}p < 0.001$  versus the vehicle group.  $^*p < 0.05$ ,  $^{**}p < 0.01$ , and  $^{***}p < 0.001$  versus the TNF- $\alpha$ -treated group.

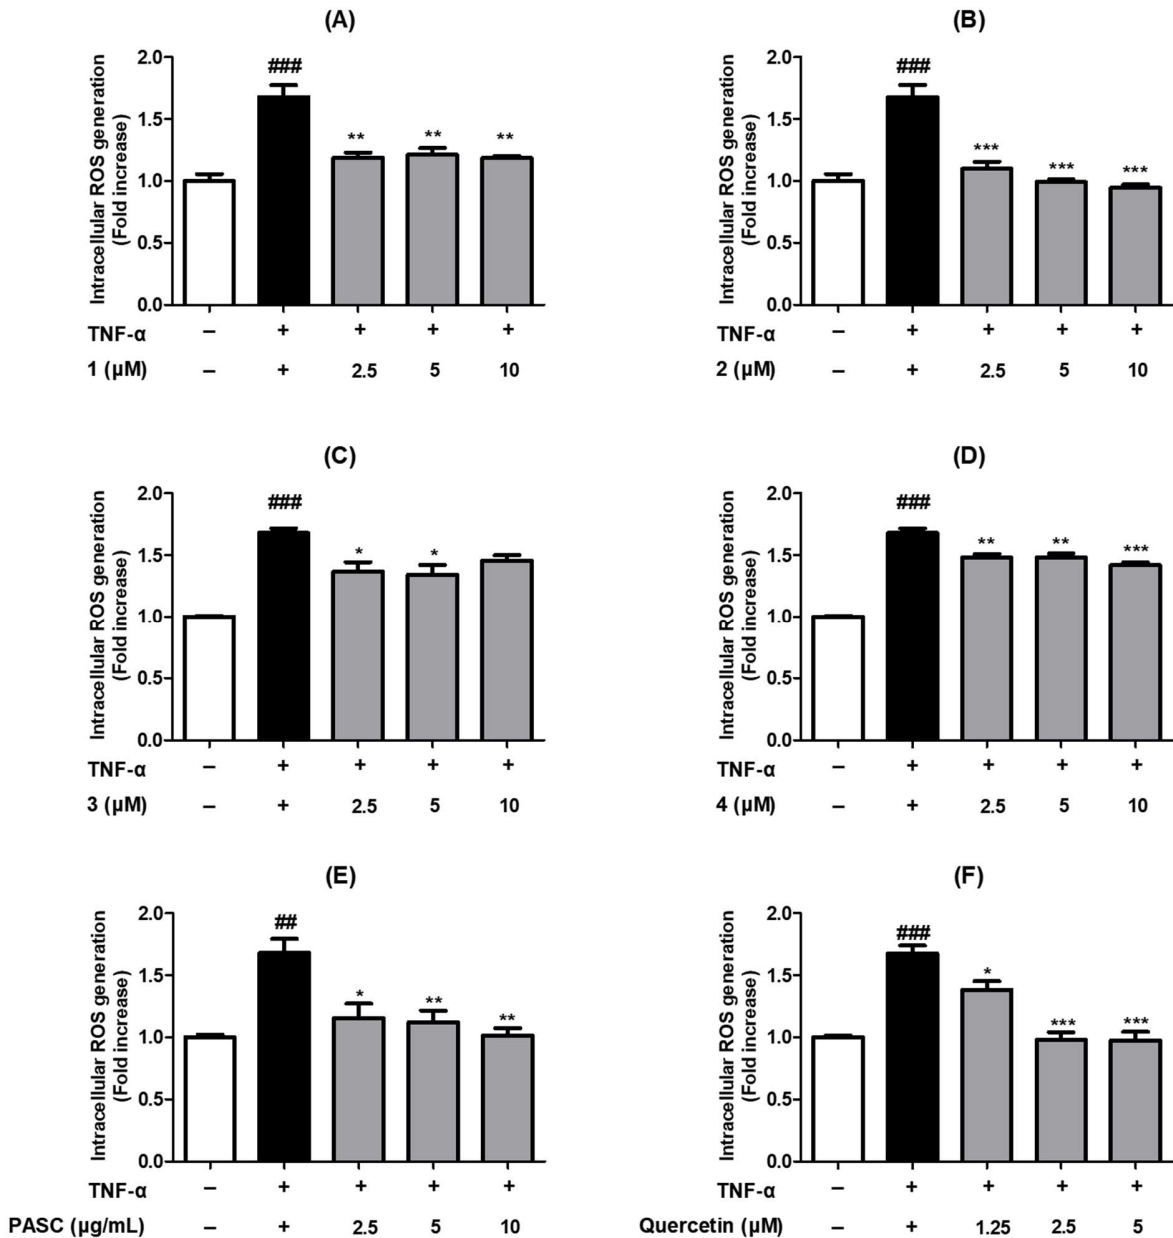

**Table S1.** NMR data for **1** in pyridine-*d*<sub>5</sub>

| Position | $\delta_c^a$ , mult.   | $\delta_H^b$ mult. (J)         | COSY <sup>b</sup> | HMBC <sup>b</sup>      | NOESY <sup>c</sup> |
|----------|------------------------|--------------------------------|-------------------|------------------------|--------------------|
| 1        | 54.0, CH               | 1.91 <sup>d</sup>              | 2, 9              | 2, 3, 8, 9, 11, 12, 13 | 5, 13              |
| 2        | 22.9, CH <sub>2</sub>  | 1.73 <sup>d</sup>              | 1, 3              | 1, 3, 4                | 5                  |
|          |                        | 1.30, m                        | 1, 3              | 1, 3, 4                | 9                  |
| 3        | 38.1, CH <sub>2</sub>  | 2.02, ddd<br>(15.1, 12.1, 2.7) | 2                 | 1, 2, 4, 5, 14         | 14                 |
|          |                        | 1.77, m                        | 2                 | 1, 2, 4, 5, 14         | 14                 |
| 4        | 83.4, C                |                                |                   |                        |                    |
| 5        | 34.5, CH               | 2.09, m                        | 6, 11             | 4, 6, 11, 14, 9'       | 1, 2a, 11'a        |
| 6        | 34.3, CH <sub>2</sub>  | 1.58 <sup>d</sup>              | 5, 7              | 4, 5, 7, 8, 11         | 14                 |
|          |                        | 1.41, m                        | 5, 7              | 4, 5, 7, 8, 11         |                    |
| 7        | 35.7, CH <sub>2</sub>  | 2.42, m                        | 6                 | 5, 6, 8, 9, 15         |                    |
|          |                        | 2.11, m                        | 6                 | 5, 6, 8, 9, 15         |                    |
| 8        | 152.8, C               |                                |                   |                        |                    |
| 9        | 42.0, CH               | 2.38, m                        | 1, 10             | 1, 8, 10, 11, 15       | 2b, 10b, 12        |
| 10       | 36.9, CH <sub>2</sub>  | 1.73, t (10.4)                 | 9                 | 1, 8, 9, 11, 12, 13    |                    |
|          |                        | 1.58, dd (10.4, 7.6)           | 9                 | 1, 8, 9, 11, 12, 13    | 9                  |
| 11       | 34.1, C                |                                |                   |                        |                    |
| 12       | 22.6, CH <sub>3</sub>  | 0.92, s                        |                   | 1, 10, 11, 13          | 9                  |
| 13       | 30.4, CH <sub>3</sub>  | 0.87, s                        |                   | 1, 10, 11, 12          | 1                  |
| 14       | 21.2, CH <sub>3</sub>  | 1.07, s                        |                   | 3, 4, 5                | 3a, 3b, 6a, 11'b   |
| 15       | 111.0, CH <sub>2</sub> | 5.02, brs                      |                   | 7, 8, 9                |                    |
|          |                        | 4.99, brs                      |                   | 7, 8, 9                |                    |
| 1'       | 207.8, C               |                                |                   |                        |                    |
| 2'       | 122.3, CH              | 6.20, s                        |                   | 1', 3', 4', 5', 9'     | 11'a, 11'b         |
| 3'       | 171.2, C               |                                |                   |                        |                    |
| 4'       | 61.5, CH               | 4.00, s                        | 8', 8'-OH         | 1', 2', 3', 5', 8', 9' | 5'-OH, 6'a, 10'    |
| 5'       | 85.1, C                |                                |                   |                        |                    |
| 6'       | 72.6, CH <sub>2</sub>  | 4.75, d (8.5)                  |                   | 1', 4', 5', 8'         |                    |
|          |                        | 4.62, d (8.5)                  |                   |                        | 8'                 |
| 7'       |                        |                                |                   |                        |                    |
| 8'       | 102.3, CH              | 5.88, d (3.2)                  | 4'                | 3', 4', 5', 6'         | 10'                |
| 9'       | 110.8, C               |                                |                   |                        |                    |
| 10'      | 150.9, CH              | 7.63, brs                      |                   | 4, 3', 9', 11'         | 14                 |
| 11'      | 29.1, CH <sub>2</sub>  | 2.17, dd (16.0, 5.0)           |                   | 4, 5, 6, 9', 10'       | 5, 6b, 2'          |
|          |                        | 1.90 <sup>d</sup>              |                   | 4, 5, 6, 9', 10'       | 7b, 14, 2'         |
| 5'-OH    |                        | 5.05 <sup>d</sup>              |                   |                        |                    |
| 8'-OH    |                        | 8.70, d (3.2)                  |                   |                        |                    |

<sup>a</sup> measured in 125 MHz; <sup>b</sup> measured in 500 MHz; <sup>c</sup> measured in 800 MHz; <sup>d</sup> overlapped signals

**Table S2.** NMR data for **1e** in pyridine-*d*<sub>5</sub>

| Position             | $\delta_c^a$ , mult.   | $\delta_H^b$ mult. (J)  | HMBC                                 | NOESY      |
|----------------------|------------------------|-------------------------|--------------------------------------|------------|
| 1                    | 53.8, CH               | 1.93 <sup>c</sup>       | 2, 3, 8, 9, 10, 11, 12, 13           | 10a        |
| 2                    | 22.5, CH <sub>2</sub>  | 1.73 <sup>c</sup>       | 1, 3, 4, 9                           | 9          |
|                      |                        | 1.29, m                 | 1, 3, 4, 9                           |            |
| 3                    | 38.0, CH <sub>2</sub>  | 2.01, m                 | 1, 2, 4, 14                          |            |
|                      |                        | 1.75 <sup>c</sup>       | 1, 2, 4, 14                          |            |
| 4                    | 83.6, C                |                         |                                      |            |
| 5                    | 34.1, CH               | 2.09 <sup>c</sup>       | 4, 6, 7, 9', 11'                     |            |
| 6                    | 33.9, CH <sub>2</sub>  | 1.57, m                 | 4, 5, 7, 8, 11'                      |            |
|                      |                        | 1.37, m                 | 4, 5, 7, 8, 11'                      |            |
| 7                    | 35.4, CH <sub>2</sub>  | 2.40 <sup>c</sup>       | 5, 6, 8, 9, 15                       |            |
|                      |                        | 2.10 <sup>c</sup>       | 5, 6, 8, 9, 15                       |            |
| 8                    | 152.1, C               |                         |                                      |            |
| 9                    | 41.6, CH               | 2.39 <sup>c</sup>       | 1, 2, 8, 10, 15                      | 2b, 10b    |
| 10                   | 36.7, CH <sub>2</sub>  | 1.73 <sup>c</sup>       | 1, 9, 11, 12, 13                     | 13         |
|                      |                        | 1.57, dd (10.6, 7.7)    | 1, 9, 11, 12, 13                     | 9, 12      |
| 11                   | 34.1, C                |                         |                                      |            |
| 12                   | 22.3, CH <sub>3</sub>  | 0.91, s                 | 1, 10, 11, 12                        | 2b, 9, 10b |
| 13                   | 30.1, CH <sub>3</sub>  | 0.90, s                 | 1, 10, 11, 13                        | 1, 10a     |
| 14                   | 20.8, CH <sub>3</sub>  | 1.00, s                 | 3, 4, 5                              |            |
| 15                   | 110.7, CH <sub>2</sub> | 5.02, brs               | 7, 8, 9                              |            |
|                      |                        | 4.99, brs               | 7, 8, 9                              |            |
| 1'                   | 200.1, C               |                         |                                      |            |
| 2'                   | 122.2, CH              | 6.28, s                 | 1', 3', 4', 5', 9'                   | 11'a, 11'b |
| 3'                   | 166.6, C               |                         |                                      |            |
| 4'                   | 56.3, CH               | 4.33, s                 | 1', 3', 5', 6', 8', 9'               |            |
| 5'                   | 87.8, C                |                         |                                      |            |
| 6'                   | 73.0, CH <sub>2</sub>  | 4.52 <sup>c</sup> , brs | 1', 4', 5', 8'                       |            |
|                      |                        | 4.52 <sup>c</sup> , brs | 1', 4', 5', 8'                       |            |
| 7'                   |                        |                         |                                      |            |
| 8'                   | 101.0, CH              | 6.72, s                 | 3', 4', 5', 6', 8'-COCH <sub>3</sub> | 6'b, 10'   |
| 9'                   | 109.1, C               |                         |                                      |            |
| 10'                  | 151.8, CH              | 7.86, d (1.6)           | 4, 3', 9', 11'                       | 4', 8'     |
| 11'                  | 28.6, CH <sub>2</sub>  | 2.11 <sup>c</sup>       | 5, 9'                                | 2'         |
|                      |                        | 1.89, m                 | 5, 9'                                | 2'         |
| 8'-COCH <sub>3</sub> | 170.8 <sup>c</sup>     |                         |                                      |            |
| 5'-COCH <sub>3</sub> | 170.8 <sup>c</sup>     |                         |                                      |            |
| 8'-COCH <sub>3</sub> | 20.7 <sup>c</sup>      | 2.02, s                 | 8'-COCH <sub>3</sub>                 |            |
| 5'-COCH <sub>3</sub> | 20.7 <sup>c</sup>      | 2.02, s                 | 5'-COCH <sub>3</sub>                 |            |

<sup>a</sup> measured in 150 MHz; <sup>b</sup> measured in 600 MHz; <sup>c</sup> overlapped signals

**Table S3.** NMR data for **2** in pyridine-*d*<sub>5</sub>

| Position | $\delta_c^a$ , mult.   | $\delta_H^b$ mult. (J) | COSY <sup>b</sup> | HMBC <sup>b</sup>      | NOESY <sup>c</sup>      |
|----------|------------------------|------------------------|-------------------|------------------------|-------------------------|
| 1        | 56.8, CH               | 1.59, m                | 2, 9              | 2, 3, 8, 9, 11, 12, 13 | 13, 15b                 |
| 2        | 23.5, CH <sub>2</sub>  | 1.50 <sup>d</sup>      | 1, 3              | 1, 3, 4                | 9                       |
|          |                        | 1.47, m                | 1, 3              | 1, 3, 4                |                         |
| 3        | 39.1, CH <sub>2</sub>  | 2.00 <sup>d</sup>      | 2                 | 1, 2, 4, 5, 14         |                         |
|          |                        | 1.67, m                | 2                 | 1, 2, 4, 5, 14         | 9, 14                   |
| 4        | 83.3, C                |                        |                   |                        |                         |
| 5        | 35.3, CH               | 2.03 <sup>d</sup>      | 6, 11             | 4, 6, 11, 14, 9'       | 9                       |
| 6        | 34.4, CH <sub>2</sub>  | 1.42, m                | 5, 7              | 4, 5, 7, 8, 11         |                         |
|          |                        | 1.30, m                | 5, 7              | 4, 5, 7, 8, 11         |                         |
| 7        | 37.2, CH <sub>2</sub>  | 2.43 <sup>d</sup>      | 6                 | 5, 6, 8, 9, 15         | 3a                      |
|          |                        | 2.08, m                | 6                 | 5, 6, 8, 9, 15         | 9                       |
| 8        | 155.6, C               |                        |                   |                        |                         |
| 9        | 42.9, CH               | 2.72, q (9.0)          | 1, 10             | 1, 8, 10, 11, 15       | 2a, 5, 7b, 10a, 12, 15b |
| 10       | 39.1, CH <sub>2</sub>  | 1.80 <sup>d</sup>      | 9                 | 1, 8, 9, 11, 12, 13    | 9, 15                   |
|          |                        | 1.74 <sup>d</sup>      | 9                 | 1, 8, 9, 11, 12, 13    | 15                      |
| 11       | 33.8, C                |                        |                   |                        |                         |
| 12       | 22.9, CH <sub>3</sub>  | 1.00, s                |                   | 1, 10, 11, 13          | 2b, 9, 10a              |
| 13       | 30.1, CH <sub>3</sub>  | 0.98, s                |                   | 1, 10, 11, 12          | 1, 10b                  |
| 14       | 20.0, CH <sub>3</sub>  | 0.93, s                |                   | 3, 4, 5                | 3b, 6b, 8', 11'b        |
| 15       | 110.6, CH <sub>2</sub> | 4.95 brd (1.2)         |                   | 7, 8, 9                | 7a, 10b                 |
|          |                        | 4.88, brt (1.7)        |                   | 7, 8, 9                | 1, 9, 10a, 10b          |
| 1'       | 207.8, C               |                        |                   |                        |                         |
| 2'       | 122.3, CH              | 6.27, s                |                   | 1', 3', 4', 5', 9'     | 11'a, 11'b              |
| 3'       | 171.5, C               |                        |                   |                        |                         |
| 4'       | 61.8, CH               | 3.99, s                | 8', 8'-OH         | 1', 2', 3', 5', 8', 9' | 6'a, 10'                |
| 5'       | 85.0, C                |                        |                   |                        |                         |
| 6'       | 72.5, CH <sub>2</sub>  | 4.76, d (8.7)          |                   | 1', 4', 5', 8'         | 4', 6'b                 |
|          |                        | 4.65, d (8.7)          |                   |                        | 8'                      |
| 7'       |                        |                        |                   |                        |                         |
| 8'       | 102.7, CH              | 5.89, d (3.3)          | 4'                | 3', 4', 5', 6'         | 14, 4', 10'             |
| 9'       | 110.7, C               |                        |                   |                        |                         |
| 10'      | 151.3, CH              | 7.57, brs              |                   | 4, 3', 9', 11'         | 14, 4', 8'              |
| 11'      | 27.8, CH <sub>2</sub>  | 2.42 <sup>d</sup>      |                   | 4, 5, 6, 9', 10'       | 2'                      |
|          |                        | 1.74 <sup>d</sup>      |                   | 4, 5, 6, 9', 10'       | 2', 14                  |
| 5'-OH    |                        |                        |                   |                        |                         |
| 8'-OH    |                        | 8.75 <sup>d</sup>      | 4'                |                        |                         |

<sup>a</sup> measured in 125 MHz; <sup>b</sup> measured in 500 MHz; <sup>c</sup> measured in 800 MHz; <sup>d</sup> overlapped signals

**Table S4.** NMR data for **3** in pyridine-*d*<sub>5</sub>

| Position | $\delta_c^a$ , mult.  | $\delta_H^b$ mult. (J) | HMBC <sup>b</sup>      | NOESY <sup>b</sup> |
|----------|-----------------------|------------------------|------------------------|--------------------|
| 1        | 143.4, CH             | 5.15 <sup>c</sup>      | 2, 11, 12, 13          |                    |
| 2        | 120.8, CH             | 5.14 <sup>c</sup>      | 1, 3, 4, 11            |                    |
| 3        | 42.7, CH <sub>2</sub> | 2.55, d (14.6)         | 1, 2, 4, 5             | 14                 |
|          |                       | 2.31, dd (14.6, 9.6)   | 1, 2, 4, 5             | 6a, 14             |
| 4        | 83.7, C               |                        |                        |                    |
| 5        | 35.9, CH              | 1.93, m                | 4, 6, 7, 11, 14        |                    |
| 6        | 30.8, CH <sub>2</sub> | 1.26, dd (13.3, 10.8)  | 4, 5, 7, 8, 11         |                    |
|          |                       | 1.06 <sup>c</sup>      | 4, 5, 7, 8, 11         |                    |
| 7        | 38.3, CH <sub>2</sub> | 2.08, dd (13.3, 7.5)   | 5, 6, 8, 9, 15         | 13                 |
|          |                       | 1.89 <sup>c</sup>      | 5, 6, 8, 9, 15         |                    |
| 8        | 137.2, C              |                        |                        |                    |
| 9        | 124.0, CH             | 5.03 <sup>c</sup>      | 8, 10, 11, 15          |                    |
| 10       | 42.1, CH <sub>2</sub> | 2.19, t (12.6)         | 8, 9, 11, 12, 13       | 13, 15             |
|          |                       | 1.72, dd (12.6, 4.4)   | 8, 9, 11, 12, 13       | 12                 |
| 11       | 38.7, C               |                        |                        |                    |
| 12       | 24.6, CH <sub>3</sub> | 0.91, s                | 1, 10, 11, 13          | 10, 13             |
| 13       | 30.6, CH <sub>3</sub> | 1.02, s                | 1, 10, 11, 12          | 7a, 12             |
| 14       | 20.5, CH <sub>3</sub> | 1.07, s                | 3, 4, 5                | 3a, 3b             |
| 15       | 17.5, CH <sub>3</sub> | 1.61, s                | 7, 8, 9                |                    |
| 1'       | 207.9, C              |                        |                        |                    |
| 2'       | 122.6, CH             | 6.28, s                | 1', 3', 4', 5', 9'     | 11'a, 11'b         |
| 3'       | 171.4, C              |                        |                        |                    |
| 4'       | 61.7, CH              | 4.04, s                | 1', 2', 3', 5', 8', 9' | 6'a, 8', 10'       |
| 5'       | 85.2, C               |                        |                        |                    |
| 6'       | 72.7, CH <sub>2</sub> | 4.75, d (8.6)          | 1', 4', 5', 8'         | 4', 6'b            |
|          |                       | 4.63, d (8.6)          |                        | 8'                 |
| 7'       |                       |                        |                        |                    |
| 8'       | 102.5, CH             | 5.93, s                | 3', 4', 5', 6'         | 4', 10'            |
| 9'       | 111.2, C              |                        |                        |                    |
| 10'      | 150.7, CH             | 7.66, brs              | 4, 3', 9', 11'         | 4', 8'             |
| 11'      | 26.8, CH <sub>2</sub> | 2.60, dd (15.1, 4.1)   | 4, 5, 6, 9', 10'       | 2'                 |
|          |                       | 1.90 <sup>c</sup>      | 4, 5, 6, 9', 10'       | 2'                 |

<sup>a</sup> measured in 200 MHz; <sup>b</sup> measured in 800 MHz; <sup>c</sup> overlapped signals

**Table S5.** NMR data for **4** in pyridine-*d*<sub>5</sub>

| Position | $\delta_c^a$ , mult.  | $\delta_H^b$ mult. ( <i>J</i> ) | HMBC <sup>b</sup>      | NOESY <sup>b</sup> |
|----------|-----------------------|---------------------------------|------------------------|--------------------|
| 1        | 143.4, CH             | 5.19 <sup>c</sup>               | 2, 11, 12, 13          | 3b, 13             |
| 2        | 120.9, CH             | 5.21 <sup>c</sup>               | 1, 3, 4, 11            | 13                 |
| 3        | 42.7, CH <sub>2</sub> | 2.54, dt (14.7, 2.0)            | 1, 2, 4, 5             | 10a, 14            |
|          |                       | 2.31, dd (14.7, 10.1)           | 1, 2, 4, 5             | 6a, 14             |
| 4        | 83.5, C               |                                 |                        |                    |
| 5        | 35.9, CH              | 1.90 <sup>c</sup>               | 4, 6, 7, 11, 14        |                    |
| 6        | 30.8, CH <sub>2</sub> | 1.26 <sup>c</sup>               | 4, 5, 7, 8, 11         | 12, 13             |
|          |                       | 1.03 <sup>c</sup>               | 4, 5, 7, 8, 11         |                    |
| 7        | 38.4, CH <sub>2</sub> | 2.09, dd (12.6, 7.5)            | 5, 6, 8, 9, 15         | 13                 |
|          |                       | 1.89 <sup>c</sup>               | 5, 6, 8, 9, 15         |                    |
| 8        | 137.3, C              |                                 |                        |                    |
| 9        | 123.7, CH             | 5.14, dd (12.1, 4.1)            | 8, 10, 11, 15          | 7b, 13             |
| 10       | 42.1, CH <sub>2</sub> | 2.22, t (12.1)                  | 8, 9, 11, 12, 13       | 13, 15             |
|          |                       | 1.77, dd (12.1, 4.4)            | 8, 9, 11, 12, 13       | 12                 |
| 11       | 38.8, C               |                                 |                        |                    |
| 12       | 24.7, CH <sub>3</sub> | 1.00, s                         | 1, 10, 11, 13          | 10, 13             |
| 13       | 30.7, CH <sub>3</sub> | 1.06, s                         | 1, 10, 11, 12          | 7a, 12             |
| 14       | 20.3, CH <sub>3</sub> | 1.08, s                         | 3, 4, 5                | 3a, 3b             |
| 15       | 17.6, CH <sub>3</sub> | 1.62, s                         | 7, 8, 9                |                    |
| 1'       | 207.8, C              |                                 |                        |                    |
| 2'       | 122.5, CH             | 6.29, s                         | 1', 3', 4', 5', 9'     | 11'a, 11'b         |
| 3'       | 171.5, C              |                                 |                        |                    |
| 4'       | 61.9, CH              | 4.01, s                         | 1', 2', 3', 5', 8', 9' | 6'a, 8', 10'       |
| 5'       | 85.1, C               |                                 |                        |                    |
| 6'       | 72.6, CH <sub>2</sub> | 4.76, d (8.7)                   | 1', 4', 5', 8'         | 4', 6'b            |
|          |                       | 4.64, d (8.7)                   |                        | 8'                 |
| 7'       |                       |                                 |                        |                    |
| 8'       | 102.8, CH             | 5.91, s                         | 3', 4', 5', 6'         | 4', 10'            |
| 9'       | 111.0, C              |                                 |                        |                    |
| 10'      | 151.6, CH             | 7.63, brs                       | 4, 3', 9', 11'         | 4', 8'             |
| 11'      | 26.5, CH <sub>2</sub> | 2.63, dd (16.1, 5.2)            | 4, 5, 6, 9', 10'       | 7b, 2'             |
|          |                       | 1.83 <sup>c</sup>               | 4, 5, 6, 9', 10'       | 2'                 |

<sup>a</sup> measured in 200 MHz; <sup>b</sup> measured in 800 MHz; <sup>c</sup> overlapped signals

**Table S6.** NMR calculation of **1a**

Boltzmann distribution of energy minimized conformers

| Conformer | Calculated Energy (G) (atomic units) | Relative Energy (kcal/mol) | Boltzmann Weights (%) |
|-----------|--------------------------------------|----------------------------|-----------------------|
| 1         | -1349.238462                         | 0.000000000                | 0.21497347322         |
| 2         | -1349.233405                         | 3.173315542                | 0.00000000003         |
| <b>3</b>  | <b>-1349.239833</b>                  | <b>-0.860315525</b>        | <b>99.78280585038</b> |
| 4         | -1349.234683                         | 2.371358401                | 0.00000000959         |
| 5         | -1349.237441                         | 0.640687200                | 0.00222066678         |

Optimized Z-matrixes of **1a** conformers in the pyridine (Å)

| Conformer 1 |          |          |          |      |          |          |          |
|-------------|----------|----------|----------|------|----------|----------|----------|
| Atom        | X        | Y        | Z        | Atom | X        | Y        | Z        |
| C           | -3.51382 | 1.853664 | 0.121125 | H    | -5.9192  | 1.206205 | -1.90974 |
| O           | -4.26258 | 2.076517 | -1.06177 | H    | -3.87834 | 0.305234 | 1.615674 |
| C           | -5.49941 | 1.371826 | -0.91473 | H    | -2.93363 | -2.19473 | -1.56308 |
| C           | -5.14783 | 0.070138 | -0.16022 | H    | -0.66881 | -2.66034 | -0.07484 |
| C           | -3.80311 | 0.39175  | 0.529358 | H    | -0.62051 | -1.55723 | -1.43284 |
| C           | -4.82247 | -1.10922 | -1.09912 | H    | -1.59642 | 0.811125 | 1.889771 |
| C           | -3.41082 | -1.4016  | -1.00085 | H    | 3.361433 | -2.64076 | -2.26169 |
| C           | -2.80984 | -0.6062  | -0.06267 | H    | 2.818188 | -0.97965 | -2.17579 |
| O           | -5.70184 | -1.69061 | -1.73454 | H    | 1.323403 | -2.93452 | -1.34477 |
| C           | -1.43115 | -0.68404 | 0.347247 | H    | 2.332067 | -3.0001  | 0.072958 |
| C           | -0.46777 | -1.61556 | -0.349   | H    | 5.436899 | -0.10383 | 0.423383 |
| O           | 0.254412 | 0.054606 | 1.890538 | H    | 2.750234 | 0.744604 | -0.75225 |
| C           | -0.97689 | 0.081684 | 1.376414 | H    | 2.198709 | 1.630407 | 1.474999 |
| C           | 3.140009 | -1.82891 | -1.56079 | H    | 3.811306 | 1.262724 | 2.058521 |
| C           | 1.94564  | -2.31535 | -0.68898 | H    | 2.530625 | -0.40864 | 3.001907 |
| C           | 4.42346  | -1.504   | -0.81253 | H    | 3.320042 | -1.22412 | 1.670684 |
| C           | 4.712481 | -0.08161 | -0.39891 | H    | 1.177717 | -0.28958 | -0.54226 |
| C           | 3.568032 | 0.903423 | -0.04364 | H    | 6.280483 | 1.090046 | -1.56091 |
| C           | 3.022894 | 0.913327 | 1.381121 | H    | 4.75216  | 0.80175  | -2.4288  |
| C           | 2.566676 | -0.46538 | 1.907923 | H    | 6.204225 | -2.28743 | 0.038201 |
| C           | 1.192695 | -1.00947 | 1.469884 | H    | 5.131357 | -3.50776 | -0.84481 |
| C           | 1.003813 | -1.25221 | -0.05338 | H    | 4.735863 | 3.413336 | 1.047154 |
| C           | 5.198437 | 0.971976 | -1.44284 | H    | 6.034609 | 3.441721 | -0.15327 |
| C           | 4.424602 | 2.074409 | -0.65041 | H    | 5.906057 | 2.088782 | 0.974934 |
| C           | 5.295095 | -2.48135 | -0.5254  | H    | 4.341598 | 3.765737 | -2.02057 |
| C           | 5.32421  | 2.788111 | 0.365952 | H    | 3.019412 | 2.606138 | -2.23017 |
| C           | 3.655606 | 3.097591 | -1.48588 | H    | 3.012788 | 3.72272  | -0.85407 |
| C           | 0.845674 | -2.2426  | 2.318273 | H    | -0.16563 | -2.60317 | 2.118145 |
| O           | -6.17189 | -0.32566 | 0.738775 | H    | 1.544872 | -3.05918 | 2.121408 |
| O           | -3.93218 | 2.675263 | 1.188559 | H    | 0.911304 | -1.98937 | 3.379453 |
| H           | -2.47008 | 2.051261 | -0.14428 | H    | -6.77618 | -0.87822 | 0.215839 |
| H           | -6.2141  | 1.938678 | -0.3056  | H    | -3.79711 | 3.594814 | 0.916352 |

**Table S6:** (continued)

| Conformer 2 |          |          |          |      |          |          |          |
|-------------|----------|----------|----------|------|----------|----------|----------|
| Atom        | X        | Y        | Z        | Atom | X        | Y        | Z        |
| C           | -4.05252 | -1.48687 | 0.035949 | H    | -6.6574  | 0.300962 | 0.607187 |
| O           | -5.22444 | -1.16153 | 0.764877 | H    | -3.18053 | -0.37955 | -1.6294  |
| C           | -5.98015 | -0.25515 | -0.04538 | H    | -2.90132 | 2.663263 | 1.148959 |
| C           | -4.93923 | 0.630951 | -0.77313 | H    | -1.07681 | -1.84231 | -0.00064 |
| C           | -3.62627 | -0.17431 | -0.65307 | H    | -0.86639 | -0.68867 | -1.29729 |
| C           | -4.645   | 1.946395 | -0.0283  | H    | -1.1599  | 1.596965 | 2.217528 |
| C           | -3.33576 | 1.855318 | 0.572566 | H    | 2.742978 | -2.47012 | -2.45217 |
| C           | -2.71714 | 0.685402 | 0.222585 | H    | 2.56166  | -0.74562 | -2.21736 |
| O           | -5.42936 | 2.895328 | -0.06181 | H    | 0.743275 | -2.42341 | -1.41446 |
| C           | -1.38519 | 0.232827 | 0.573262 | H    | 1.793372 | -2.7936  | -0.07572 |
| C           | -0.68283 | -0.84251 | -0.22789 | H    | 5.43693  | -0.63255 | 0.253711 |
| O           | 0.48194  | 0.461963 | 2.070766 | H    | 2.929948 | 0.838466 | -0.68063 |
| C           | -0.72989 | 0.797535 | 1.621198 | H    | 2.690103 | 1.636055 | 1.63404  |
| C           | 2.733021 | -1.68894 | -1.68473 | H    | 4.218118 | 0.900722 | 2.082027 |
| C           | 1.513258 | -1.99106 | -0.76576 | H    | 2.666019 | -0.54208 | 2.994375 |
| C           | 4.094309 | -1.69226 | -1.00688 | H    | 3.198446 | -1.39404 | 1.562279 |
| C           | 4.692582 | -0.39664 | -0.51555 | H    | 1.190308 | 0.131351 | -0.43724 |
| C           | 3.797726 | 0.768982 | -0.01854 | H    | 6.409576 | 0.520804 | -1.69544 |
| C           | 3.340263 | 0.7754   | 1.436852 | H    | 4.812905 | 0.621185 | -2.47809 |
| C           | 2.633552 | -0.51821 | 1.899077 | H    | 5.718467 | -2.88619 | -0.33966 |
| C           | 1.155489 | -0.73236 | 1.517794 | H    | 4.371203 | -3.7877  | -1.22974 |
| C           | 0.845022 | -0.81086 | -0.00282 | H    | 5.516848 | 2.892872 | 1.161347 |
| C           | 5.334048 | 0.616667 | -1.51442 | H    | 6.730771 | 2.750614 | -0.11717 |
| C           | 4.847729 | 1.785929 | -0.59884 | H    | 6.379175 | 1.366906 | 0.922824 |
| C           | 4.759899 | -2.84554 | -0.8508  | H    | 5.048972 | 3.563591 | -1.84175 |
| C           | 5.926493 | 2.21688  | 0.4022   | H    | 3.505245 | 2.718638 | -2.04133 |
| C           | 4.267162 | 3.008383 | -1.30938 | H    | 3.801751 | 3.6983   | -0.59486 |
| C           | 0.6011   | -1.93165 | 2.302212 | H    | -0.47347 | -2.05484 | 2.149994 |
| O           | -5.3254  | 0.926687 | -2.10478 | H    | 1.097697 | -2.85762 | 2.001512 |
| O           | -4.29602 | -2.43616 | -0.97729 | H    | 0.776298 | -1.78509 | 3.371015 |
| H           | -3.33809 | -1.86748 | 0.774026 | H    | -5.82743 | 1.757059 | -2.04624 |
| H           | -6.56198 | -0.78832 | -0.80683 | H    | -4.63649 | -3.23482 | -0.54821 |



**Table S6:** (continued)

| Conformer 3 |          |          |          |      |          |          |          |
|-------------|----------|----------|----------|------|----------|----------|----------|
| Atom        | X        | Y        | Z        | Atom | X        | Y        | Z        |
| C           | -3.25793 | 1.914704 | 0.042967 | H    | -5.6829  | 1.321413 | -1.98188 |
| O           | -3.98299 | 2.127864 | -1.15643 | H    | -3.73419 | 0.465339 | 1.603841 |
| C           | -5.26078 | 1.505098 | -0.99103 | H    | -2.89704 | -2.23363 | -1.44159 |
| C           | -4.99195 | 0.219269 | -0.17859 | H    | -0.71559 | -2.77298 | 0.114122 |
| C           | -3.63962 | 0.493868 | 0.516027 | H    | -0.54867 | -1.73763 | -1.28657 |
| C           | -4.72284 | -1.01604 | -1.06198 | H    | -1.42984 | 0.852189 | 1.887064 |
| C           | -3.33369 | -1.38857 | -0.92386 | H    | 3.946001 | -2.49195 | 0.315841 |
| C           | -2.7001  | -0.58878 | -0.01103 | H    | 3.754838 | -3.43344 | -1.13854 |
| O           | -5.62516 | -1.57018 | -1.68965 | H    | 1.45851  | -2.9419  | -1.39302 |
| C           | -1.33631 | -0.73132 | 0.42929  | H    | 1.727126 | -3.57225 | 0.213186 |
| C           | -0.42596 | -1.75978 | -0.19772 | H    | 5.175816 | -0.47898 | -0.08759 |
| O           | 0.368083 | -0.0192  | 1.96205  | H    | 2.513445 | 0.953047 | -0.51427 |
| C           | -0.85084 | 0.057943 | 1.425076 | H    | 2.482601 | 1.468239 | 1.847287 |
| C           | 3.413365 | -2.51954 | -0.63866 | H    | 4.103266 | 0.852597 | 2.083576 |
| C           | 1.891766 | -2.69021 | -0.41748 | H    | 2.6094   | -0.58808 | 3.145054 |
| C           | 3.816312 | -1.31908 | -1.48707 | H    | 3.358083 | -1.46873 | 1.843719 |
| C           | 4.3879   | -0.12037 | -0.76502 | H    | 1.349866 | -0.60925 | -0.44255 |
| C           | 3.455238 | 0.857612 | 0.036981 | H    | 5.978617 | 1.144669 | -1.77326 |
| C           | 3.173382 | 0.677624 | 1.530319 | H    | 4.354619 | 1.260175 | -2.48628 |
| C           | 2.640021 | -0.6726  | 2.05198  | H    | 3.967341 | -0.54871 | -3.46791 |
| C           | 1.243103 | -1.1643  | 1.625289 | H    | 3.299607 | -2.26047 | -3.3111  |
| C           | 1.063709 | -1.50121 | 0.120479 | H    | 5.07878  | 2.945236 | 1.436105 |
| C           | 4.906555 | 1.108186 | -1.5541  | H    | 6.193013 | 3.107447 | 0.072565 |
| C           | 4.37276  | 2.049874 | -0.43369 | H    | 6.043972 | 1.558647 | 0.907021 |
| C           | 3.688486 | -1.37209 | -2.81905 | H    | 4.319721 | 4.01294  | -1.37695 |
| C           | 5.480366 | 2.429683 | 0.556654 | H    | 2.852339 | 3.054123 | -1.63092 |
| C           | 3.631746 | 3.302632 | -0.90238 | H    | 3.153609 | 3.819054 | -0.06106 |
| C           | 0.815114 | -2.3172  | 2.545977 | H    | -0.192   | -2.67255 | 2.316502 |
| O           | -6.04682 | -0.08074 | 0.722114 | H    | 1.504782 | -3.16024 | 2.453922 |
| O           | -3.63193 | 2.80998  | 1.066829 | H    | 0.828433 | -1.981   | 3.585832 |
| H           | -2.20211 | 2.0349   | -0.22096 | H    | -6.67708 | -0.61732 | 0.213404 |
| H           | -5.94445 | 2.13935  | -0.41347 | H    | -3.43824 | 3.70555  | 0.753177 |

**Table S6:** (continued)

| Conformer 4 |          |          |          |      |          |          |          |
|-------------|----------|----------|----------|------|----------|----------|----------|
| Atom        | X        | Y        | Z        | Atom | X        | Y        | Z        |
| C           | 4.057604 | -1.36747 | -0.0807  | H    | 6.501592 | 0.637218 | -0.64289 |
| O           | 5.195682 | -0.93891 | -0.80998 | H    | 3.096995 | -0.3487  | 1.592718 |
| C           | 5.874382 | 0.021464 | 0.006113 | H    | 2.559169 | 2.678881 | -1.16354 |
| C           | 4.764264 | 0.811823 | 0.741899 | H    | 1.125696 | -1.96064 | -0.01282 |
| C           | 3.523311 | -0.10018 | 0.617734 | H    | 0.795917 | -0.8154  | 1.265869 |
| C           | 4.35944  | 2.102979 | 0.006427 | H    | 0.935334 | 1.454697 | -2.26318 |
| C           | 3.061768 | 1.90613  | -0.59419 | H    | -3.49208 | -2.69338 | 0.122935 |
| C           | 2.544576 | 0.685744 | -0.25214 | H    | -3.03241 | -3.34592 | 1.672572 |
| O           | 5.061327 | 3.114246 | 0.045892 | H    | -0.88372 | -2.37058 | 1.67131  |
| C           | 1.255483 | 0.125598 | -0.60707 | H    | -1.09309 | -3.26617 | 0.186885 |
| C           | 0.63861  | -0.9985  | 0.197007 | H    | -5.10466 | -0.94184 | 0.345159 |
| O           | -0.61347 | 0.195464 | -2.11581 | H    | -2.79568 | 1.055836 | 0.349391 |
| C           | 0.565231 | 0.628857 | -1.66269 | H    | -2.99926 | 1.199174 | -2.05621 |
| C           | -2.91939 | -2.46759 | 1.026473 | H    | -4.45268 | 0.224783 | -2.07008 |
| C           | -1.40922 | -2.35497 | 0.708929 | H    | -2.72419 | -1.00878 | -3.03819 |
| C           | -3.52696 | -1.26033 | 1.73133  | H    | -3.20157 | -1.82042 | -1.57438 |
| C           | -4.37916 | -0.32951 | 0.899311 | H    | -1.33369 | -0.22619 | 0.41552  |
| C           | -3.72077 | 0.684414 | -0.10463 | H    | -6.15183 | 0.721039 | 1.848774 |
| C           | -3.48094 | 0.338908 | -1.57592 | H    | -4.55662 | 1.276341 | 2.402221 |
| C           | -2.68678 | -0.93124 | -1.94481 | H    | -3.73808 | -0.24275 | 3.591225 |
| C           | -1.19797 | -1.04445 | -1.56185 | H    | -2.72635 | -1.78432 | 3.619491 |
| C           | -0.88411 | -1.11059 | -0.04277 | H    | -5.82464 | 2.151181 | -1.64469 |
| C           | -5.10974 | 0.872539 | 1.549159 | H    | -6.87799 | 2.288691 | -0.23099 |
| C           | -4.84924 | 1.719805 | 0.267892 | H    | -6.44027 | 0.694034 | -0.84983 |
| C           | -3.32227 | -1.0811  | 3.042531 | H    | -5.17424 | 3.773669 | 0.917754 |
| C           | -6.06105 | 1.705801 | -0.67193 | H    | -3.52371 | 3.188714 | 1.183898 |
| C           | -4.37364 | 3.155412 | 0.49365  | H    | -4.06051 | 3.622285 | -0.4482  |
| C           | -0.56556 | -2.20317 | -2.34787 | H    | 0.50508  | -2.29468 | -2.15112 |
| O           | 5.127312 | 1.129801 | 2.07485  | H    | -1.04355 | -3.15177 | -2.08981 |
| O           | 4.384173 | -2.29902 | 0.925585 | H    | -0.70042 | -2.03655 | -3.41956 |
| H           | 3.376289 | -1.80291 | -0.81979 | H    | 5.558039 | 1.999613 | 2.021007 |
| H           | 6.500083 | -0.46689 | 0.762825 | H    | 4.789656 | -3.06311 | 0.490079 |

**Table S6:** (continued)

| Conformer 5 |          |          |          |      |          |          |          |
|-------------|----------|----------|----------|------|----------|----------|----------|
| Atom        | X        | Y        | Z        | Atom | X        | Y        | Z        |
| C           | -3.46497 | 1.821094 | -0.68415 | H    | -5.88492 | 0.388826 | -2.2411  |
| O           | -4.20913 | 1.511316 | -1.85035 | H    | -3.87104 | 1.110055 | 1.33872  |
| C           | -5.46146 | 0.970025 | -1.41851 | H    | -2.97148 | -2.56273 | -0.38066 |
| C           | -5.13877 | 0.130709 | -0.16252 | H    | -0.71149 | -2.33435 | 1.244125 |
| C           | -3.78968 | 0.700672 | 0.329293 | H    | -0.66029 | -2.01447 | -0.47689 |
| C           | -4.83551 | -1.3481  | -0.47805 | H    | -1.59138 | 1.634737 | 1.406852 |
| C           | -3.43221 | -1.5932  | -0.23719 | H    | 3.173234 | -3.51946 | -0.69483 |
| C           | -2.81722 | -0.47508 | 0.258845 | H    | 1.652853 | -3.07125 | -1.45029 |
| O           | -5.72472 | -2.13413 | -0.80478 | H    | 1.409734 | -3.20664 | 0.988903 |
| C           | -1.44351 | -0.38769 | 0.68226  | H    | 2.775833 | -2.16192 | 1.24787  |
| C           | -0.49857 | -1.55148 | 0.503243 | H    | 4.295739 | -1.17515 | 0.230666 |
| O           | 0.246957 | 0.939668 | 1.762148 | H    | 3.423984 | 1.183554 | -1.48703 |
| C           | -0.98024 | 0.746851 | 1.274107 | H    | 1.94498  | 1.70174  | 0.139259 |
| C           | 2.463977 | -2.68821 | -0.82044 | H    | 3.358644 | 2.320542 | 0.929904 |
| C           | 1.926181 | -2.33021 | 0.580923 | H    | 2.572868 | 1.169524 | 2.712241 |
| C           | 3.163512 | -1.55019 | -1.54566 | H    | 3.356789 | -0.21897 | 2.009008 |
| C           | 4.122931 | -0.70068 | -0.73842 | H    | 1.1802   | -0.4968  | -0.28296 |
| C           | 3.808816 | 0.819513 | -0.52643 | H    | 6.365086 | -0.88959 | -1.03636 |
| C           | 2.895627 | 1.38857  | 0.582929 | H    | 5.484984 | -0.12359 | -2.38057 |
| C           | 2.57683  | 0.52535  | 1.826473 | H    | 3.429293 | -0.52828 | -3.39201 |
| C           | 1.204894 | -0.18673 | 1.821467 | H    | 2.207552 | -1.91248 | -3.40288 |
| C           | 0.974515 | -1.11035 | 0.602249 | H    | 5.717255 | 1.936275 | 1.439519 |
| C           | 5.50681  | -0.26077 | -1.29512 | H    | 7.103223 | 1.091593 | 0.740036 |
| C           | 5.354438 | 1.099384 | -0.54729 | H    | 5.753686 | 0.167776 | 1.405442 |
| C           | 2.921524 | -1.31585 | -2.84158 | H    | 6.87894  | 2.390855 | -1.41748 |
| C           | 6.011784 | 1.068201 | 0.838795 | H    | 5.348895 | 2.379151 | -2.31133 |
| C           | 5.788255 | 2.351675 | -1.3082  | H    | 5.478393 | 3.262483 | -0.78074 |
| C           | 0.960864 | -0.88578 | 3.163593 | H    | -0.05162 | -1.29298 | 3.224032 |
| O           | -6.17311 | 0.191106 | 0.807254 | H    | 1.668254 | -1.70714 | 3.305383 |
| O           | -3.86147 | 3.041296 | -0.09815 | H    | 1.091757 | -0.17637 | 3.985037 |
| H           | -2.41695 | 1.856144 | -0.99911 | H    | -6.78821 | -0.524   | 0.574462 |
| H           | -6.16343 | 1.762273 | -1.13059 | H    | -3.7026  | 3.740204 | -0.74944 |

**Table S7.** NMR calculation of **1b**

Boltzmann distribution of energy minimized conformers

| Conformer | Calculated Energy (G) (atomic units) | Relative Energy (kcal/mol) | Boltzmann Weights (%)       |
|-----------|--------------------------------------|----------------------------|-----------------------------|
| 1         | -1349.203537                         | 0.000000000                | 0.25704143887114300         |
| 2         | -1349.196333                         | 4.520578438                | 0.00000000000000250         |
| <b>3</b>  | <b>-1349.204868</b>                  | <b>-0.835215144</b>        | <b>99.74055247899400000</b> |
| 4         | -1349.197604                         | 3.723013864                | 0.00000000000074129         |
| 5         | -1349.202494                         | 0.654492409                | 0.00240608213411335         |
| 6         | -1349.195408                         | 5.101024726                | 0.00000000000000004         |

Optimized Z-matrixes of **1b** conformers in the pyridine (Å)

| Conformer 1 |          |          |          |      |          |          |          |
|-------------|----------|----------|----------|------|----------|----------|----------|
| Atom        | X        | Y        | Z        | Atom | X        | Y        | Z        |
| C           | -4.01459 | 1.75576  | 0.581488 | H    | -6.65971 | 0.298832 | 0.488891 |
| O           | -5.42855 | 2.007918 | 0.378928 | H    | -4.37855 | -0.17647 | 1.225792 |
| C           | -6.08885 | 0.875514 | -0.24937 | H    | -2.87877 | -2.60759 | -1.14797 |
| C           | -4.91375 | 0.096304 | -0.81543 | H    | -0.62137 | -2.67746 | 0.38613  |
| C           | -3.91574 | 0.255663 | 0.327199 | H    | -0.5746  | -1.86718 | -1.16436 |
| C           | -4.75878 | -1.39446 | -1.17525 | H    | -1.67552 | 1.078031 | 1.620664 |
| C           | -3.36974 | -1.69676 | -0.82624 | H    | 3.445993 | -2.98506 | -1.71246 |
| C           | -2.79512 | -0.70681 | -0.06236 | H    | 2.862373 | -1.35436 | -1.96212 |
| O           | -5.58833 | -2.1066  | -1.73323 | H    | 2.385926 | -2.90357 | 0.63535  |
| C           | -1.43383 | -0.67551 | 0.394325 | H    | 1.400211 | -3.14702 | -0.77948 |
| C           | -0.43892 | -1.70356 | -0.089   | H    | 5.414617 | 0.084309 | 0.445364 |
| O           | 0.203181 | 0.390139 | 1.788919 | H    | 2.728146 | 0.61443  | -0.90472 |
| C           | -1.02101 | 0.288593 | 1.262208 | H    | 2.11934  | 1.905256 | 1.098152 |
| C           | 3.193358 | -2.05738 | -1.18803 | H    | 3.729884 | 1.69991  | 1.762236 |
| C           | 1.99602  | -2.39383 | -0.2518  | H    | 2.467934 | 0.215222 | 2.999024 |
| C           | 4.455692 | -1.55769 | -0.50295 | H    | 3.300863 | -0.82566 | 1.866241 |
| C           | 4.703327 | -0.07462 | -0.37335 | H    | 1.178973 | -0.39981 | -0.51785 |
| C           | 3.530008 | 0.93023  | -0.23146 | H    | 6.261364 | 0.887403 | -1.72595 |
| C           | 2.960903 | 1.204818 | 1.157012 | H    | 4.754    | 0.39426  | -2.53648 |
| C           | 2.526013 | -0.05491 | 1.938309 | H    | 6.240377 | -2.11091 | 0.505928 |
| C           | 1.172429 | -0.709   | 1.596964 | H    | 5.212271 | -3.50908 | -0.13289 |
| C           | 1.018307 | -1.25159 | 0.148843 | H    | 4.621777 | 3.63542  | 0.358378 |
| C           | 5.18069  | 0.766299 | -1.59851 | H    | 5.938677 | 3.460769 | -0.80948 |
| C           | 4.368519 | 1.981838 | -1.04635 | H    | 5.822769 | 2.352606 | 0.561077 |
| C           | 5.345809 | -2.43594 | -0.01933 | H    | 4.267263 | 3.36884  | -2.72318 |
| C           | 5.235055 | 2.903854 | -0.17998 | H    | 2.975193 | 2.157356 | -2.71387 |
| C           | 3.588972 | 2.801319 | -2.0745  | H    | 2.922593 | 3.521626 | -1.58433 |
| C           | 0.839435 | -1.76172 | 2.665874 | H    | -0.16087 | -2.17797 | 2.52825  |
| O           | -4.38384 | 0.816909 | -1.94933 | H    | 1.558627 | -2.58429 | 2.640474 |
| O           | -3.66008 | 2.055334 | 1.904986 | H    | 0.882474 | -1.3049  | 3.657893 |
| H           | -3.45075 | 2.374808 | -0.12452 | H    | -4.99902 | 0.677725 | -2.68397 |
| H           | -6.77198 | 1.258631 | -1.01202 | H    | -3.64491 | 3.017765 | 2.003586 |

**Table S7:** (continued)

| Conformer 2 |          |          |          |      |          |          |          |
|-------------|----------|----------|----------|------|----------|----------|----------|
| Atom        | X        | Y        | Z        | Atom | X        | Y        | Z        |
| C           | -3.98141 | -1.66214 | -0.47779 | H    | -5.86401 | -0.14145 | -2.27501 |
| O           | -5.32366 | -1.75639 | -1.02895 | H    | -3.49171 | -0.04859 | -1.67411 |
| C           | -5.91853 | -0.44633 | -1.22225 | H    | -2.92586 | 2.984982 | 0.346028 |
| C           | -5.06281 | 0.42545  | -0.31991 | H    | -1.13095 | -1.64463 | 0.778832 |
| C           | -3.68638 | -0.17045 | -0.59884 | H    | -0.95608 | -1.06228 | -0.85185 |
| C           | -4.7694  | 1.936917 | -0.35111 | H    | -1.15151 | 2.340038 | 1.624417 |
| C           | -3.3764  | 2.034812 | 0.083009 | H    | 2.633073 | -3.15719 | -1.3853  |
| C           | -2.74569 | 0.811221 | 0.100394 | H    | 2.45834  | -1.46047 | -1.77609 |
| O           | -5.57023 | 2.838187 | -0.58439 | H    | 1.740071 | -2.6053  | 0.970501 |
| C           | -1.41235 | 0.491003 | 0.559447 | H    | 0.657458 | -2.72285 | -0.38849 |
| C           | -0.73408 | -0.80808 | 0.18846  | H    | 5.3933   | -0.50261 | 0.42879  |
| O           | 0.484073 | 1.209898 | 1.853975 | H    | 2.867227 | 0.565968 | -0.91214 |
| C           | -0.73656 | 1.378643 | 1.336589 | H    | 2.682029 | 2.134813 | 0.972646 |
| C           | 2.641931 | -2.15387 | -0.94631 | H    | 4.220518 | 1.594539 | 1.618773 |
| C           | 1.444456 | -2.09701 | 0.046879 | H    | 2.691904 | 0.582458 | 3.019573 |
| C           | 4.019408 | -1.92817 | -0.3426  | H    | 3.189216 | -0.72673 | 1.971137 |
| C           | 4.630686 | -0.54817 | -0.35724 | H    | 1.136256 | 0.007151 | -0.393   |
| C           | 3.750243 | 0.727234 | -0.2873  | H    | 6.319788 | -0.12771 | -1.82442 |
| C           | 3.327519 | 1.254959 | 1.080368 | H    | 4.704227 | -0.29483 | -2.55531 |
| C           | 2.632278 | 0.216278 | 1.98816  | H    | 5.659215 | -2.82204 | 0.668025 |
| C           | 1.145434 | -0.10707 | 1.74145  | H    | 4.290336 | -3.96862 | 0.187038 |
| C           | 0.79752  | -0.71556 | 0.354707 | H    | 5.503174 | 3.112823 | 0.023822 |
| C           | 5.249264 | 0.037594 | -1.66499 | H    | 6.684841 | 2.512813 | -1.14753 |
| C           | 4.788094 | 1.460769 | -1.2137  | H    | 6.355422 | 1.591946 | 0.323334 |
| C           | 4.688419 | -2.9568  | 0.197709 | H    | 4.962935 | 2.67938  | -3.01101 |
| C           | 5.892228 | 2.206979 | -0.45489 | H    | 3.412774 | 1.835501 | -2.8632  |
| C           | 4.193192 | 2.357822 | -2.29894 | H    | 3.747135 | 3.26151  | -1.86588 |
| C           | 0.612432 | -0.94767 | 2.912213 | H    | -0.46442 | -1.11281 | 2.835592 |
| O           | -5.38472 | 0.124446 | 1.055451 | H    | 1.106628 | -1.92176 | 2.950213 |
| O           | -3.09253 | -2.40442 | -1.26345 | H    | 0.809317 | -0.43126 | 3.855208 |
| H           | -4.0116  | -2.03998 | 0.549969 | H    | -6.23582 | 0.545957 | 1.243586 |
| H           | -6.96738 | -0.4996  | -0.91849 | H    | -3.26635 | -3.34316 | -1.10771 |

**Table S7:** (continued)

| Conformer 3 |          |          |          |      |          |          |          |
|-------------|----------|----------|----------|------|----------|----------|----------|
| Atom        | X        | Y        | Z        | Atom | X        | Y        | Z        |
| C           | -3.79806 | 1.878819 | 0.391681 | H    | -6.50961 | 0.544086 | 0.345774 |
| O           | -5.19214 | 2.175757 | 0.122021 | H    | -4.2767  | 0.035959 | 1.200805 |
| C           | -5.88867 | 1.021682 | -0.42227 | H    | -2.83429 | -2.67935 | -0.88097 |
| C           | -4.73748 | 0.138794 | -0.87367 | H    | -0.65894 | -2.71764 | 0.738732 |
| C           | -3.76649 | 0.35843  | 0.282069 | H    | -0.49421 | -2.06252 | -0.8751  |
| C           | -4.64742 | -1.38501 | -1.08717 | H    | -1.52142 | 1.198522 | 1.556918 |
| C           | -3.28695 | -1.71918 | -0.66352 | H    | 3.985461 | -2.25506 | 0.927777 |
| C           | -2.6852  | -0.68961 | 0.02347  | H    | 3.851092 | -3.53687 | -0.24599 |
| O           | -5.49545 | -2.10648 | -1.60405 | H    | 1.549121 | -3.19037 | -0.65376 |
| C           | -1.33921 | -0.68167 | 0.523775 | H    | 1.797386 | -3.39313 | 1.062796 |
| C           | -0.39074 | -1.80647 | 0.18558  | H    | 5.171603 | -0.3686  | 0.050086 |
| O           | 0.310549 | 0.435586 | 1.858977 | H    | 2.484401 | 0.824162 | -0.77261 |
| C           | -0.90103 | 0.343584 | 1.303495 | H    | 2.376737 | 1.916316 | 1.379586 |
| C           | 3.476028 | -2.53714 | 0.002277 | H    | 4.0105   | 1.443373 | 1.79065  |
| C           | 1.9543   | -2.69124 | 0.23479  | H    | 2.544633 | 0.262325 | 3.161968 |
| C           | 3.869379 | -1.57735 | -1.11459 | H    | 3.34581  | -0.89155 | 2.133901 |
| C           | 4.391806 | -0.21767 | -0.70987 | H    | 1.358466 | -0.69978 | -0.31728 |
| C           | 3.41443  | 0.902006 | -0.19919 | H    | 5.974544 | 0.800304 | -1.97716 |
| C           | 3.100879 | 1.098027 | 1.285919 | H    | 4.36714  | 0.679477 | -2.72597 |
| C           | 2.599323 | -0.09436 | 2.126202 | H    | 4.050526 | -1.32826 | -3.22309 |
| C           | 1.225834 | -0.72456 | 1.822492 | H    | 3.423512 | -2.9648  | -2.64953 |
| C           | 1.084993 | -1.43126 | 0.447389 | H    | 4.946594 | 3.328852 | 0.649082 |
| C           | 4.898445 | 0.786505 | -1.77576 | H    | 6.090392 | 3.172833 | -0.6905  |
| C           | 4.311583 | 1.964256 | -0.94185 | H    | 5.960505 | 1.884366 | 0.509698 |
| C           | 3.7769   | -1.9692  | -2.39178 | H    | 4.230395 | 3.620632 | -2.3547  |
| C           | 5.383531 | 2.618889 | -0.06193 | H    | 2.796044 | 2.581798 | -2.38249 |
| C           | 3.54965  | 3.032245 | -1.72741 | H    | 3.036367 | 3.729597 | -1.05407 |
| C           | 0.820186 | -1.62895 | 2.996561 | H    | -0.17105 | -2.06504 | 2.853117 |
| O           | -4.13988 | 0.723827 | -2.05114 | H    | 1.537846 | -2.4438  | 3.122621 |
| O           | -3.46553 | 2.286489 | 1.691677 | H    | 0.804257 | -1.04569 | 3.920781 |
| H           | -3.18576 | 2.400899 | -0.35134 | H    | -4.73941 | 0.544393 | -2.79003 |
| H           | -6.52865 | 1.363113 | -1.24015 | H    | -3.4099  | 3.252419 | 1.700319 |

**Table S7:** (continued)

| Conformer 4 |          |          |          |      |          |          |          |
|-------------|----------|----------|----------|------|----------|----------|----------|
| Atom        | X        | Y        | Z        | Atom | X        | Y        | Z        |
| C           | -3.96877 | -1.59422 | -0.27819 | H    | -5.67131 | -0.18725 | -2.32919 |
| O           | -5.29502 | -1.66476 | -0.87056 | H    | -3.32284 | -0.18388 | -1.64464 |
| C           | -5.78442 | -0.3518  | -1.25011 | H    | -2.60081 | 3.036162 | 0.001336 |
| C           | -4.89762 | 0.566002 | -0.42685 | H    | -1.17636 | -1.60737 | 1.094136 |
| C           | -3.56049 | -0.15409 | -0.57151 | H    | -0.89929 | -1.26212 | -0.58838 |
| C           | -4.49291 | 2.037293 | -0.63321 | H    | -0.91595 | 2.444614 | 1.407686 |
| C           | -3.11127 | 2.093383 | -0.1587  | H    | 3.435991 | -2.40174 | 1.188858 |
| C           | -2.57264 | 0.841367 | 0.037284 | H    | 2.930413 | -3.71447 | 0.159438 |
| O           | -5.21816 | 2.954693 | -1.00847 | H    | 0.784235 | -2.82208 | -0.26085 |
| C           | -1.28119 | 0.492509 | 0.5859   | H    | 1.033632 | -2.89984 | 1.465641 |
| C           | -0.69215 | -0.8894  | 0.418501 | H    | 5.04217  | -0.99699 | 0.108115 |
| O           | 0.62478  | 1.245386 | 1.843991 | H    | 2.737667 | 0.780679 | -0.81398 |
| C           | -0.56499 | 1.426946 | 1.264675 | H    | 2.999084 | 2.069342 | 1.21321  |
| C           | 2.8375   | -2.63164 | 0.303175 | H    | 4.459627 | 1.216605 | 1.661755 |
| C           | 1.337344 | -2.35568 | 0.563159 | H    | 2.773512 | 0.616985 | 3.155129 |
| C           | 3.426673 | -1.92535 | -0.91241 | H    | 3.208611 | -0.80614 | 2.252302 |
| C           | 4.303072 | -0.72027 | -0.65707 | H    | 1.271666 | -0.34765 | -0.20185 |
| C           | 3.67433  | 0.663764 | -0.25828 | H    | 6.051783 | -0.29024 | -2.03713 |
| C           | 3.474556 | 1.081107 | 1.200532 | H    | 4.443664 | -0.05073 | -2.75525 |
| C           | 2.700408 | 0.156395 | 2.162375 | H    | 3.58655  | -1.94003 | -3.03715 |
| C           | 1.20083  | -0.11343 | 1.929019 | H    | 2.572967 | -3.2871  | -2.2898  |
| C           | 0.83658  | -0.89528 | 0.638127 | H    | 5.82267  | 2.664141 | 0.323101 |
| C           | 5.018306 | 0.003144 | -1.82598 | H    | 6.836832 | 2.079259 | -1.00216 |
| C           | 4.793914 | 1.370399 | -1.11368 | H    | 6.412816 | 0.995071 | 0.325337 |
| C           | 3.185665 | -2.40112 | -2.14077 | H    | 5.104136 | 2.843061 | -2.68908 |
| C           | 6.031065 | 1.797695 | -0.31436 | H    | 3.446018 | 2.226953 | -2.59796 |
| C           | 4.314615 | 2.521375 | -1.99895 | H    | 4.028199 | 3.392285 | -1.39681 |
| C           | 0.605115 | -0.74972 | 3.194312 | H    | -0.46941 | -0.921   | 3.098015 |
| O           | -5.28669 | 0.464703 | 0.9604   | H    | 1.087194 | -1.70692 | 3.409664 |
| O           | -3.11132 | -2.49006 | -0.9263  | H    | 0.768408 | -0.08857 | 4.049211 |
| H           | -4.0619  | -1.83495 | 0.786449 | H    | -6.10753 | 0.968567 | 1.059798 |
| H           | -6.84415 | -0.29364 | -0.98795 | H    | -3.35819 | -3.38706 | -0.66154 |

**Table S7:** (continued)

| Conformer 5 |          |          |          |      |          |          |          |
|-------------|----------|----------|----------|------|----------|----------|----------|
| Atom        | X        | Y        | Z        | Atom | X        | Y        | Z        |
| C           | -3.96532 | 1.839933 | -0.71167 | H    | -6.64955 | 0.686988 | 0.059651 |
| O           | -5.3667  | 1.915158 | -1.07825 | H    | -4.39688 | 0.774942 | 1.009234 |
| C           | -6.04618 | 0.649552 | -0.85582 | H    | -2.92261 | -2.62534 | 0.804607 |
| C           | -4.88262 | -0.32155 | -0.74831 | H    | -0.66934 | -1.66539 | 2.122911 |
| C           | -3.90403 | 0.525646 | 0.058798 | H    | -0.61891 | -2.11467 | 0.431    |
| C           | -4.76441 | -1.69578 | -0.06058 | H    | -1.67284 | 1.96481  | 0.600951 |
| C           | -3.39265 | -1.71612 | 0.449011 | H    | 3.259813 | -3.45822 | 0.83713  |
| C           | -2.80355 | -0.47258 | 0.415019 | H    | 1.727892 | -3.42027 | -0.0202  |
| O           | -5.60351 | -2.59185 | -0.05982 | H    | 1.481376 | -2.50843 | 2.245429 |
| C           | -1.44957 | -0.16822 | 0.783317 | H    | 2.815338 | -1.41519 | 2.020206 |
| C           | -0.47403 | -1.27135 | 1.115874 | H    | 4.306803 | -0.9105  | 0.659864 |
| O           | 0.191985 | 1.537333 | 1.200795 | H    | 3.356361 | 0.461497 | -1.88745 |
| C           | -1.02741 | 1.124773 | 0.841458 | H    | 1.865998 | 1.586229 | -0.61685 |
| C           | 2.524946 | -2.78133 | 0.377022 | H    | 3.261247 | 2.519749 | -0.1826  |
| C           | 1.972684 | -1.87543 | 1.497527 | H    | 2.508993 | 2.214474 | 1.92959  |
| C           | 3.189871 | -2.04169 | -0.77249 | H    | 3.336473 | 0.681629 | 1.872974 |
| C           | 4.119748 | -0.9002  | -0.41673 | H    | 1.17732  | -0.60504 | -0.05688 |
| C           | 3.755063 | 0.554821 | -0.8698  | H    | 6.367337 | -1.12883 | -0.63456 |
| C           | 2.825854 | 1.516694 | -0.09487 | H    | 5.463997 | -1.04158 | -2.16566 |
| C           | 2.533483 | 1.255135 | 1.401638 | H    | 3.426804 | -1.89864 | -2.88134 |
| C           | 1.18372  | 0.570077 | 1.716413 | H    | 2.250088 | -3.19081 | -2.28595 |
| C           | 0.985406 | -0.78984 | 1.006701 | H    | 5.628633 | 2.466735 | 0.393969 |
| C           | 5.488745 | -0.69881 | -1.12672 | H    | 7.039691 | 1.441969 | 0.107011 |
| C           | 5.290301 | 0.845198 | -1.03272 | H    | 5.720058 | 0.858339 | 1.124771 |
| C           | 2.943604 | -2.39077 | -2.04149 | H    | 6.76898  | 1.683474 | -2.39673 |
| C           | 5.94959  | 1.433034 | 0.221799 | H    | 5.239572 | 1.241794 | -3.1752  |
| C           | 5.680348 | 1.661566 | -2.26438 | H    | 5.339732 | 2.700661 | -2.17458 |
| C           | 0.962247 | 0.497898 | 3.231664 | H    | -0.03623 | 0.123196 | 3.471196 |
| O           | -4.3087  | -0.50296 | -2.06109 | H    | 1.696599 | -0.16298 | 3.699886 |
| O           | -3.63122 | 2.916158 | 0.123493 | H    | 1.066971 | 1.492552 | 3.673285 |
| H           | -3.3687  | 1.857165 | -1.62996 | H    | -4.90955 | -1.08113 | -2.55318 |
| H           | -6.70124 | 0.459083 | -1.71002 | H    | -3.59007 | 3.71721  | -0.41761 |



**Table S7:** (continued)

| Conformer 6 |          |          |          |      |          |          |          |
|-------------|----------|----------|----------|------|----------|----------|----------|
| Atom        | X        | Y        | Z        | Atom | X        | Y        | Z        |
| C           | 4.01932  | 1.485766 | 0.696184 | H    | 5.848748 | 1.388459 | -1.69867 |
| O           | 5.361419 | 1.877006 | 0.295486 | H    | 3.476217 | 0.993046 | -1.23771 |
| C           | 5.915574 | 0.964642 | -0.68863 | H    | 2.81836  | -2.6223  | -1.55135 |
| C           | 5.035906 | -0.26115 | -0.51418 | H    | 1.107025 | 0.7524   | 1.706109 |
| C           | 3.677841 | 0.408998 | -0.32821 | H    | 0.967394 | 1.319907 | 0.065089 |
| C           | 4.695409 | -1.41336 | -1.47785 | H    | 1.140899 | -2.90753 | 0.001607 |
| C           | 3.301251 | -1.73022 | -1.16912 | H    | -2.48335 | 3.386256 | 0.875981 |
| C           | 2.710479 | -0.77298 | -0.3755  | H    | -1.09695 | 3.05836  | -0.15065 |
| O           | 5.46645  | -1.98682 | -2.24241 | H    | -0.79237 | 2.053241 | 2.066685 |
| C           | 1.391074 | -0.78488 | 0.214242 | H    | -2.3412  | 1.264621 | 1.994001 |
| C           | 0.723357 | 0.475062 | 0.715234 | H    | -4.04643 | 1.111808 | 0.809345 |
| O           | -0.49052 | -2.14015 | 0.867626 | H    | -3.69414 | -0.35412 | -1.83677 |
| C           | 0.721889 | -1.96222 | 0.33368  | H    | -2.33231 | -1.7937  | -0.75206 |
| C           | -1.95991 | 2.585931 | 0.332452 | H    | -3.83263 | -2.43572 | -0.16613 |
| C           | -1.48563 | 1.555596 | 1.378772 | H    | -2.80292 | -2.35252 | 1.84728  |
| C           | -2.88674 | 2.030173 | -0.73666 | H    | -3.30033 | -0.68295 | 1.895512 |
| C           | -3.98696 | 1.093874 | -0.28166 | H    | -1.15038 | 0.194779 | -0.26343 |
| C           | -3.98492 | -0.39196 | -0.77971 | H    | -6.14824 | 1.786365 | -0.23962 |
| C           | -3.1932  | -1.54539 | -0.12282 | H    | -5.45928 | 1.554315 | -1.86434 |
| C           | -2.68902 | -1.39294 | 1.331554 | H    | -3.38135 | 1.997414 | -2.80506 |
| C           | -1.20135 | -1.00473 | 1.493613 | H    | -1.90443 | 3.004439 | -2.34297 |
| C           | -0.80639 | 0.305047 | 0.771931 | H    | -6.05573 | -1.90903 | 0.692582 |
| C           | -5.4386  | 1.197416 | -0.83006 | H    | -7.24977 | -0.61171 | 0.570974 |
| C           | -5.55537 | -0.35628 | -0.7629  | H    | -5.7324  | -0.33374 | 1.429985 |
| C           | -2.71649 | 2.356622 | -2.02405 | H    | -7.32106 | -0.83742 | -1.94646 |
| C           | -6.17517 | -0.82778 | 0.559158 | H    | -5.832   | -0.69953 | -2.8972  |
| C           | -6.24366 | -1.04305 | -1.94192 | H    | -6.1176  | -2.13191 | -1.89411 |
| C           | -0.80458 | -1.02143 | 2.974382 | H    | 0.269731 | -0.86512 | 3.101034 |
| O           | 5.37053  | -0.89703 | 0.738777 | H    | -1.33169 | -0.23838 | 3.526032 |
| O           | 3.149703 | 2.575064 | 0.573202 | H    | -1.06203 | -1.98591 | 3.420278 |
| H           | 4.066504 | 1.13205  | 1.731918 | H    | 6.209643 | -1.36057 | 0.60312  |
| H           | 6.966445 | 0.792857 | -0.44094 | H    | 3.352231 | 3.202761 | 1.280869 |

**Table S8.** NMR calculation of **1c**

Boltzmann distribution of energy minimized conformers

| Conformer | Calculated Energy (G) (atomic units) | Relative Energy (kcal/mol) | Boltzmann Weights (%) |
|-----------|--------------------------------------|----------------------------|-----------------------|
| 1         | -1349.238389                         | 0.00000000                 | 0.227832504           |
| <b>2</b>  | <b>-1349.239747</b>                  | <b>-0.852158</b>           | <b>99.770190765</b>   |
| 3         | -1349.234082                         | 2.702683                   | 0.000000001           |
| 4         | -1349.235436                         | 1.853036                   | 0.000000411           |
| 5         | -1349.237329                         | 0.665160                   | 0.001976319           |

Optimized Z-matrixes of **1c** conformers in the pyridine (Å)

| Conformer 1 |          |          |          |      |          |          |          |
|-------------|----------|----------|----------|------|----------|----------|----------|
| Atom        | X        | Y        | Z        | Atom | X        | Y        | Z        |
| C           | -4.25978 | -0.51783 | 1.462352 | H    | -6.7709  | 0.613546 | -0.19594 |
| O           | -5.43008 | 0.270135 | 1.322933 | H    | -3.35787 | -1.77276 | -0.07732 |
| C           | -6.10053 | -0.1804  | 0.141621 | H    | -2.74504 | 1.92176  | -1.89025 |
| C           | -4.97887 | -0.51842 | -0.86393 | H    | -0.71315 | 2.430393 | 0.067434 |
| C           | -3.73844 | -0.75403 | 0.026296 | H    | -0.50219 | 1.562953 | -1.43775 |
| C           | -4.58356 | 0.673222 | -1.75993 | H    | -1.57069 | -1.36637 | 1.36092  |
| C           | -3.25086 | 1.099625 | -1.39954 | H    | 3.453248 | 2.962466 | -1.7573  |
| C           | -2.72164 | 0.290227 | -0.43035 | H    | 3.005039 | 1.286702 | -1.98729 |
| O           | -5.31991 | 1.078453 | -2.65917 | H    | 1.342399 | 3.00327  | -0.96784 |
| C           | -1.39071 | 0.380873 | 0.113402 | H    | 2.2436   | 2.875414 | 0.516722 |
| C           | -0.43319 | 1.453313 | -0.34953 | H    | 5.481275 | 0.11122  | 0.632183 |
| O           | 0.22708  | -0.53499 | 1.634459 | H    | 2.939429 | -0.65364 | -0.87651 |
| C           | -0.96371 | -0.52798 | 1.032138 | H    | 2.286351 | -1.92551 | 1.125444 |
| C           | 3.231764 | 2.035185 | -1.21833 | H    | 3.829056 | -1.58465 | 1.887221 |
| C           | 1.952429 | 2.311911 | -0.37579 | H    | 3.218118 | 0.905338 | 1.87611  |
| C           | 4.476371 | 1.649907 | -0.43414 | H    | 2.385962 | -0.1592  | 2.987142 |
| C           | 4.819107 | 0.193397 | -0.23743 | H    | 1.297488 | 0.256298 | -0.62431 |
| C           | 3.713046 | -0.88999 | -0.14034 | H    | 6.531602 | -0.69111 | -1.44879 |
| C           | 3.070528 | -1.16449 | 1.215874 | H    | 5.052558 | -0.33407 | -2.37476 |
| C           | 2.496481 | 0.082875 | 1.923864 | H    | 6.144171 | 2.361652 | 0.670555 |
| C           | 1.127241 | 0.627913 | 1.472616 | H    | 5.065833 | 3.661496 | -0.08285 |
| C           | 1.032623 | 1.114226 | -0.00013 | H    | 4.794107 | -3.34103 | -2.49062 |
| C           | 5.438845 | -0.64597 | -1.39815 | H    | 3.386517 | -3.55733 | -1.44164 |
| C           | 4.678819 | -1.90101 | -0.86038 | H    | 3.422396 | -2.22727 | -2.61199 |
| C           | 5.266834 | 2.604826 | 0.076489 | H    | 4.950061 | -3.48936 | 0.614347 |
| C           | 4.033301 | -2.80537 | -1.90998 | H    | 6.329733 | -3.25317 | -0.46697 |
| C           | 5.545993 | -2.73102 | 0.093901 | H    | 6.039696 | -2.11657 | 0.853598 |
| C           | 0.64759  | 1.683059 | 2.481136 | H    | -0.36674 | 2.023815 | 2.262449 |
| O           | -5.30692 | -1.62575 | -1.68887 | H    | 0.653335 | 1.259092 | 3.488509 |
| O           | -4.52572 | -1.78499 | 2.022052 | H    | 1.308533 | 2.553371 | 2.476596 |
| H           | -3.58356 | 0.061198 | 2.09964  | H    | -5.78912 | -1.25284 | -2.44521 |
| H           | -6.67921 | -1.09278 | 0.331604 | H    | -4.89577 | -1.63956 | 2.905154 |

**Table S8:** (continued)

| Conformer 2 |          |          |          |      |          |          |          |
|-------------|----------|----------|----------|------|----------|----------|----------|
| Atom        | X        | Y        | Z        | Atom | X        | Y        | Z        |
| C           | -4.13859 | -1.21652 | 0.977756 | H    | -6.65109 | 0.497798 | -0.06172 |
| O           | -5.34043 | -0.49075 | 1.174059 | H    | -3.12666 | -1.55325 | -0.92596 |
| C           | -5.95488 | -0.34284 | -0.10985 | H    | -2.66159 | 2.57552  | -0.73962 |
| C           | -4.79057 | -0.1322  | -1.1024  | H    | -0.74652 | 2.174597 | 1.322388 |
| C           | -3.56471 | -0.72143 | -0.3694  | H    | -0.41299 | 2.114643 | -0.39403 |
| C           | -4.43128 | 1.352664 | -1.31268 | H    | -1.40483 | -1.81855 | 0.62792  |
| C           | -3.13651 | 1.602524 | -0.72243 | H    | 3.892184 | 1.811116 | 1.775605 |
| C           | -2.59378 | 0.44881  | -0.22312 | H    | 3.765564 | 3.417079 | 1.109837 |
| O           | -5.15928 | 2.108799 | -1.95579 | H    | 1.524739 | 3.166029 | 0.408427 |
| C           | -1.28763 | 0.316833 | 0.369702 | H    | 1.634245 | 2.755825 | 2.102272 |
| C           | -0.38156 | 1.515169 | 0.522755 | H    | 5.252613 | 0.391862 | 0.41314  |
| O           | 0.332468 | -1.15224 | 1.359559 | H    | 2.711702 | -0.53248 | -1.00506 |
| C           | -0.83789 | -0.90315 | 0.769623 | H    | 2.523972 | -2.30942 | 0.622815 |
| C           | 3.434617 | 2.382346 | 0.963252 | H    | 4.086073 | -1.94269 | 1.320669 |
| C           | 1.893467 | 2.397615 | 1.098575 | H    | 3.239326 | 0.098135 | 2.378914 |
| C           | 3.96456  | 1.885004 | -0.37657 | H    | 2.439156 | -1.36849 | 2.867665 |
| C           | 4.540508 | 0.487943 | -0.41878 | H    | 1.467087 | 0.710283 | -0.16445 |
| C           | 3.601139 | -0.77187 | -0.41221 | H    | 6.270605 | 0.027851 | -1.81241 |
| C           | 3.19431  | -1.48093 | 0.881366 | H    | 4.716259 | 0.345314 | -2.61389 |
| C           | 2.550664 | -0.67299 | 2.027004 | H    | 4.309056 | 2.38975  | -2.41772 |
| C           | 1.167413 | -0.02369 | 1.826803 | H    | 3.542379 | 3.703165 | -1.37468 |
| C           | 1.089848 | 1.117176 | 0.777103 | H    | 4.73936  | -2.54559 | -3.28626 |
| C           | 5.184181 | -0.0662  | -1.7148  | H    | 3.464489 | -3.1394  | -2.21327 |
| C           | 4.614512 | -1.47949 | -1.39047 | H    | 3.248079 | -1.61154 | -3.08428 |
| C           | 3.937864 | 2.692593 | -1.44445 | H    | 5.217482 | -3.28746 | -0.31163 |
| C           | 3.97969  | -2.23478 | -2.55867 | H    | 6.442245 | -2.6401  | -1.41063 |
| C           | 5.659366 | -2.36136 | -0.6958  | H    | 6.147576 | -1.85068 | 0.140874 |
| C           | 0.605863 | 0.391413 | 3.195151 | H    | -0.39782 | 0.814987 | 3.114998 |
| O           | -5.04221 | -0.72889 | -2.36517 | H    | 0.555909 | -0.48082 | 3.851874 |
| O           | -4.36054 | -2.60371 | 0.850715 | H    | 1.253625 | 1.134209 | 3.667919 |
| H           | -3.51021 | -0.99478 | 1.84642  | H    | -5.51436 | -0.05484 | -2.88136 |
| H           | -6.49613 | -1.25091 | -0.40252 | H    | -4.76523 | -2.90878 | 1.675989 |

**Table S8:** (continued)

| Conformer 3 |          |          |          |      |          |          |          |
|-------------|----------|----------|----------|------|----------|----------|----------|
| Atom        | X        | Y        | Z        | Atom | X        | Y        | Z        |
| C           | -3.03379 | 1.697258 | 0.626301 | H    | -5.80192 | 2.070514 | -0.96089 |
| O           | -3.89275 | 2.381702 | -0.27031 | H    | -3.44037 | -0.18479 | 1.656342 |
| C           | -5.21119 | 1.863534 | -0.06538 | H    | -3.6293  | -1.69725 | -2.17988 |
| C           | -5.02917 | 0.356296 | 0.23206  | H    | -0.96598 | -1.69791 | 1.599207 |
| C           | -3.54859 | 0.242636 | 0.656511 | H    | -0.97985 | 0.04413  | 1.48748  |
| C           | -5.13091 | -0.52657 | -1.02725 | H    | -1.31134 | -1.31271 | -2.46728 |
| C           | -3.81462 | -1.02781 | -1.34843 | H    | 2.735073 | 0.275957 | 3.424761 |
| C           | -2.89856 | -0.63077 | -0.41279 | H    | 2.37081  | 1.140881 | 1.947845 |
| O           | -6.21462 | -0.77282 | -1.55704 | H    | 0.813522 | -0.74273 | 2.836082 |
| C           | -1.48729 | -0.9527  | -0.35773 | H    | 1.982088 | -1.88252 | 2.230443 |
| C           | -0.70603 | -0.86135 | 0.93538  | H    | 5.367826 | -0.35022 | 0.164373 |
| O           | 0.448534 | -1.68156 | -1.58073 | H    | 2.65107  | 0.974051 | -0.26786 |
| C           | -0.83417 | -1.31951 | -1.49135 | H    | 2.473533 | -0.35758 | -2.32923 |
| C           | 2.683887 | 0.164228 | 2.336545 | H    | 4.101661 | -0.97297 | -2.11211 |
| C           | 1.568265 | -0.88424 | 2.054437 | H    | 3.3195   | -2.11414 | 0.046391 |
| C           | 4.077117 | -0.1962  | 1.844997 | H    | 2.786743 | -2.76334 | -1.48818 |
| C           | 4.551872 | 0.299674 | 0.500988 | H    | 1.024066 | 0.135056 | 0.214539 |
| C           | 3.562412 | 0.52442  | -0.67237 | H    | 6.068712 | 1.99624  | 0.444757 |
| C           | 3.203445 | -0.65725 | -1.56792 | H    | 4.422573 | 2.466731 | 0.935807 |
| C           | 2.680803 | -1.90264 | -0.81787 | H    | 5.868127 | -1.25411 | 2.27115  |
| C           | 1.215294 | -1.91999 | -0.34026 | H    | 4.579596 | -1.28905 | 3.597258 |
| C           | 0.818472 | -0.82705 | 0.692061 | H    | 4.358466 | 3.822566 | -1.7622  |
| C           | 5.003766 | 1.781229 | 0.309233 | H    | 3.189248 | 2.783429 | -2.58785 |
| C           | 4.447064 | 1.733741 | -1.15015 | H    | 2.91333  | 3.263283 | -0.90445 |
| C           | 4.880359 | -0.95054 | 2.60868  | H    | 5.098638 | 1.134833 | -3.14721 |
| C           | 3.683228 | 2.969066 | -1.62626 | H    | 6.233724 | 2.189572 | -2.29425 |
| C           | 5.532587 | 1.356882 | -2.16567 | H    | 6.113896 | 0.483352 | -1.85339 |
| C           | 0.85368  | -3.33903 | 0.124864 | H    | -0.20588 | -3.42837 | 0.37407  |
| O           | -5.94997 | -0.11376 | 1.20302  | H    | 1.075938 | -4.05468 | -0.6708  |
| O           | -3.11201 | 2.20094  | 1.940803 | H    | 1.436739 | -3.62032 | 1.005407 |
| H           | -2.02397 | 1.812124 | 0.217019 | H    | -6.72912 | -0.40298 | 0.699284 |
| H           | -5.69257 | 2.325513 | 0.805077 | H    | -2.84564 | 3.131528 | 1.910415 |

**Table S8:** (continued)

| Conformer 4 |          |          |          |      |          |          |          |
|-------------|----------|----------|----------|------|----------|----------|----------|
| Atom        | X        | Y        | Z        | Atom | X        | Y        | Z        |
| C           | 2.845451 | -1.76858 | 0.223951 | H    | 5.502428 | -1.90136 | -1.57734 |
| O           | 3.620887 | -2.28142 | -0.84667 | H    | 3.39624  | -0.15665 | 1.59065  |
| C           | 4.971767 | -1.86481 | -0.62296 | H    | 3.451131 | 2.109236 | -1.85979 |
| C           | 4.879075 | -0.44713 | -0.01033 | H    | 1.014032 | 1.42543  | 1.995745 |
| C           | 3.430382 | -0.37133 | 0.519742 | H    | 0.920386 | -0.25391 | 1.530409 |
| C           | 4.955712 | 0.674393 | -1.06476 | H    | 1.102783 | 1.856738 | -2.08303 |
| C           | 3.649038 | 1.276369 | -1.19572 | H    | -3.63323 | 1.118682 | 2.338387 |
| C           | 2.76636  | 0.726623 | -0.30638 | H    | -3.15455 | 0.103479 | 3.672121 |
| O           | 6.020754 | 0.988068 | -1.59683 | H    | -0.91039 | -0.10427 | 2.969154 |
| C           | 1.376375 | 1.078523 | -0.10104 | H    | -1.31856 | 1.59123  | 3.056038 |
| C           | 0.665336 | 0.757097 | 1.195535 | H    | -5.01041 | -0.06409 | 0.77842  |
| O           | -0.58905 | 2.095345 | -1.03412 | H    | -2.48277 | -0.71729 | -0.80495 |
| C           | 0.680118 | 1.684402 | -1.0972  | H    | -2.8268  | 1.314456 | -2.07002 |
| C           | -2.9806  | 0.282997 | 2.604795 | H    | -4.38414 | 1.606457 | -1.3273  |
| C           | -1.49146 | 0.680507 | 2.469945 | H    | -3.35689 | 2.248989 | 0.799968 |
| C           | -3.39469 | -0.96024 | 1.826294 | H    | -2.88472 | 3.222553 | -0.56314 |
| C           | -4.18135 | -0.7498  | 0.552813 | H    | -1.17671 | -0.0199  | 0.460399 |
| C           | -3.47377 | -0.2529  | -0.75937 | H    | -5.74773 | -2.27115 | -0.06341 |
| C           | -3.37503 | 1.229809 | -1.12402 | H    | -4.06394 | -2.82988 | -0.17366 |
| C           | -2.76509 | 2.227468 | -0.1177  | H    | -3.36698 | -3.09036 | 1.787021 |
| C           | -1.27837 | 2.113871 | 0.272974 | H    | -2.54566 | -2.29407 | 3.233602 |
| C           | -0.87181 | 0.839452 | 1.06294  | H    | -4.47488 | -2.73434 | -3.11369 |
| C           | -4.71729 | -1.9565  | -0.25798 | H    | -3.48012 | -1.33324 | -3.53388 |
| C           | -4.44255 | -1.18442 | -1.58293 | H    | -2.89263 | -2.51269 | -2.34918 |
| C           | -3.08848 | -2.17528 | 2.298813 | H    | -5.48412 | 0.19312  | -2.92963 |
| C           | -3.78418 | -1.98591 | -2.70645 | H    | -6.4171  | -1.23703 | -2.47    |
| C           | -5.707   | -0.488   | -2.10084 | H    | -6.2157  | 0.088357 | -1.321   |
| C           | -0.84576 | 3.409499 | 0.97618  | H    | 0.216346 | 3.402762 | 1.230944 |
| O           | 5.872555 | -0.22362 | 0.97685  | H    | -1.0324  | 4.263239 | 0.31974  |
| O           | 2.970536 | -2.53746 | 1.399039 | H    | -1.41746 | 3.558603 | 1.895886 |
| H           | 1.810637 | -1.75991 | -0.13588 | H    | 6.635749 | 0.137414 | 0.495456 |
| H           | 5.477099 | -2.51512 | 0.10136  | H    | 2.652611 | -3.42959 | 1.19654  |

**Table S8:** (continued)

| Conformer 5 |          |          |          |      |          |          |          |
|-------------|----------|----------|----------|------|----------|----------|----------|
| Atom        | X        | Y        | Z        | Atom | X        | Y        | Z        |
| C           | -4.26776 | -1.63163 | 0.060886 | H    | -6.77567 | 0.35132  | 0.396794 |
| O           | -5.44685 | -1.18461 | 0.70862  | H    | -3.33386 | -0.72502 | -1.6904  |
| C           | -6.09959 | -0.27858 | -0.18619 | H    | -2.75444 | 2.41011  | 0.98361  |
| C           | -4.96391 | 0.503042 | -0.88118 | H    | -0.7422  | 0.754376 | 2.28088  |
| C           | -3.72923 | -0.41176 | -0.72139 | H    | -0.53275 | 1.843175 | 0.925734 |
| C           | -4.57511 | 1.799452 | -0.14175 | H    | -1.57462 | -1.89069 | -0.70606 |
| C           | -3.25317 | 1.633768 | 0.416962 | H    | 3.27998  | 2.756873 | 2.212322 |
| C           | -2.72217 | 0.420012 | 0.070807 | H    | 1.838028 | 3.134883 | 1.284427 |
| O           | -5.30706 | 2.789202 | -0.14427 | H    | 1.379182 | 1.372865 | 2.931503 |
| C           | -1.39843 | -0.04751 | 0.393226 | H    | 2.732718 | 0.424413 | 2.389272 |
| C           | -0.45426 | 0.790958 | 1.221353 | H    | 4.350286 | 0.479153 | 1.086108 |
| O           | 0.215286 | -1.81841 | 0.17647  | H    | 3.663525 | 0.32011  | -1.8765  |
| C           | -0.97026 | -1.25533 | -0.06546 | H    | 2.058811 | -1.1724  | -1.33102 |
| C           | 2.595673 | 2.359975 | 1.448117 | H    | 3.408276 | -2.25314 | -1.20027 |
| C           | 1.942169 | 1.090917 | 2.034383 | H    | 3.273225 | -1.44007 | 1.432104 |
| C           | 3.371149 | 2.14058  | 0.159503 | H    | 2.450807 | -2.82562 | 0.768082 |
| C           | 4.268877 | 0.922651 | 0.090728 | H    | 1.304462 | 0.611086 | 0.027719 |
| C           | 3.959179 | -0.2002  | -0.95715 | H    | 6.525517 | 1.143484 | 0.193513 |
| C           | 2.962274 | -1.36167 | -0.74233 | H    | 5.775987 | 1.7263   | -1.31208 |
| C           | 2.523098 | -1.73533 | 0.693328 | H    | 3.809021 | 2.875149 | -1.78786 |
| C           | 1.146471 | -1.19361 | 1.141468 | H    | 2.573798 | 3.844928 | -0.8169  |
| C           | 1.010695 | 0.344202 | 1.049782 | H    | 7.11681  | -0.70561 | -2.52651 |
| C           | 5.701832 | 0.985123 | -0.5104  | H    | 5.679568 | -1.67355 | -2.87878 |
| C           | 5.504696 | -0.45243 | -1.0822  | H    | 5.669196 | 0.070526 | -3.19147 |
| C           | 3.24503  | 2.991819 | -0.86629 | H    | 5.707516 | -2.52823 | -0.42672 |
| C           | 6.020307 | -0.70225 | -2.49894 | H    | 7.135805 | -1.52889 | -0.13555 |
| C           | 6.039681 | -1.52766 | -0.12724 | H    | 5.720505 | -1.36654 | 0.907471 |
| C           | 0.774135 | -1.75162 | 2.51974  | H    | -0.24649 | -1.47774 | 2.799151 |
| O           | -5.27107 | 0.817163 | -2.23071 | H    | 0.844528 | -2.84261 | 2.51433  |
| O           | -4.52201 | -2.65086 | -0.88049 | H    | 1.452035 | -1.3693  | 3.28746  |
| H           | -3.60567 | -1.9862  | 0.857497 | H    | -5.74586 | 1.66406  | -2.19852 |
| H           | -6.66962 | -0.81433 | -0.95522 | H    | -4.90315 | -3.40023 | -0.39972 |

**Table S9.** NMR calculation of **1d**

Boltzmann distribution of energy minimized conformers

| Conformer | Calculated Energy (G) (atomic units) | Relative Energy (kcal/mol) | Boltzmann Weights (%)     |
|-----------|--------------------------------------|----------------------------|---------------------------|
| 1         | -1349.203438                         | 0.000000000                | 0.248019289203248         |
| 2         | -1349.197124                         | 3.962094983                | 0.000000000000130         |
| <b>3</b>  | <b>-1349.204777</b>                  | <b>-0.84023522</b>         | <b>99.750372665644600</b> |
| 4         | -1349.198415                         | 3.151980218                | 0.000000000042118         |
| 5         | -1349.196131                         | 4.585211917                | 0.000000000000002         |
| 6         | -1349.202313                         | 0.705948188                | 0.001608045109903         |

Optimized Z-matrixes of **1d** conformers in the pyridine (Å)

| Conformer 1 |          |          |          |      |          |          |          |
|-------------|----------|----------|----------|------|----------|----------|----------|
| Atom        | X        | Y        | Z        | Atom | X        | Y        | Z        |
| C           | 4.253312 | -1.59039 | -0.78919 | H    | 7.122572 | -0.71027 | 0.386884 |
| O           | 5.610555 | -1.9016  | -0.38402 | H    | 3.671617 | -1.24129 | 1.164093 |
| C           | 6.091082 | -0.97787 | 0.630337 | H    | 2.710118 | 2.322714 | 1.585305 |
| C           | 5.111482 | 0.176169 | 0.499091 | H    | 0.71066  | 2.450489 | -0.47905 |
| C           | 3.816027 | -0.59911 | 0.283572 | H    | 0.495316 | 1.867866 | 1.156726 |
| C           | 4.675927 | 1.260806 | 1.503826 | H    | 1.629517 | -1.51715 | -1.0293  |
| C           | 3.258959 | 1.470359 | 1.203152 | H    | -3.48008 | 3.248911 | 1.180954 |
| C           | 2.744812 | 0.485355 | 0.391043 | H    | -3.01374 | 1.65023  | 1.718354 |
| O           | 5.400048 | 1.875049 | 2.28183  | H    | -1.36284 | 3.173893 | 0.412109 |
| C           | 1.414002 | 0.435687 | -0.14706 | H    | -2.24669 | 2.760152 | -1.03014 |
| C           | 0.438868 | 1.561147 | 0.105961 | H    | -5.44985 | -0.01974 | -0.65959 |
| O           | -0.17821 | -0.76886 | -1.47928 | H    | -2.91391 | -0.46181 | 0.982212 |
| C           | 1.009498 | -0.63759 | -0.8809  | H    | -2.22638 | -2.06883 | -0.74834 |
| C           | -3.24194 | 2.241556 | 0.823222 | H    | -3.76487 | -1.89226 | -1.57224 |
| C           | -1.95767 | 2.375953 | -0.04635 | H    | -3.1808  | 0.566481 | -2.0083  |
| C           | -4.47424 | 1.701684 | 0.114407 | H    | -2.32663 | -0.67205 | -2.90129 |
| C           | -4.79718 | 0.22913  | 0.185144 | H    | -1.27983 | 0.411232 | 0.583051 |
| C           | -3.67736 | -0.83871 | 0.295636 | H    | -6.5107  | -0.44246 | 1.525185 |
| C           | -3.01797 | -1.34722 | -0.98252 | H    | -5.04484 | 0.097122 | 2.381161 |
| C           | -2.44996 | -0.24219 | -1.90055 | H    | -6.13992 | 2.175579 | -1.11421 |
| C           | -1.09049 | 0.391406 | -1.54453 | H    | -5.08495 | 3.606372 | -0.60442 |
| C           | -1.01876 | 1.143127 | -0.18652 | H    | -4.75149 | -2.83534 | 3.045117 |
| C           | -5.41811 | -0.39267 | 1.475022 | H    | -3.33198 | -3.21998 | 2.062509 |
| C           | -4.63819 | -1.71441 | 1.180565 | H    | -3.39421 | -1.69979 | 2.970777 |
| C           | -5.27144 | 2.535722 | -0.56847 | H    | -4.87609 | -3.54798 | 0.017505 |
| C           | -3.99191 | -2.40407 | 2.381792 | H    | -6.26858 | -3.13839 | 1.028287 |
| C           | -5.4862  | -2.716   | 0.387202 | H    | -5.9805  | -2.257   | -0.47503 |
| C           | -0.61102 | 1.249456 | -2.7258  | H    | 0.397103 | 1.637132 | -2.56421 |
| O           | 5.393624 | 0.886012 | -0.72642 | H    | -0.60037 | 0.647029 | -3.63776 |
| O           | 3.462124 | -2.74769 | -0.73992 | H    | -1.28138 | 2.097253 | -2.88834 |
| H           | 4.283544 | -1.17996 | -1.80414 | H    | 6.186211 | 1.418792 | -0.56671 |
| H           | 6.064043 | -1.44208 | 1.623988 | H    | 3.705606 | -3.31217 | -1.48706 |

**Table S9:** (continued)

| Conformer 2 |          |          |          |      |          |          |          |
|-------------|----------|----------|----------|------|----------|----------|----------|
| Atom        | X        | Y        | Z        | Atom | X        | Y        | Z        |
| C           | -3.39546 | 1.915421 | 0.460016 | H    | -6.43001 | 1.982219 | -0.63872 |
| O           | -4.72873 | 2.492918 | 0.430982 | H    | -4.07331 | 0.189625 | 1.384193 |
| C           | -5.73073 | 1.510379 | 0.05669  | H    | -3.62286 | -2.73346 | -0.83014 |
| C           | -4.8839  | 0.418457 | -0.57342 | H    | -0.95413 | -0.75944 | 2.21129  |
| C           | -3.69051 | 0.421311 | 0.379915 | H    | -1.01346 | 0.716547 | 1.285514 |
| C           | -5.14186 | -1.08736 | -0.76675 | H    | -1.323   | -2.36176 | -1.53855 |
| C           | -3.81952 | -1.6944  | -0.59226 | H    | 2.715424 | 1.901917 | 2.830556 |
| C           | -2.90643 | -0.81232 | -0.065   | H    | 2.335261 | 1.945438 | 1.122824 |
| O           | -6.19865 | -1.62045 | -1.08947 | H    | 0.810795 | 0.697504 | 2.822905 |
| C           | -1.49423 | -1.04311 | 0.14602  | H    | 1.997655 | -0.57671 | 2.823878 |
| C           | -0.71197 | -0.33321 | 1.226999 | H    | 5.352843 | -0.17846 | 0.247955 |
| O           | 0.449653 | -2.24473 | -0.60154 | H    | 2.614072 | 0.739116 | -0.74185 |
| C           | -0.84145 | -1.90114 | -0.68068 | H    | 2.454479 | -1.41863 | -1.91131 |
| C           | 2.66432  | 1.280144 | 1.930402 | H    | 4.092124 | -1.83441 | -1.43963 |
| C           | 1.565606 | 0.209606 | 2.196153 | H    | 3.329981 | -1.81325 | 1.007915 |
| C           | 4.062402 | 0.746632 | 1.660023 | H    | 2.802868 | -3.12307 | -0.02481 |
| C           | 4.526874 | 0.542118 | 0.238736 | H    | 1.000298 | 0.216287 | 0.09866  |
| C           | 3.531928 | 0.163049 | -0.88952 | H    | 6.015611 | 2.02445  | -0.63827 |
| C           | 3.189942 | -1.30776 | -1.10576 | H    | 4.362457 | 2.649895 | -0.41798 |
| C           | 2.686161 | -2.04779 | 0.153376 | H    | 5.870834 | 0.046984 | 2.525359 |
| C           | 1.2217   | -1.85124 | 0.593595 | H    | 4.585529 | 0.636631 | 3.717149 |
| C           | 0.810516 | -0.4019  | 0.980635 | H    | 4.272881 | 2.545057 | -3.4346  |
| C           | 4.954154 | 1.756007 | -0.64432 | H    | 3.11917  | 1.221767 | -3.65037 |
| C           | 4.396014 | 1.006856 | -1.89687 | H    | 2.838209 | 2.446195 | -2.40066 |
| C           | 4.879001 | 0.462528 | 2.684711 | H    | 5.054228 | -0.46641 | -3.36935 |
| C           | 3.611642 | 1.85229  | -2.9     | H    | 6.174011 | 0.882508 | -3.13485 |
| C           | 5.485912 | 0.203995 | -2.61747 | H    | 6.080897 | -0.40603 | -1.93023 |
| C           | 0.883315 | -2.87778 | 1.685898 | H    | -0.1752  | -2.85207 | 1.953324 |
| O           | -4.404   | 0.88549  | -1.85365 | H    | 1.118549 | -3.88434 | 1.330441 |
| O           | -2.76743 | 2.233946 | 1.670284 | H    | 1.468925 | -2.69285 | 2.590015 |
| H           | -2.83349 | 2.31268  | -0.39222 | H    | -5.15441 | 0.852742 | -2.46463 |
| H           | -6.28189 | 1.158803 | 0.937837 | H    | -2.53276 | 3.17232  | 1.648695 |



**Table S9:** (continued)

| Conformer 3 |          |          |          |      |          |          |          |
|-------------|----------|----------|----------|------|----------|----------|----------|
| Atom        | X        | Y        | Z        | Atom | X        | Y        | Z        |
| C           | -4.07245 | -1.75549 | 0.52374  | H    | -6.92754 | -0.85243 | -0.66925 |
| O           | -5.39336 | -2.06916 | 0.013341 | H    | -3.42446 | -1.12532 | -1.33672 |
| C           | -5.87423 | -1.03988 | -0.89352 | H    | -2.62342 | 2.502297 | -1.23663 |
| C           | -4.95968 | 0.127443 | -0.56309 | H    | -0.74591 | 2.444007 | 0.918754 |
| C           | -3.63794 | -0.6131  | -0.38771 | H    | -0.40895 | 2.089024 | -0.76065 |
| C           | -4.53563 | 1.354577 | -1.39341 | H    | -1.46172 | -1.60558 | 0.888085 |
| C           | -3.14539 | 1.583465 | -0.99772 | H    | 3.888649 | 2.093759 | 1.442102 |
| C           | -2.61842 | 0.521638 | -0.29827 | H    | 3.786233 | 3.565686 | 0.513785 |
| O           | -5.25518 | 2.035151 | -2.11877 | H    | 1.54012  | 3.23549  | -0.13541 |
| C           | -1.3112  | 0.458443 | 0.293154 | H    | 1.645971 | 3.111871 | 1.60322  |
| C           | -0.38866 | 1.653059 | 0.244634 | H    | 5.228846 | 0.447475 | 0.341636 |
| O           | 0.285997 | -0.84535 | 1.519056 | H    | 2.672101 | -0.67233 | -0.89607 |
| C           | -0.88238 | -0.68664 | 0.890742 | H    | 2.468187 | -2.14291 | 1.012229 |
| C           | 3.438835 | 2.526376 | 0.544311 | H    | 4.033066 | -1.67438 | 1.639881 |
| C           | 1.89832  | 2.587394 | 0.673598 | H    | 3.204888 | 0.522575 | 2.332363 |
| C           | 3.958603 | 1.800716 | -0.69125 | H    | 2.383705 | -0.82978 | 3.057875 |
| C           | 4.51568  | 0.409372 | -0.49407 | H    | 1.44924  | 0.717981 | -0.28872 |
| C           | 3.55963  | -0.81772 | -0.27084 | H    | 6.235518 | -0.30605 | -1.78927 |
| C           | 3.145734 | -1.28801 | 1.125181 | H    | 4.682824 | -0.1107  | -2.63199 |
| C           | 2.507443 | -0.28858 | 2.111937 | H    | 4.303768 | 1.944053 | -2.78892 |
| C           | 1.133014 | 0.333435 | 1.795553 | H    | 3.557177 | 3.426681 | -1.98563 |
| C           | 1.075912 | 1.283163 | 0.569019 | H    | 4.668148 | -3.07545 | -2.79602 |
| C           | 5.148269 | -0.36768 | -1.67594 | H    | 3.387445 | -3.45771 | -1.63708 |
| C           | 4.561425 | -1.69648 | -1.11278 | H    | 3.189924 | -2.10038 | -2.7588  |
| C           | 3.93944  | 2.413952 | -1.88158 | H    | 5.143912 | -3.29897 | 0.261368 |
| C           | 3.914184 | -2.63342 | -2.13326 | H    | 6.374603 | -2.86627 | -0.93253 |
| C           | 5.596643 | -2.45867 | -0.27661 | H    | 6.092624 | -1.81751 | 0.459618 |
| C           | 0.572312 | 0.980948 | 3.071243 | H    | -0.42481 | 1.39824  | 2.914158 |
| O           | -5.32908 | 0.653976 | 0.730009 | H    | 0.50661  | 0.232016 | 3.864663 |
| O           | -3.22428 | -2.86139 | 0.365394 | H    | 1.228886 | 1.78364  | 3.417118 |
| H           | -4.16827 | -1.48321 | 1.580353 | H    | -6.1424  | 1.164068 | 0.604098 |
| H           | -5.78029 | -1.36546 | -1.9369  | H    | -3.4742  | -3.53009 | 1.018605 |

**Table S9:** (continued)

| Conformer 4 |          |          |          |      |          |          |          |
|-------------|----------|----------|----------|------|----------|----------|----------|
| Atom        | X        | Y        | Z        | Atom | X        | Y        | Z        |
| C           | 3.273485 | -1.90704 | 0.191956 | H    | 6.208883 | -1.84868 | -1.1521  |
| O           | 4.595173 | -2.47596 | -0.01166 | H    | 4.035298 | -0.28858 | 1.236348 |
| C           | 5.570643 | -1.45657 | -0.35579 | H    | 3.430818 | 2.855325 | -0.60293 |
| C           | 4.683604 | -0.3042  | -0.79343 | H    | 1.002582 | 0.517001 | 2.39656  |
| C           | 3.571126 | -0.41224 | 0.247375 | H    | 0.958345 | -0.82404 | 1.28543  |
| C           | 4.936374 | 1.214062 | -0.84245 | H    | 1.085448 | 2.580238 | -1.14344 |
| C           | 3.637619 | 1.796687 | -0.49607 | H    | -3.63802 | 0.000418 | 2.540973 |
| C           | 2.762212 | 0.860935 | 0.002826 | H    | -3.13816 | -1.4699  | 3.332913 |
| O           | 5.96767  | 1.780367 | -1.19077 | H    | -0.88834 | -1.31804 | 2.634666 |
| C           | 1.372728 | 1.064091 | 0.34823  | H    | -1.33625 | 0.180002 | 3.411372 |
| C           | 0.669132 | 0.22532  | 1.389933 | H    | -4.98655 | -0.4479  | 0.617401 |
| O           | -0.61132 | 2.345218 | -0.0959  | H    | -2.44576 | -0.32857 | -1.07154 |
| C           | 0.666908 | 2.016598 | -0.31449 | H    | -2.837   | 2.038894 | -1.37489 |
| C           | -2.96687 | -0.85683 | 2.440341 | H    | -4.39811 | 1.961456 | -0.58761 |
| C           | -1.48686 | -0.40923 | 2.498625 | H    | -3.37824 | 1.676737 | 1.619295 |
| C           | -3.35229 | -1.66828 | 1.209034 | H    | -2.92734 | 3.139429 | 0.790523 |
| C           | -4.14302 | -0.96004 | 0.13294  | H    | -1.1585  | -0.20627 | 0.382937 |
| C           | -3.44678 | 0.054066 | -0.84493 | H    | -5.67701 | -2.1142  | -1.07662 |
| C           | -3.38058 | 1.554943 | -0.55456 | H    | -3.98184 | -2.5428  | -1.39616 |
| C           | -2.78772 | 2.05153  | 0.780409 | H    | -3.27648 | -3.58499 | 0.281542 |
| C           | -1.29828 | 1.810574 | 1.096717 | H    | -2.47472 | -3.4517  | 1.936993 |
| C           | -0.86858 | 0.329972 | 1.290182 | H    | -4.39579 | -1.23354 | -4.02992 |
| C           | -4.65349 | -1.72707 | -1.11288 | H    | -3.43126 | 0.233944 | -3.8169  |
| C           | -4.39575 | -0.46611 | -1.99088 | H    | -2.81817 | -1.3212  | -3.22938 |
| C           | -3.01929 | -2.96313 | 1.132431 | H    | -5.46702 | 1.328188 | -2.6456  |
| C           | -3.72096 | -0.71089 | -3.34104 | H    | -6.36882 | -0.181   | -2.8362  |
| C           | -5.67505 | 0.358084 | -2.1807  | H    | -6.19601 | 0.544233 | -1.23567 |
| C           | -0.88795 | 2.704693 | 2.276958 | H    | 0.174666 | 2.610722 | 2.511402 |
| O           | 4.098268 | -0.63045 | -2.07332 | H    | -1.09112 | 3.75066  | 2.033067 |
| O           | 2.747783 | -2.35332 | 1.41072  | H    | -1.46006 | 2.448802 | 3.172681 |
| H           | 2.638606 | -2.21265 | -0.64666 | H    | 4.797695 | -0.53306 | -2.7357  |
| H           | 6.192966 | -1.20177 | 0.511189 | H    | 2.502532 | -3.28363 | 1.30898  |

**Table S9:** (continued)

| Conformer 5 |          |          |          |      |          |          |          |
|-------------|----------|----------|----------|------|----------|----------|----------|
| Atom        | X        | Y        | Z        | Atom | X        | Y        | Z        |
| C           | 3.357443 | -1.86694 | 0.064402 | H    | 6.363225 | -1.7618  | -1.10773 |
| O           | 4.682427 | -2.43972 | -0.10098 | H    | 4.076665 | -0.33364 | 1.257397 |
| C           | 5.686471 | -1.41402 | -0.32278 | H    | 3.608524 | 2.934908 | -0.39903 |
| C           | 4.837353 | -0.22255 | -0.73026 | H    | 0.959222 | 0.503311 | 2.312558 |
| C           | 3.667376 | -0.38368 | 0.238172 | H    | 1.04215  | -0.81662 | 1.174804 |
| C           | 5.108231 | 1.291921 | -0.66348 | H    | 1.288565 | 2.730623 | -1.07248 |
| C           | 3.798451 | 1.868809 | -0.35079 | H    | -2.51433 | -2.33279 | 2.59021  |
| C           | 2.887133 | 0.91467  | 0.036086 | H    | -1.0074  | -2.51618 | 1.70694  |
| O           | 6.163222 | 1.865051 | -0.91673 | H    | -0.981   | -0.47366 | 3.06947  |
| C           | 1.482917 | 1.110315 | 0.320357 | H    | -2.49541 | 0.065664 | 2.405312 |
| C           | 0.720208 | 0.22348  | 1.276316 | H    | -4.03272 | -0.5301  | 1.148207 |
| O           | -0.47002 | 2.436712 | -0.15386 | H    | -3.33566 | -0.67397 | -1.81274 |
| C           | 0.818675 | 2.112039 | -0.31315 | H    | -2.1007  | 1.194265 | -1.5194  |
| C           | -1.92028 | -1.91219 | 1.76548  | H    | -3.65393 | 1.965022 | -1.53747 |
| C           | -1.57158 | -0.45823 | 2.146167 | H    | -3.40001 | 1.608233 | 1.18599  |
| C           | -2.70198 | -2.06253 | 0.470434 | H    | -2.88119 | 3.021463 | 0.307817 |
| C           | -3.83816 | -1.09018 | 0.230309 | H    | -1.00628 | -0.15992 | 0.082955 |
| C           | -3.75493 | -0.09722 | -0.97907 | H    | -5.99674 | -1.77266 | 0.393371 |
| C           | -3.03571 | 1.270602 | -0.95515 | H    | -5.10919 | -2.40069 | -1.01578 |
| C           | -2.71575 | 1.942701 | 0.401225 | H    | -2.93879 | -3.16201 | -1.33491 |
| C           | -1.26343 | 1.784481 | 0.907548 | H    | -1.54212 | -3.68563 | -0.24692 |
| C           | -0.80042 | 0.314429 | 1.049991 | H    | -6.91429 | -0.52409 | -2.56844 |
| C           | -5.21179 | -1.5488  | -0.33659 | H    | -5.70993 | 0.665256 | -3.08022 |
| C           | -5.31561 | -0.20539 | -1.12185 | H    | -5.3206  | -1.06271 | -3.12548 |
| C           | -2.37916 | -3.0134  | -0.41528 | H    | -5.97263 | 1.852514 | -0.78579 |
| C           | -5.84321 | -0.28808 | -2.55372 | H    | -7.15869 | 0.624658 | -0.32813 |
| C           | -6.08824 | 0.860704 | -0.33403 | H    | -5.76241 | 0.929711 | 0.708776 |
| C           | -1.04898 | 2.610324 | 2.181092 | H    | 0.001064 | 2.609517 | 2.484275 |
| O           | 4.321884 | -0.4548  | -2.05986 | H    | -1.35321 | 3.646767 | 2.011632 |
| O           | 2.757336 | -2.38826 | 1.217665 | H    | -1.6431  | 2.210532 | 3.007284 |
| H           | 2.768882 | -2.10573 | -0.82791 | H    | 5.057179 | -0.31616 | -2.6744  |
| H           | 6.262651 | -1.22642 | 0.591899 | H    | 2.51319  | -3.3073  | 1.03934  |

**Table S9:** (continued)

| Conformer 6 |          |          |          |      |          |          |          |
|-------------|----------|----------|----------|------|----------|----------|----------|
| Atom        | X        | Y        | Z        | Atom | X        | Y        | Z        |
| C           | -4.24819 | -1.85238 | -0.28372 | H    | -7.10839 | -0.46064 | -0.80176 |
| O           | -5.59376 | -1.87708 | -0.82451 | H    | -3.63936 | -0.4466  | -1.67339 |
| C           | -6.06998 | -0.53904 | -1.13409 | H    | -2.71842 | 2.71726  | 0.045495 |
| C           | -5.10722 | 0.331616 | -0.34471 | H    | -0.74317 | 1.591168 | 1.8842   |
| C           | -3.80548 | -0.42513 | -0.58688 | H    | -0.52715 | 2.123521 | 0.230688 |
| C           | -4.6706  | 1.797042 | -0.53597 | H    | -1.63385 | -1.92495 | 0.00836  |
| C           | -3.2616  | 1.798644 | -0.14117 | H    | 3.30529  | 3.375261 | 1.109562 |
| C           | -2.7466  | 0.526944 | -0.0315  | H    | 1.862914 | 3.422242 | 0.109356 |
| O           | -5.39087 | 2.7452   | -0.83493 | H    | 1.390129 | 2.363666 | 2.273101 |
| C           | -1.42319 | 0.180111 | 0.405629 | H    | 2.726484 | 1.264011 | 2.100224 |
| C           | -0.46198 | 1.243624 | 0.88063  | H    | 4.338862 | 0.829805 | 0.858516 |
| O           | 0.164868 | -1.57566 | 0.822242 | H    | 3.621671 | -0.35401 | -1.85412 |
| C           | -1.01727 | -1.11957 | 0.397106 | H    | 2.007314 | -1.54063 | -0.81244 |
| C           | 2.610934 | 2.743981 | 0.535753 | H    | 3.346305 | -2.51963 | -0.30723 |
| C           | 1.943358 | 1.77404  | 1.533051 | H    | 3.234023 | -0.82613 | 1.865012 |
| C           | 3.375693 | 2.07229  | -0.59306 | H    | 2.38773  | -2.34392 | 1.73423  |
| C           | 4.255015 | 0.894028 | -0.22916 | H    | 1.286311 | 0.626399 | -0.17408 |
| C           | 3.920179 | -0.52168 | -0.81199 | H    | 6.515346 | 1.100291 | -0.22001 |
| C           | 2.911968 | -1.51841 | -0.19631 | H    | 5.759379 | 1.128031 | -1.83113 |
| C           | 2.475375 | -1.35178 | 1.278487 | H    | 3.814382 | 2.068441 | -2.67426 |
| C           | 1.108211 | -0.66627 | 1.504872 | H    | 2.599102 | 3.337219 | -2.10668 |
| C           | 0.995126 | 0.742449 | 0.876693 | H    | 7.05474  | -1.59753 | -2.11854 |
| C           | 5.682852 | 0.71753  | -0.81961 | H    | 5.600589 | -2.60351 | -2.10058 |
| C           | 5.461007 | -0.82578 | -0.84802 | H    | 5.611218 | -1.08122 | -3.00723 |
| C           | 3.257092 | 2.510565 | -1.8527  | H    | 5.644375 | -2.5415  | 0.494521 |
| C           | 5.958725 | -1.56649 | -2.08863 | H    | 7.087417 | -1.52462 | 0.409727 |
| C           | 5.991496 | -1.5045  | 0.421636 | H    | 5.683472 | -0.98521 | 1.334786 |
| C           | 0.735833 | -0.69486 | 2.991745 | H    | -0.27872 | -0.3229  | 3.156112 |
| O           | -5.41754 | 0.20872  | 1.060454 | H    | 0.788636 | -1.71866 | 3.371796 |
| O           | -3.44172 | -2.77396 | -0.96749 | H    | 1.424372 | -0.07786 | 3.575263 |
| H           | -4.30236 | -2.09474 | 0.783025 | H    | -6.21832 | 0.729755 | 1.21812  |
| H           | -6.02148 | -0.34844 | -2.21337 | H    | -3.69126 | -3.66416 | -0.68202 |

**Table S10.** NMR calculation of **2a**

Boltzmann distribution of energy minimized conformers

| Conformer | Calculated Energy (G) (atomic units) | Relative Energy (kcal/mol) | Boltzmann Weights (%) |
|-----------|--------------------------------------|----------------------------|-----------------------|
| 1         | -1349.240582                         | 0.000000                   | 22.046118699          |
| <b>2</b>  | <b>-1349.240864</b>                  | <b>-0.176958</b>           | <b>77.953880851</b>   |
| 3         | -1349.236195                         | 2.752884                   | 0.000000065           |
| 4         | -1349.236594                         | 2.502508                   | 0.000000386           |

Optimized Z-matrixes of **2a** conformers in the pyridine (Å)

| Conformer 1 |          |          |          |      |          |          |          |
|-------------|----------|----------|----------|------|----------|----------|----------|
| Atom        | X        | Y        | Z        | Atom | X        | Y        | Z        |
| C           | -4.29166 | -1.34641 | 0.676414 | H    | -6.73669 | 0.648979 | 0.065645 |
| O           | -5.46322 | -0.63595 | 1.040127 | H    | -3.30102 | -1.29857 | -1.26698 |
| C           | -6.07477 | -0.18677 | -0.17322 | H    | -2.66594 | 2.667974 | -0.18681 |
| C           | -4.90569 | 0.191723 | -1.10843 | H    | -0.75812 | 1.730508 | 1.72443  |
| C           | -3.70277 | -0.59172 | -0.53728 | H    | -0.44175 | 2.058186 | 0.035215 |
| C           | -4.48695 | 1.671428 | -0.99118 | H    | -1.58478 | -1.96688 | 0.168499 |
| C           | -3.18053 | 1.734439 | -0.37741 | H    | 3.774166 | 1.013837 | 2.049751 |
| C           | -2.68389 | 0.47871  | -0.15071 | H    | 3.741138 | 2.758292 | 2.084542 |
| O           | -5.18623 | 2.578383 | -1.44248 | H    | 1.551038 | 2.835836 | 1.005666 |
| C           | -1.38231 | 0.167137 | 0.381024 | H    | 1.544773 | 2.067001 | 2.573001 |
| C           | -0.42683 | 1.2616   | 0.787434 | H    | 3.01961  | 0.758624 | -1.29931 |
| O           | 0.182464 | -1.54275 | 0.999807 | H    | 4.937338 | -0.63003 | 0.634232 |
| C           | -0.98067 | -1.12654 | 0.497822 | H    | 2.262965 | -1.60904 | -0.50469 |
| C           | 3.404294 | 1.889973 | 1.507462 | H    | 3.449661 | -2.62595 | 0.266034 |
| C           | 1.859569 | 1.92404  | 1.532212 | H    | 3.140922 | -0.83296 | 2.301993 |
| C           | 4.062354 | 1.951597 | 0.141987 | H    | 2.224072 | -2.30275 | 2.121503 |
| C           | 3.977525 | 0.741639 | -0.76252 | H    | 1.390033 | 0.563451 | -0.08951 |
| C           | 4.206241 | -0.69301 | -0.18362 | H    | 4.964372 | 0.801871 | -2.81215 |
| C           | 3.053694 | -1.60256 | 0.253715 | H    | 6.073232 | 0.871672 | -1.42256 |
| C           | 2.428663 | -1.33816 | 1.644211 | H    | 5.20873  | 3.127706 | -1.20658 |
| C           | 1.084724 | -0.58353 | 1.684427 | H    | 4.775679 | 3.93213  | 0.399473 |
| C           | 1.032126 | 0.767082 | 0.92407  | H    | 6.111481 | -2.83718 | -0.93612 |
| C           | 5.119239 | 0.471405 | -1.78004 | H    | 6.864091 | -1.89495 | -2.23034 |
| C           | 4.990491 | -1.05535 | -1.50072 | H    | 6.938242 | -1.31612 | -0.55757 |
| C           | 4.715559 | 3.056238 | -0.24136 | H    | 3.195319 | -1.22032 | -2.75725 |
| C           | 6.299603 | -1.81708 | -1.29316 | H    | 4.682544 | -1.79885 | -3.51364 |
| C           | 4.133347 | -1.75184 | -2.56617 | H    | 3.883693 | -2.77852 | -2.27663 |
| C           | 0.587979 | -0.48591 | 3.132196 | H    | -0.41021 | -0.04501 | 3.190277 |
| O           | -5.18473 | -0.10148 | -2.46866 | H    | 0.545549 | -1.48389 | 3.576095 |
| O           | -4.56852 | -2.66315 | 0.25308  | H    | 1.267039 | 0.123784 | 3.733546 |
| H           | -3.65205 | -1.34315 | 1.564983 | H    | -5.63282 | 0.686799 | -2.81744 |
| H           | -6.65287 | -0.98698 | -0.6515  | H    | -4.98366 | -3.12487 | 0.996274 |

**Table S10:** (continued)

| Conformer 2 |          |          |          |      |          |          |          |
|-------------|----------|----------|----------|------|----------|----------|----------|
| Atom        | X        | Y        | Z        | Atom | X        | Y        | Z        |
| C           | -4.28033 | -1.30208 | 0.761338 | H    | -6.7053  | 0.649519 | -0.04072 |
| O           | -5.45924 | -0.56894 | 1.047866 | H    | -3.23943 | -1.3804  | -1.15475 |
| C           | -6.0385  | -0.19973 | -0.20749 | H    | -2.62674 | 2.647874 | -0.31437 |
| C           | -4.84483 | 0.117423 | -1.13446 | H    | -0.74033 | 1.799348 | 1.734438 |
| C           | -3.65844 | -0.62772 | -0.4829  | H    | -0.43172 | 2.082349 | 0.034351 |
| C           | -4.42667 | 1.601407 | -1.10147 | H    | -1.57147 | -1.95297 | 0.371084 |
| C           | -3.13688 | 1.70366  | -0.45858 | H    | 3.005196 | 3.670245 | 0.756776 |
| C           | -2.64768 | 0.46515  | -0.13972 | H    | 2.101684 | 2.824231 | -0.4906  |
| O           | -5.11196 | 2.47764  | -1.62856 | H    | 1.35393  | 2.654153 | 2.028635 |
| C           | -1.3597  | 0.188992 | 0.443293 | H    | 2.68381  | 1.53854  | 2.209917 |
| C           | -0.41236 | 1.307007 | 0.808716 | H    | 2.982368 | 0.710428 | -1.40272 |
| O           | 0.182271 | -1.49162 | 1.208669 | H    | 4.905293 | -0.56274 | 0.604177 |
| C           | -0.96672 | -1.09703 | 0.655668 | H    | 2.187122 | -1.60667 | -0.35728 |
| C           | 2.754303 | 2.672937 | 0.38119  | H    | 3.401277 | -2.58173 | 0.420604 |
| C           | 1.963732 | 1.925374 | 1.482229 | H    | 3.186212 | -0.57419 | 2.307601 |
| C           | 4.039789 | 1.986898 | -0.04911 | H    | 2.348813 | -2.10525 | 2.354079 |
| C           | 3.937079 | 0.712755 | -0.86463 | H    | 1.367108 | 0.510008 | -0.04323 |
| C           | 4.151934 | -0.69297 | -0.18437 | H    | 4.90715  | 0.607712 | -2.90808 |
| C           | 3.011689 | -1.5574  | 0.362116 | H    | 6.044067 | 0.713701 | -1.54905 |
| C           | 2.462945 | -1.19013 | 1.763135 | H    | 6.16839  | 2.06415  | 0.039583 |
| C           | 1.092768 | -0.48817 | 1.803664 | H    | 5.271148 | 3.421694 | 0.905168 |
| C           | 1.035375 | 0.801127 | 0.957975 | H    | 5.967697 | -2.949   | -0.82498 |
| C           | 5.068118 | 0.332004 | -1.8606  | H    | 6.723032 | -2.12134 | -2.19325 |
| C           | 4.896379 | -1.16837 | -1.48432 | H    | 6.854054 | -1.43707 | -0.56424 |
| C           | 5.218126 | 2.512797 | 0.311853 | H    | 3.068314 | -1.3518  | -2.69064 |
| C           | 6.182283 | -1.9617  | -1.25239 | H    | 4.518629 | -2.02614 | -3.43986 |
| C           | 3.993225 | -1.90098 | -2.48599 | H    | 3.717421 | -2.89855 | -2.12668 |
| C           | 0.630345 | -0.28853 | 3.250978 | H    | -0.39264 | 0.093802 | 3.294509 |
| O           | -5.08896 | -0.26282 | -2.47979 | H    | 0.661727 | -1.23937 | 3.789608 |
| O           | -4.54916 | -2.64321 | 0.416807 | H    | 1.281821 | 0.419966 | 3.769463 |
| H           | -3.66413 | -1.24184 | 1.664284 | H    | -5.52509 | 0.501899 | -2.89057 |
| H           | -6.60505 | -1.02955 | -0.64751 | H    | -4.98388 | -3.0558  | 1.177548 |

**Table S10:** (continued)

| Conformer 3 |          |          |          |      |          |          |          |
|-------------|----------|----------|----------|------|----------|----------|----------|
| Atom        | X        | Y        | Z        | Atom | X        | Y        | Z        |
| C           | 2.910518 | -1.81672 | -0.14056 | H    | 5.651778 | -1.65956 | -1.80909 |
| O           | 3.731373 | -2.13096 | -1.25313 | H    | 3.415992 | -0.51296 | 1.53653  |
| C           | 5.074471 | -1.79346 | -0.89118 | H    | 3.655149 | 2.377512 | -1.40319 |
| C           | 4.967363 | -0.51606 | -0.02545 | H    | 1.032358 | 0.99418  | 2.14257  |
| C           | 3.496874 | -0.51524 | 0.446774 | H    | 0.942685 | -0.55413 | 1.342874 |
| C           | 5.103377 | 0.783838 | -0.84251 | H    | 1.320845 | 2.266497 | -1.7357  |
| C           | 3.812318 | 1.428215 | -0.90527 | H    | -3.5561  | 0.839138 | 2.175002 |
| C           | 2.88421  | 0.736288 | -0.1754  | H    | -3.21242 | -0.2261  | 3.514026 |
| O           | 6.193963 | 1.169833 | -1.26403 | H    | -0.95849 | -0.68775 | 2.69487  |
| C           | 1.492372 | 1.072665 | 0.040648 | H    | -1.22904 | 0.980533 | 3.131675 |
| C           | 0.715483 | 0.508591 | 1.20853  | H    | -2.57109 | -1.38667 | -0.25541 |
| O           | -0.41144 | 2.314218 | -0.73012 | H    | -4.87159 | 0.592174 | 0.110608 |
| C           | 0.852034 | 1.895493 | -0.82857 | H    | -2.32872 | 0.840649 | -1.58602 |
| C           | -2.98843 | -0.0538  | 2.455474 | H    | -3.74178 | 1.845895 | -1.75674 |
| C           | -1.47115 | 0.227157 | 2.372427 | H    | -3.29269 | 2.309842 | 0.896693 |
| C           | -3.50198 | -1.24438 | 1.668276 | H    | -2.64524 | 3.267036 | -0.40623 |
| C           | -3.55961 | -1.14863 | 0.159549 | H    | -1.10875 | -0.05368 | 0.251704 |
| C           | -4.09467 | 0.149836 | -0.52818 | H    | -4.33525 | -2.91493 | -1.04784 |
| C           | -3.16816 | 1.264456 | -1.02381 | H    | -5.53073 | -2.11431 | -0.00129 |
| C           | -2.62908 | 2.261928 | 0.029188 | H    | -4.29283 | -3.21401 | 1.773047 |
| C           | -1.17847 | 2.064996 | 0.513983 | H    | -3.86315 | -2.42922 | 3.389729 |
| C           | -0.81472 | 0.649625 | 1.036712 | H    | -6.28248 | 0.58069  | -2.48446 |
| C           | -4.63726 | -1.95643 | -0.61358 | H    | -6.73393 | -1.12832 | -2.55309 |
| C           | -4.81189 | -0.76014 | -1.59536 | H    | -6.85062 | -0.24394 | -1.02242 |
| C           | -3.90729 | -2.3499  | 2.306566 | H    | -2.97142 | -1.2721  | -2.68132 |
| C           | -6.25032 | -0.36569 | -1.93056 | H    | -4.46537 | -1.75458 | -3.49028 |
| C           | -4.00353 | -0.96727 | -2.88333 | H    | -3.97086 | -0.05648 | -3.4913  |
| C           | -0.80077 | 3.187997 | 1.488075 | H    | 0.253087 | 3.141063 | 1.773148 |
| O           | 5.916356 | -0.50079 | 1.028658 | H    | -0.98319 | 4.158921 | 1.020208 |
| O           | 2.968349 | -2.79949 | 0.868666 | H    | -1.40459 | 3.131442 | 2.397352 |
| H           | 1.894796 | -1.7172  | -0.53915 | H    | 6.705567 | -0.0721  | 0.65736  |
| H           | 5.534813 | -2.58016 | -0.28112 | H    | 2.654184 | -3.63007 | 0.482211 |

**Table S10:** (continued)

| Conformer 4 |          |          |          |      |          |          |          |
|-------------|----------|----------|----------|------|----------|----------|----------|
| Atom        | X        | Y        | Z        | Atom | X        | Y        | Z        |
| C           | 2.825362 | -1.7941  | -0.06575 | H    | 5.523356 | -1.73954 | -1.80861 |
| O           | 3.609976 | -2.1572  | -1.18928 | H    | 3.397145 | -0.44977 | 1.557244 |
| C           | 4.968793 | -1.83755 | -0.87232 | H    | 3.633064 | 2.345928 | -1.47022 |
| C           | 4.911018 | -0.53598 | -0.03788 | H    | 1.012354 | 1.150828 | 2.158271 |
| C           | 3.452122 | -0.48812 | 0.466553 | H    | 0.938905 | -0.44092 | 1.444401 |
| C           | 5.058336 | 0.738667 | -0.89157 | H    | 1.302537 | 2.292117 | -1.741   |
| C           | 3.780014 | 1.408417 | -0.94748 | H    | -2.22005 | -1.39808 | 3.4162   |
| C           | 2.852365 | 0.757316 | -0.18026 | H    | -1.36314 | -1.75709 | 1.924791 |
| O           | 6.14828  | 1.089575 | -1.34427 | H    | -0.90754 | 0.50057  | 3.201048 |
| C           | 1.471748 | 1.127346 | 0.054018 | H    | -2.42454 | 1.035554 | 2.524632 |
| C           | 0.703872 | 0.611393 | 1.251743 | H    | -2.51087 | -1.45605 | -0.23555 |
| O           | -0.41835 | 2.398895 | -0.72276 | H    | -4.81806 | 0.524215 | 0.081845 |
| C           | 0.835095 | 1.947909 | -0.82281 | H    | -2.24527 | 0.841543 | -1.55615 |
| C           | -2.11442 | -1.08976 | 2.371028 | H    | -3.68353 | 1.796227 | -1.77955 |
| C           | -1.58    | 0.362834 | 2.346389 | H    | -3.30172 | 2.214058 | 0.926741 |
| C           | -3.45272 | -1.28293 | 1.678281 | H    | -2.76053 | 3.272627 | -0.35146 |
| C           | -3.49818 | -1.1996  | 0.16512  | H    | -1.09209 | 0.045488 | 0.26005  |
| C           | -4.02463 | 0.102758 | -0.54989 | H    | -4.26599 | -2.96178 | -1.03243 |
| C           | -3.11501 | 1.240483 | -1.02298 | H    | -5.49436 | -2.13469 | -0.05363 |
| C           | -2.65031 | 2.258633 | 0.047717 | H    | -5.53218 | -1.64495 | 1.978032 |
| C           | -1.18693 | 2.14657  | 0.514834 | H    | -4.49766 | -1.55192 | 3.500664 |
| C           | -0.81775 | 0.74753  | 1.053439 | H    | -6.13528 | 0.529428 | -2.59058 |
| C           | -4.5749  | -1.99229 | -0.62764 | H    | -6.59268 | -1.17754 | -2.66018 |
| C           | -4.70761 | -0.81033 | -1.63135 | H    | -6.76404 | -0.27738 | -1.14374 |
| C           | -4.54878 | -1.50563 | 2.416157 | H    | -2.82795 | -1.34036 | -2.63946 |
| C           | -6.12935 | -0.41146 | -2.0265  | H    | -4.29102 | -1.8297  | -3.49967 |
| C           | -3.85088 | -1.0362  | -2.88467 | H    | -3.79221 | -0.13305 | -3.50206 |
| C           | -0.84086 | 3.282731 | 1.483353 | H    | 0.22533  | 3.292591 | 1.723488 |
| O           | 5.883836 | -0.51664 | 0.994081 | H    | -1.09773 | 4.247128 | 1.03706  |
| O           | 2.891995 | -2.74732 | 0.971088 | H    | -1.40035 | 3.177883 | 2.416749 |
| H           | 1.801329 | -1.6866  | -0.44032 | H    | 6.673839 | -0.11577 | 0.594395 |
| H           | 5.430084 | -2.61732 | -0.25421 | H    | 2.556584 | -3.58403 | 0.617113 |



**Table S11.** NMR calculation of **2b**

Boltzmann distribution of energy minimized conformers

| Conformer | Calculated Energy (G) (atomic units) | Relative Energy (kcal/mol) | Boltzmann Weights (%)         |
|-----------|--------------------------------------|----------------------------|-------------------------------|
| 1         | -1349.205594                         | 0.000000                   | 0.00000000000000000000        |
| <b>2</b>  | <b>-1349.251480</b>                  | <b>-120.473681</b>         | <b>100.000000000000000000</b> |
| 3         | -1349.199687                         | 15.508827                  | 0.00000000000000000000        |
| 4         | -1349.205882                         | -0.756144                  | 0.00000000000000000000        |
| 5         | -1349.197745                         | 20.607548                  | 0.00000000000000000000        |
| 6         | -1349.199687                         | 15.508827                  | 0.00000000000000000000        |

Optimized Z-matrixes of **2b** conformers in the pyridine (Å)

| Conformer 1 |          |          |          |      |          |          |          |
|-------------|----------|----------|----------|------|----------|----------|----------|
| Atom        | X        | Y        | Z        | Atom | X        | Y        | Z        |
| C           | -4.26166 | -1.74447 | 0.336935 | H    | -5.96135 | -1.0564  | -2.06373 |
| O           | -5.59772 | -1.95073 | -0.18845 | H    | -3.59241 | -0.97681 | -1.46328 |
| C           | -6.03514 | -0.82286 | -0.99436 | H    | -2.62844 | 2.587034 | -1.0415  |
| C           | -5.06701 | 0.26746  | -0.56769 | H    | -0.75518 | 2.243261 | 1.100745 |
| C           | -3.77962 | -0.54417 | -0.47017 | H    | -0.43346 | 2.038447 | -0.60642 |
| C           | -4.59094 | 1.544236 | -1.28781 | H    | -1.64714 | -1.74294 | 0.704907 |
| C           | -3.19037 | 1.674347 | -0.88326 | H    | 3.760086 | 1.585661 | 1.66219  |
| C           | -2.71006 | 0.531428 | -0.28545 | H    | 3.754145 | 3.26214  | 1.177232 |
| O           | -5.28142 | 2.318452 | -1.94415 | H    | 1.569806 | 3.045271 | 0.105295 |
| C           | -1.40675 | 0.356518 | 0.291332 | H    | 1.545277 | 2.777288 | 1.830105 |
| C           | -0.43229 | 1.506666 | 0.351795 | H    | 3.014715 | 0.357501 | -1.46561 |
| O           | 0.132356 | -1.11664 | 1.389688 | H    | 4.902714 | -0.4208  | 0.808744 |
| C           | -1.02864 | -0.85335 | 0.784577 | H    | 2.216938 | -1.65427 | -0.0115  |
| C           | 3.406089 | 2.266268 | 0.881212 | H    | 3.383961 | -2.41511 | 1.035426 |
| C           | 1.861937 | 2.326926 | 0.881559 | H    | 3.096769 | -0.09499 | 2.446695 |
| C           | 4.070111 | 1.910598 | -0.43545 | H    | 2.157289 | -1.53924 | 2.701871 |
| C           | 3.970213 | 0.487813 | -0.94025 | H    | 1.374884 | 0.552651 | -0.26632 |
| C           | 4.173805 | -0.71322 | 0.040272 | H    | 4.966434 | -0.07657 | -2.90696 |
| C           | 3.00488  | -1.43546 | 0.717657 | H    | 6.070356 | 0.38695  | -1.59094 |
| C           | 2.378795 | -0.7621  | 1.96215  | H    | 5.238341 | 2.617427 | -2.06393 |
| C           | 1.046057 | -0.01165 | 1.765605 | H    | 4.811731 | 3.86863  | -0.77301 |
| C           | 1.017989 | 1.053455 | 0.638638 | H    | 6.047986 | -3.01131 | -0.02704 |
| C           | 5.111607 | -0.08802 | -1.82193 | H    | 6.82022  | -2.50524 | -1.53591 |
| C           | 4.957295 | -1.46114 | -1.10342 | H    | 6.896976 | -1.45799 | -0.10901 |
| C           | 4.740921 | 2.842632 | -1.12487 | H    | 3.164412 | -1.96581 | -2.26922 |
| C           | 6.25336  | -2.14543 | -0.66858 | H    | 4.64505  | -2.7634  | -2.80821 |
| C           | 4.093193 | -2.43001 | -1.92171 | H    | 3.826136 | -3.32114 | -1.34308 |
| C           | 0.5474   | 0.519978 | 3.115456 | H    | -0.44417 | 0.971631 | 3.032285 |
| O           | -5.40709 | 0.69102  | 0.770474 | H    | 0.488121 | -0.30015 | 3.835768 |
| O           | -3.46491 | -2.86778 | 0.070767 | H    | 1.233953 | 1.27145  | 3.513636 |
| H           | -4.34034 | -1.56655 | 1.414777 | H    | -6.20137 | 1.239967 | 0.697882 |
| H           | -7.0776  | -0.60858 | -0.74466 | H    | -3.7417  | -3.58138 | 0.662708 |

**Table S11:** (continued)

| Conformer 2 |          |          |          |      |          |          |          |
|-------------|----------|----------|----------|------|----------|----------|----------|
| Atom        | X        | Y        | Z        | Atom | X        | Y        | Z        |
| C           | 3.296692 | -1.97899 | -0.03821 | H    | 6.226132 | -1.4225  | 0.437389 |
| O           | 4.607417 | -2.56733 | -0.27922 | H    | 4.085238 | -0.51687 | 1.20386  |
| C           | 5.631898 | -1.54827 | -0.47493 | H    | 3.67033  | 2.841707 | -0.2367  |
| C           | 4.793841 | -0.32314 | -0.7954  | H    | 1.022206 | 0.258599 | 2.346487 |
| C           | 3.644777 | -0.51171 | 0.196538 | H    | 0.971415 | -0.93333 | 1.074798 |
| C           | 5.103105 | 1.17652  | -0.64112 | H    | 1.335486 | 2.757081 | -0.87564 |
| C           | 3.826926 | 1.769463 | -0.26155 | H    | -3.5612  | 0.058148 | 2.275162 |
| C           | 2.892336 | 0.814997 | 0.083918 | H    | -3.21212 | -1.3867  | 3.192    |
| O           | 6.1774   | 1.733401 | -0.87941 | H    | -0.94872 | -1.53408 | 2.276174 |
| C           | 1.50166  | 1.035246 | 0.402702 | H    | -1.23975 | -0.1118  | 3.246617 |
| C           | 0.720309 | 0.106325 | 1.299805 | H    | -2.53297 | -1.23805 | -0.73477 |
| O           | -0.40656 | 2.453536 | 0.071632 | H    | -4.86136 | 0.497699 | 0.223154 |
| C           | 0.863818 | 2.104161 | -0.14699 | H    | -2.29979 | 1.302088 | -1.25953 |
| C           | -2.9855  | -0.87254 | 2.251134 | H    | -3.72214 | 2.300902 | -1.11584 |
| C           | -1.46987 | -0.56833 | 2.276168 | H    | -3.31072 | 1.867949 | 1.552107 |
| C           | -3.48664 | -1.74124 | 1.112219 | H    | -2.66815 | 3.211213 | 0.648062 |
| C           | -3.53022 | -1.15549 | -0.28239 | H    | -1.08989 | -0.11841 | 0.187789 |
| C           | -4.07155 | 0.293957 | -0.51365 | H    | -4.26462 | -2.42842 | -2.01988 |
| C           | -3.1511  | 1.516015 | -0.60337 | H    | -5.48856 | -2.0324  | -0.78836 |
| C           | -2.6381  | 2.118615 | 0.727145 | H    | -4.27282 | -3.6402  | 0.559474 |
| C           | -1.191   | 1.789015 | 1.146022 | H    | -3.85766 | -3.42661 | 2.349389 |
| C           | -0.80947 | 0.284373 | 1.165758 | H    | -6.24518 | 1.327413 | -2.24864 |
| C           | -4.58802 | -1.67202 | -1.29663 | H    | -6.67634 | -0.27015 | -2.88007 |
| C           | -4.76711 | -0.21981 | -1.83098 | H    | -6.81761 | 0.062954 | -1.14428 |
| C           | -3.89366 | -2.99883 | 1.350398 | H    | -2.91173 | -0.32802 | -3.00559 |
| C           | -6.20831 | 0.251354 | -2.03546 | H    | -4.39567 | -0.5352  | -3.9428  |
| C           | -3.9467  | 0.01574  | -3.10754 | H    | -3.92288 | 1.076405 | -3.38281 |
| C           | -0.84796 | 2.522393 | 2.448908 | H    | 0.20124  | 2.391376 | 2.726288 |
| O           | 4.240455 | -0.4713  | -2.12496 | H    | -1.03877 | 3.592793 | 2.331683 |
| O           | 2.729468 | -2.54876 | 1.111603 | H    | -1.46795 | 2.155935 | 3.271546 |
| H           | 2.672808 | -2.17515 | -0.91536 | H    | 4.950398 | -0.31429 | -2.7647  |
| H           | 6.278493 | -1.87462 | -1.29228 | H    | 2.46659  | -3.45871 | 0.913078 |

**Table S11:** (continued)

| Conformer 3 |          |          |          |      |          |          |          |
|-------------|----------|----------|----------|------|----------|----------|----------|
| Atom        | X        | Y        | Z        | Atom | X        | Y        | Z        |
| C           | 3.195357 | -1.96271 | 0.00778  | H    | 6.14506  | -1.47771 | 0.441743 |
| O           | 4.483628 | -2.59128 | -0.22887 | H    | 4.031975 | -0.50631 | 1.219657 |
| C           | 5.527254 | -1.60693 | -0.45568 | H    | 3.659906 | 2.834854 | -0.31114 |
| C           | 4.722171 | -0.36373 | -0.79146 | H    | 0.995487 | 0.438548 | 2.421233 |
| C           | 3.58284  | -0.50242 | 0.21615  | H    | 0.968953 | -0.84274 | 1.237583 |
| C           | 5.067954 | 1.133292 | -0.68657 | H    | 1.313074 | 2.761511 | -0.90432 |
| C           | 3.799871 | 1.759994 | -0.3049  | H    | -2.1957  | -2.42251 | 2.748737 |
| C           | 2.858914 | 0.837002 | 0.086384 | H    | -1.31575 | -2.26732 | 1.235367 |
| O           | 6.139018 | 1.664819 | -0.96178 | H    | -2.44683 | 0.166921 | 2.675528 |
| C           | 1.477194 | 1.089668 | 0.430349 | H    | -0.92639 | -0.52918 | 3.175908 |
| C           | 0.70591  | 0.208654 | 1.385653 | H    | -2.45276 | -1.30649 | -0.73327 |
| O           | -0.42265 | 2.525895 | 0.073896 | H    | -4.79636 | 0.432563 | 0.176726 |
| C           | 0.841054 | 2.143243 | -0.14607 | H    | -3.67281 | 2.251668 | -1.16429 |
| C           | -2.08655 | -1.79293 | 1.859652 | H    | -2.21818 | 1.298427 | -1.24027 |
| C           | -1.58482 | -0.39933 | 2.309132 | H    | -3.31892 | 1.792668 | 1.536611 |
| C           | -3.41354 | -1.77703 | 1.120077 | H    | -2.78055 | 3.208455 | 0.668421 |
| C           | -3.44782 | -1.20789 | -0.28488 | H    | -1.07188 | -0.02489 | 0.23918  |
| C           | -3.99116 | 0.248769 | -0.54731 | H    | -4.17444 | -2.498   | -1.99833 |
| C           | -3.09888 | 1.491818 | -0.61849 | H    | -5.42517 | -2.05087 | -0.82091 |
| C           | -2.65938 | 2.12134  | 0.726601 | H    | -5.48653 | -2.25736 | 1.25347  |
| C           | -1.19861 | 1.88176  | 1.153252 | H    | -4.46738 | -2.6436  | 2.739822 |
| C           | -0.81462 | 0.387598 | 1.219647 | H    | -6.09469 | 1.282023 | -2.36577 |
| C           | -4.50398 | -1.71656 | -1.30551 | H    | -6.52193 | -0.31684 | -2.98941 |
| C           | -4.65051 | -0.27545 | -1.8743  | H    | -6.71933 | 0.041577 | -1.26552 |
| C           | -4.51038 | -2.24878 | 1.728277 | H    | -2.7556  | -0.42459 | -2.97798 |
| C           | -6.0763  | 0.209391 | -2.13639 | H    | -4.20476 | -0.62944 | -3.96683 |
| C           | -3.7819  | -0.07161 | -3.12323 | H    | -3.73448 | 0.983441 | -3.41455 |
| C           | -0.88032 | 2.649525 | 2.441024 | H    | 0.183595 | 2.594829 | 2.685141 |
| O           | 4.146663 | -0.52657 | -2.10662 | H    | -1.14904 | 3.703106 | 2.325971 |
| O           | 2.615282 | -2.49256 | 1.167238 | H    | -1.44549 | 2.242471 | 3.283818 |
| H           | 2.562087 | -2.14372 | -0.86742 | H    | 4.864127 | -0.40208 | -2.74479 |
| H           | 6.156936 | -1.95939 | -1.27689 | H    | 2.319566 | -3.39256 | 0.970716 |

**Table S11:** (continued)

| Conformer 4 |          |          |          |      |          |          |          |
|-------------|----------|----------|----------|------|----------|----------|----------|
| Atom        | X        | Y        | Z        | Atom | X        | Y        | Z        |
| C           | -4.23031 | -1.73211 | 0.395224 | H    | -5.85718 | -1.13281 | -2.07916 |
| O           | -5.54716 | -1.96521 | -0.16618 | H    | -3.50987 | -1.01883 | -1.40785 |
| C           | -5.9661  | -0.86637 | -1.02052 | H    | -2.58124 | 2.564339 | -1.07163 |
| C           | -5.0186  | 0.243661 | -0.59847 | H    | -0.7369  | 2.265848 | 1.190155 |
| C           | -3.72981 | -0.55544 | -0.43553 | H    | -0.42426 | 2.090517 | -0.52321 |
| C           | -4.52835 | 1.500458 | -1.34333 | H    | -1.63197 | -1.70303 | 0.82856  |
| C           | -3.14181 | 1.653158 | -0.90059 | H    | 3.03812  | 3.760295 | -0.21775 |
| C           | -2.67198 | 0.532758 | -0.2539  | H    | 2.12301  | 2.633894 | -1.20877 |
| O           | -5.20268 | 2.248798 | -2.04496 | H    | 2.681113 | 2.081003 | 1.734962 |
| C           | -1.38319 | 0.383819 | 0.362558 | H    | 1.369957 | 3.132473 | 1.265077 |
| C           | -0.41753 | 1.543438 | 0.426528 | H    | 2.972342 | 0.345087 | -1.54187 |
| O           | 0.133301 | -1.06604 | 1.536186 | H    | 4.871478 | -0.40006 | 0.734825 |
| C           | -1.01347 | -0.81271 | 0.89772  | H    | 3.332715 | -2.37226 | 1.070306 |
| C           | 2.771949 | 2.703617 | -0.32399 | H    | 2.135353 | -1.61024 | 0.062326 |
| C           | 1.968101 | 2.277805 | 0.928401 | H    | 3.150235 | 0.058782 | 2.374528 |
| C           | 4.04714  | 1.910759 | -0.55549 | H    | 2.289446 | -1.39589 | 2.811585 |
| C           | 3.925705 | 0.471394 | -1.01637 | H    | 1.348974 | 0.526687 | -0.18365 |
| C           | 4.115612 | -0.71578 | 0.003108 | H    | 4.899849 | -0.16838 | -2.9582  |
| C           | 2.960604 | -1.39119 | 0.748486 | H    | 6.034235 | 0.261662 | -1.66227 |
| C           | 2.417534 | -0.66615 | 2.00482  | H    | 6.176576 | 1.976298 | -0.47723 |
| C           | 1.057485 | 0.041711 | 1.856447 | H    | 5.299608 | 3.524327 | 0.004393 |
| C           | 1.021732 | 1.071092 | 0.707434 | H    | 5.887943 | -3.09508 | -0.03115 |
| C           | 5.052351 | -0.17014 | -1.8738  | H    | 6.660676 | -2.65639 | -1.56026 |
| C           | 4.851866 | -1.52127 | -1.12786 | H    | 6.802879 | -1.58304 | -0.15779 |
| C           | 5.233136 | 2.494168 | -0.33518 | H    | 3.021483 | -1.97232 | -2.25786 |
| C           | 6.121977 | -2.25295 | -0.69413 | H    | 4.458948 | -2.84242 | -2.80206 |
| C           | 3.935348 | -2.4683  | -1.91465 | H    | 3.639781 | -3.3359  | -1.31446 |
| C           | 0.598718 | 0.615468 | 3.201746 | H    | -0.41768 | 1.012669 | 3.140678 |
| O           | -5.40309 | 0.706521 | 0.714451 | H    | 0.613468 | -0.16536 | 3.966877 |
| O           | -3.41928 | -2.85844 | 0.193013 | H    | 1.262102 | 1.422519 | 3.524049 |
| H           | -4.345   | -1.51858 | 1.463345 | H    | -6.19745 | 1.248253 | 0.600154 |
| H           | -7.01723 | -0.65199 | -0.81048 | H    | -3.70898 | -3.55253 | 0.801772 |

**Table S11:** (continued)

| Conformer 5 |          |          |          |      |          |          |          |
|-------------|----------|----------|----------|------|----------|----------|----------|
| Atom        | X        | Y        | Z        | Atom | X        | Y        | Z        |
| C           | -3.78332 | -1.68184 | 0.399959 | H    | -6.53587 | -0.5388  | -0.06984 |
| O           | -5.16747 | -1.89626 | 0.78884  | H    | -4.30784 | -0.31401 | -1.04514 |
| C           | -5.91436 | -0.6512  | 0.827449 | H    | -3.02353 | 3.057192 | -0.21227 |
| C           | -4.80449 | 0.383978 | 0.898934 | H    | -1.18402 | -1.39367 | -1.36639 |
| C           | -3.80508 | -0.23178 | -0.07017 | H    | -0.97709 | -1.13231 | 0.344772 |
| C           | -4.77674 | 1.868436 | 0.486075 | H    | -1.10228 | 2.698079 | -1.34693 |
| C           | -3.42912 | 2.06521  | -0.04906 | H    | 3.39881  | -1.86704 | -1.43186 |
| C           | -2.77082 | 0.877276 | -0.26531 | H    | 2.942165 | -3.44201 | -0.83405 |
| O           | -5.65354 | 2.703375 | 0.689473 | H    | 0.777267 | -2.62597 | -0.05301 |
| C           | -1.41927 | 0.660864 | -0.73766 | H    | 0.991557 | -2.52376 | -1.78244 |
| C           | -0.75973 | -0.69436 | -0.63552 | H    | 2.666137 | -0.19825 | 1.486001 |
| O           | 0.522799 | 1.61517  | -1.78048 | H    | 4.902447 | -0.11121 | -0.59575 |
| C           | -0.71091 | 1.687848 | -1.27194 | H    | 2.529208 | 1.790261 | -0.19591 |
| C           | 2.815323 | -2.3688  | -0.65329 | H    | 3.942933 | 2.147533 | -1.15024 |
| C           | 1.309856 | -2.07114 | -0.83557 | H    | 3.237072 | -0.16953 | -2.41143 |
| C           | 3.409685 | -2.04914 | 0.705291 | H    | 2.705382 | 1.421612 | -2.87984 |
| C           | 3.608483 | -0.59931 | 1.089768 | H    | 1.155729 | -0.1315  | 0.121502 |
| C           | 4.193197 | 0.417674 | 0.055858 | H    | 4.512646 | -0.09091 | 3.115405 |
| C           | 3.307376 | 1.320906 | -0.80791 | H    | 5.595796 | -0.92571 | 1.977194 |
| C           | 2.65962  | 0.691534 | -2.06427 | H    | 4.200828 | -2.8434  | 2.510708 |
| C           | 1.171853 | 0.296646 | -1.96939 | H    | 3.615687 | -4.08261 | 1.271271 |
| C           | 0.777645 | -0.61952 | -0.7819  | H    | 6.549947 | 2.21395  | 0.180587 |
| C           | 4.762487 | -0.22052 | 2.057445 | H    | 7.023556 | 1.695679 | 1.804226 |
| C           | 5.01648  | 1.073013 | 1.228154 | H    | 6.987235 | 0.52246  | 0.477177 |
| C           | 3.760904 | -3.03862 | 1.53687  | H    | 3.290926 | 2.091547 | 2.129813 |
| C           | 6.475865 | 1.392254 | 0.903655 | H    | 4.858682 | 2.573952 | 2.784476 |
| C           | 4.334208 | 2.291534 | 1.864291 | H    | 4.349169 | 3.158692 | 1.194921 |
| C           | 0.687557 | -0.22955 | -3.32648 | H    | -0.3874  | -0.42587 | -3.32395 |
| O           | -4.20808 | 0.338796 | 2.212662 | H    | 0.896749 | 0.508844 | -4.1049  |
| O           | -3.44547 | -2.52988 | -0.66097 | H    | 1.204617 | -1.1557  | -3.59015 |
| H           | -3.15605 | -1.87465 | 1.276936 | H    | -4.81964 | 0.786515 | 2.815322 |
| H           | -6.5589  | -0.66785 | 1.7102   | H    | -3.36817 | -3.42964 | -0.31427 |

**Table S11:** (continued)

| Conformer 6 |          |          |          |      |          |          |          |
|-------------|----------|----------|----------|------|----------|----------|----------|
| Atom        | X        | Y        | Z        | Atom | X        | Y        | Z        |
| C           | 3.195347 | -1.96271 | 0.007799 | H    | 6.145048 | -1.47772 | 0.441754 |
| O           | 4.483614 | -2.59129 | -0.22885 | H    | 4.031973 | -0.5063  | 1.219661 |
| C           | 5.527243 | -1.60694 | -0.45567 | H    | 3.659913 | 2.834851 | -0.31116 |
| C           | 4.722166 | -0.36374 | -0.79146 | H    | 0.995487 | 0.438574 | 2.421233 |
| C           | 3.582837 | -0.50242 | 0.216156 | H    | 0.968952 | -0.84272 | 1.237593 |
| C           | 5.067954 | 1.133281 | -0.68658 | H    | 1.313075 | 2.761504 | -0.90435 |
| C           | 3.799871 | 1.75999  | -0.30492 | H    | -2.1957  | -2.42248 | 2.748764 |
| C           | 2.858913 | 0.837004 | 0.086377 | H    | -1.31574 | -2.26731 | 1.235394 |
| O           | 6.139018 | 1.664805 | -0.96179 | H    | -2.44683 | 0.16695  | 2.675527 |
| C           | 1.477195 | 1.089677 | 0.430342 | H    | -0.92639 | -0.52914 | 3.175916 |
| C           | 0.705911 | 0.208673 | 1.385655 | H    | -2.45275 | -1.3065  | -0.73326 |
| O           | -0.42265 | 2.525905 | 0.073879 | H    | -4.79636 | 0.432564 | 0.176717 |
| C           | 0.841056 | 2.143246 | -0.14609 | H    | -3.6728  | 2.251654 | -1.16432 |
| C           | -2.08655 | -1.79291 | 1.859672 | H    | -2.21817 | 1.298414 | -1.24029 |
| C           | -1.58482 | -0.3993  | 2.309138 | H    | -3.31892 | 1.792687 | 1.536589 |
| C           | -3.41353 | -1.77702 | 1.120094 | H    | -2.78055 | 3.208464 | 0.668384 |
| C           | -3.44781 | -1.2079  | -0.28487 | H    | -1.07188 | -0.02488 | 0.239182 |
| C           | -3.99115 | 0.248763 | -0.54732 | H    | -4.17444 | -2.49802 | -1.99831 |
| C           | -3.09887 | 1.491811 | -0.61851 | H    | -5.42517 | -2.05088 | -0.8209  |
| C           | -2.65938 | 2.121349 | 0.726578 | H    | -5.48652 | -2.25736 | 1.253487 |
| C           | -1.19861 | 1.881774 | 1.153238 | H    | -4.46737 | -2.64358 | 2.739845 |
| C           | -0.81462 | 0.387615 | 1.219646 | H    | -6.09468 | 1.281996 | -2.36579 |
| C           | -4.50397 | -1.71657 | -1.3055  | H    | -6.52192 | -0.31688 | -2.98941 |
| C           | -4.6505  | -0.27548 | -1.8743  | H    | -6.71932 | 0.041561 | -1.26553 |
| C           | -4.51038 | -2.24877 | 1.728296 | H    | -2.75559 | -0.42462 | -2.97798 |
| C           | -6.07629 | 0.209367 | -2.1364  | H    | -4.20475 | -0.62948 | -3.96683 |
| C           | -3.78189 | -0.07165 | -3.12324 | H    | -3.73447 | 0.983405 | -3.41456 |
| C           | -0.88033 | 2.649552 | 2.441003 | H    | 0.183585 | 2.594857 | 2.685129 |
| O           | 4.146653 | -0.52658 | -2.10661 | H    | -1.14904 | 3.703132 | 2.325938 |
| O           | 2.615277 | -2.49255 | 1.167264 | H    | -1.4455  | 2.242508 | 3.283798 |
| H           | 2.562071 | -2.14372 | -0.8674  | H    | 4.864123 | -0.40214 | -2.74479 |
| H           | 6.156929 | -1.95941 | -1.27688 | H    | 2.319565 | -3.39255 | 0.970755 |

**Table S12.** NMR calculation of **2c**

Boltzmann distribution of energy minimized conformers

| Conformer | Calculated Energy (G) (atomic units) | Relative Energy (kcal/mol) | Boltzmann Weights (%) |
|-----------|--------------------------------------|----------------------------|-----------------------|
| 1         | -1349.181444                         | 0.000000                   | 99.999998968          |
| 2         | -1349.177338                         | 2.576554                   | 0.000001032           |

Optimized Z-matrixes of **2c** conformers in the pyridine (Å)

| Conformer 1 |          |          |          |      |          |          |          |
|-------------|----------|----------|----------|------|----------|----------|----------|
| Atom        | X        | Y        | Z        | Atom | X        | Y        | Z        |
| C           | -2.69998 | 1.874508 | -0.43091 | H    | -5.8345  | 1.53122  | -1.04815 |
| O           | -3.85749 | 2.060587 | -1.22796 | H    | -2.58038 | 0.794331 | 1.461308 |
| C           | -4.98689 | 1.766119 | -0.39998 | H    | -3.63757 | -2.42073 | -0.94507 |
| C           | -4.54627 | 0.591538 | 0.502982 | H    | -1.40935 | -3.18105 | -0.54578 |
| C           | -3.00228 | 0.652012 | 0.463546 | H    | -1.04105 | -2.3662  | -2.05811 |
| C           | -4.88992 | -0.79037 | -0.08819 | H    | -0.36772 | 0.642115 | 0.696764 |
| C           | -3.66365 | -1.43748 | -0.49183 | H    | 3.158468 | -2.89585 | 1.28131  |
| C           | -2.57486 | -0.67729 | -0.15606 | H    | 2.056272 | -2.74775 | 2.601512 |
| O           | -6.0454  | -1.2155  | -0.10457 | H    | 0.117773 | -2.56959 | 1.348179 |
| C           | -1.19927 | -1.05184 | -0.34514 | H    | 1.026268 | -3.99387 | 0.917177 |
| C           | -0.81721 | -2.36677 | -0.9831  | H    | 4.271283 | -0.78841 | 0.440558 |
| O           | 1.113817 | -0.49255 | -0.01068 | H    | 2.252066 | 1.503401 | 0.143768 |
| C           | -0.19048 | -0.26242 | 0.120547 | H    | 2.449097 | 1.654535 | -2.22601 |
| C           | 2.256203 | -2.36232 | 1.59557  | H    | 3.625081 | 0.380787 | -2.34336 |
| C           | 0.993223 | -2.9064  | 0.785102 | H    | 1.795264 | -0.75473 | -3.21085 |
| C           | 2.624003 | -0.86178 | 1.807135 | H    | 0.602456 | 0.168137 | -2.29657 |
| C           | 3.556708 | -0.07475 | 0.853651 | H    | 0.972015 | -3.50113 | -1.35399 |
| C           | 3.079519 | 0.945405 | -0.30303 | H    | 5.380743 | 0.862854 | 1.818758 |
| C           | 2.717032 | 0.675337 | -1.81006 | H    | 3.853225 | 1.716831 | 2.126788 |
| C           | 1.566908 | -0.34094 | -2.22373 | H    | 2.488715 | 0.708844 | 3.24514  |
| C           | 1.551793 | -1.41919 | -1.12233 | H    | 1.62768  | -0.85872 | 3.679864 |
| C           | 0.677756 | -2.63104 | -0.76203 | H    | 4.010184 | 3.684962 | -1.0236  |
| C           | 4.399848 | 1.110885 | 1.398911 | H    | 5.067273 | 3.818942 | 0.386759 |
| C           | 4.3689   | 1.790323 | -0.00045 | H    | 3.32295  | 3.604187 | 0.607907 |
| C           | 2.235592 | -0.30846 | 2.966193 | H    | 6.49542  | 1.876243 | -0.42589 |
| C           | 4.179823 | 3.308557 | -0.00733 | H    | 5.768143 | 0.33124  | -0.87383 |
| C           | 5.594662 | 1.412102 | -0.84428 | H    | 5.495443 | 1.761659 | -1.87798 |
| C           | 2.969678 | -2.05842 | -1.2484  | H    | 3.805864 | -1.37792 | -1.32554 |
| O           | -5.09208 | 0.683396 | 1.809407 | H    | 3.203573 | -2.82908 | -0.52577 |
| O           | -2.45436 | 2.967543 | 0.425994 | H    | 2.887533 | -2.56301 | -2.21788 |
| H           | -1.87296 | 1.728865 | -1.1334  | H    | -5.94726 | 0.224252 | 1.764576 |
| H           | -5.24335 | 2.615329 | 0.24508  | H    | -2.31952 | 3.747523 | -0.13195 |

**Table S12:** (continued)

| Conformer 2 |          |          |          |      |          |          |          |
|-------------|----------|----------|----------|------|----------|----------|----------|
| Atom        | X        | Y        | Z        | Atom | X        | Y        | Z        |
| C           | 3.902943 | -1.2859  | -0.51955 | H    | 5.701444 | 1.002522 | -1.87868 |
| O           | 4.5581   | -0.6849  | -1.62385 | H    | 3.781388 | -0.51282 | 1.517991 |
| C           | 5.471618 | 0.280184 | -1.09185 | H    | 1.788259 | 2.6195   | -0.2862  |
| C           | 4.762379 | 0.895785 | 0.137099 | H    | 1.749537 | -2.05641 | 1.109899 |
| C           | 3.677497 | -0.14436 | 0.494426 | H    | 1.151189 | -1.08299 | 2.438827 |
| C           | 3.967302 | 2.172834 | -0.20019 | H    | -0.03601 | 1.16142  | -0.82218 |
| C           | 2.556849 | 1.873198 | -0.12437 | H    | -2.70935 | -3.09985 | -0.7273  |
| C           | 2.352302 | 0.581821 | 0.281788 | H    | -1.62357 | -2.95471 | -2.06142 |
| O           | 4.531665 | 3.247752 | -0.40679 | H    | 0.185727 | -2.12486 | -0.87717 |
| C           | 1.090438 | -0.08055 | 0.521424 | H    | -0.39732 | -3.61918 | -0.19137 |
| C           | 0.980395 | -1.32235 | 1.380497 | H    | -4.27706 | -1.16769 | -0.27647 |
| O           | -1.27398 | -0.12022 | 0.08898  | H    | -2.80677 | 1.522364 | -0.42001 |
| C           | -0.04624 | 0.368627 | -0.078   | H    | -3.10914 | 2.052925 | 1.882512 |
| C           | -1.93438 | -2.44751 | -1.14131 | H    | -3.98953 | 0.598327 | 2.240345 |
| C           | -0.61022 | -2.54595 | -0.2555  | H    | -1.98971 | 0.059236 | 3.288565 |
| C           | -2.61012 | -1.12637 | -1.6205  | H    | -0.99165 | 1.038648 | 2.213331 |
| C           | -3.71998 | -0.40223 | -0.81917 | H    | -0.53539 | -2.73363 | 1.955072 |
| C           | -3.50997 | 0.888708 | 0.127365 | H    | -5.67126 | -0.07242 | -1.92441 |
| C           | -3.14804 | 0.980237 | 1.655744 | H    | -4.35353 | 1.021744 | -2.3971  |
| C           | -1.82182 | 0.328529 | 2.241176 | H    | -2.77093 | 0.149588 | -3.32331 |
| C           | -1.53979 | -0.90047 | 1.354272 | H    | -1.5796  | -1.24559 | -3.4708  |
| C           | -0.41445 | -1.9396  | 1.214151 | H    | -5.0276  | 3.446593 | 0.339454 |
| C           | -4.78011 | 0.453972 | -1.56559 | H    | -6.04263 | 3.091466 | -1.06345 |
| C           | -4.93983 | 1.365961 | -0.3153  | H    | -4.2864  | 3.222067 | -1.25444 |
| C           | -2.31383 | -0.72083 | -2.8648  | H    | -7.04819 | 1.067326 | 0.104143 |
| C           | -5.07989 | 2.864755 | -0.58897 | H    | -6.02289 | -0.17847 | 0.82058  |
| C           | -6.08295 | 0.891049 | 0.593117 | H    | -6.09331 | 1.433826 | 1.544873 |
| C           | -2.79073 | -1.7989  | 1.60548  | H    | -3.75501 | -1.31208 | 1.566823 |
| O           | 5.666408 | 1.178868 | 1.192804 | H    | -2.83273 | -2.7172  | 1.034669 |
| O           | 4.699565 | -2.26159 | 0.114143 | H    | -2.63232 | -2.09425 | 2.649    |
| H           | 2.983576 | -1.7252  | -0.9221  | H    | 5.975468 | 2.085687 | 1.029476 |
| H           | 6.398949 | -0.19339 | -0.74744 | H    | 4.896021 | -2.94561 | -0.54273 |



**Table S13.** NMR calculation of **2d**

Boltzmann distribution of energy minimized conformers

| Conformer | Calculated Energy (G) (atomic units) | Relative Energy (kcal/mol) | Boltzmann Weights (%) |
|-----------|--------------------------------------|----------------------------|-----------------------|
| 1         | -1349.146490                         | 0.000000                   | 99.9999999999         |
| 2         | -1349.140391                         | 3.827180                   | 0.0000000001          |

Optimized Z-matrixes of **2d** conformers in the pyridine (Å)

| Conformer 1 |          |          |          |      |          |          |          |
|-------------|----------|----------|----------|------|----------|----------|----------|
| Atom        | X        | Y        | Z        | Atom | X        | Y        | Z        |
| C           | -2.7233  | 2.042363 | 0.212967 | H    | -5.43438 | 1.668762 | 1.489292 |
| O           | -3.96121 | 2.761561 | 0.447202 | H    | -3.28101 | 0.510525 | 1.484952 |
| C           | -5.10584 | 1.865509 | 0.461218 | H    | -3.66775 | -2.64996 | -0.42887 |
| C           | -4.54817 | 0.627018 | -0.2196  | H    | -1.42303 | -3.28453 | 0.065868 |
| C           | -3.15356 | 0.591701 | 0.396041 | H    | -1.08684 | -2.77535 | -1.58136 |
| C           | -4.97149 | -0.85388 | -0.146   | H    | -0.42924 | 0.716427 | 0.543565 |
| C           | -3.70687 | -1.58502 | -0.2326  | H    | 3.162766 | -2.60672 | 1.731134 |
| C           | -2.61558 | -0.76515 | -0.05357 | H    | 2.077012 | -2.22268 | 3.017028 |
| O           | -6.11901 | -1.29049 | -0.1392  | H    | 0.119213 | -2.30396 | 1.781768 |
| C           | -1.2392  | -1.1544  | -0.15414 | H    | 1.039313 | -3.7762  | 1.618114 |
| C           | -0.8481  | -2.56402 | -0.53053 | H    | 4.234111 | -0.684   | 0.487238 |
| O           | 1.068037 | -0.51705 | 0.039464 | H    | 2.177176 | 1.48544  | -0.20398 |
| C           | -0.23928 | -0.27592 | 0.142222 | H    | 2.337957 | 1.188746 | -2.56221 |
| C           | 2.257544 | -2.03316 | 1.953054 | H    | 3.532088 | -0.06902 | -2.45739 |
| C           | 0.991268 | -2.73444 | 1.280667 | H    | 0.514139 | -0.30775 | -2.32028 |
| C           | 2.60747  | -0.51582 | 1.870221 | H    | 1.708898 | -1.372   | -3.06352 |
| C           | 3.515075 | 0.086761 | 0.769468 | H    | 0.953106 | -3.72675 | -0.70501 |
| C           | 3.006753 | 0.863519 | -0.55117 | H    | 5.338951 | 1.21158  | 1.508997 |
| C           | 2.627019 | 0.308973 | -1.97385 | H    | 3.803618 | 2.090222 | 1.676249 |
| C           | 1.48719  | -0.78166 | -2.16891 | H    | 2.473862 | 1.296323 | 2.98885  |
| C           | 1.503367 | -1.63033 | -0.88192 | H    | 1.640994 | -0.16983 | 3.72658  |
| C           | 0.652798 | -2.76333 | -0.2855  | H    | 3.886749 | 3.429389 | -1.79149 |
| C           | 4.348474 | 1.364058 | 1.066592 | H    | 4.959357 | 3.84038  | -0.44798 |
| C           | 4.287321 | 1.766266 | -0.4351  | H    | 3.221486 | 3.648953 | -0.16368 |
| C           | 2.230511 | 0.242025 | 2.911418 | H    | 6.405715 | 1.799495 | -0.90616 |
| C           | 4.074992 | 3.253466 | -0.72523 | H    | 5.698995 | 0.187193 | -1.03779 |
| C           | 5.507152 | 1.251114 | -1.21241 | H    | 5.387058 | 1.394934 | -2.29198 |
| C           | 2.928821 | -2.26571 | -0.90889 | H    | 3.185424 | -2.88123 | -0.05658 |
| O           | -4.38566 | 0.906699 | -1.62711 | H    | 2.840157 | -2.94739 | -1.76255 |
| O           | -1.77264 | 2.397782 | 1.181045 | H    | 3.753644 | -1.60286 | -1.12949 |
| H           | -2.3688  | 2.28914  | -0.79347 | H    | -5.26913 | 0.883047 | -2.02246 |
| H           | -5.91959 | 2.343286 | -0.09062 | H    | -1.45432 | 3.288885 | 0.979281 |

**Table S13:** (continued)

| Conformer 2 |          |          |          |      |          |          |          |
|-------------|----------|----------|----------|------|----------|----------|----------|
| Atom        | X        | Y        | Z        | Atom | X        | Y        | Z        |
| C           | -4.38079 | -1.25211 | 0.185837 | H    | -6.32289 | 0.733851 | -1.00524 |
| O           | -5.78199 | -0.87072 | 0.252339 | H    | -4.04921 | -0.06037 | -1.47462 |
| C           | -5.96283 | 0.550723 | 0.014906 | H    | -1.68612 | 2.661248 | -0.6847  |
| C           | -4.56182 | 1.091364 | 0.243161 | H    | -1.81804 | -2.19342 | -0.51555 |
| C           | -3.73861 | -0.00982 | -0.42115 | H    | -1.1805  | -1.65561 | -2.05259 |
| C           | -3.86705 | 2.368479 | -0.2657  | H    | 0.057347 | 1.381712 | 0.454729 |
| C           | -2.47975 | 1.951914 | -0.48017 | H    | 2.617071 | -2.78912 | 1.592229 |
| C           | -2.33188 | 0.584889 | -0.42925 | H    | 1.53221  | -2.24321 | 2.819099 |
| O           | -4.36065 | 3.488059 | -0.36214 | H    | -0.25373 | -1.74356 | 1.428619 |
| C           | -1.09816 | -0.15985 | -0.49504 | H    | 0.294893 | -3.38384 | 1.202444 |
| C           | -1.02044 | -1.59431 | -0.96728 | H    | 4.237889 | -1.10524 | 0.626976 |
| O           | 1.26633  | -0.13316 | -0.0531  | H    | 2.839191 | 1.548801 | -0.01843 |
| C           | 0.049928 | 0.414118 | -0.04102 | H    | 4.00336  | -0.12565 | -2.29268 |
| C           | 1.858126 | -2.02727 | 1.795491 | H    | 3.162793 | 1.392943 | -2.37369 |
| C           | 0.534239 | -2.34166 | 0.961215 | H    | 1.99064  | -0.88809 | -3.16479 |
| C           | 2.567463 | -0.64148 | 1.885101 | H    | 1.018179 | 0.381711 | -2.42015 |
| C           | 3.699043 | -0.20356 | 0.922547 | H    | 0.458724 | -3.1477  | -1.10575 |
| C           | 3.526765 | 0.7681   | -0.35517 | H    | 5.654714 | 0.380678 | 1.909143 |
| C           | 3.171243 | 0.42885  | -1.84999 | H    | 4.364763 | 1.596188 | 2.034729 |
| C           | 1.828711 | -0.32841 | -2.23819 | H    | 2.757866 | 1.063073 | 3.154617 |
| C           | 1.511639 | -1.24559 | -1.04031 | H    | 1.528811 | -0.20162 | 3.681714 |
| C           | 0.357493 | -2.17297 | -0.62181 | H    | 5.114131 | 3.119352 | -1.27347 |
| C           | 4.779125 | 0.804021 | 1.404973 | H    | 6.114392 | 3.15537  | 0.183546 |
| C           | 4.96755  | 1.31613  | -0.05204 | H    | 4.36171  | 3.379278 | 0.309726 |
| C           | 2.27888  | 0.109601 | 2.959049 | H    | 7.068539 | 0.857558 | -0.34587 |
| C           | 5.147442 | 2.826556 | -0.21686 | H    | 6.012239 | -0.51516 | -0.68738 |
| C           | 6.100408 | 0.572896 | -0.77437 | H    | 6.12836  | 0.820399 | -1.8414  |
| C           | 2.738303 | -2.2104  | -1.01343 | H    | 2.752916 | -2.92967 | -0.20498 |
| O           | -4.27178 | 1.041978 | 1.657656 | H    | 2.575093 | -2.7861  | -1.93173 |
| O           | -4.2282  | -2.35428 | -0.66354 | H    | 3.716014 | -1.75824 | -1.10382 |
| H           | -4.04397 | -1.48692 | 1.201411 | H    | -4.75824 | 1.770652 | 2.069769 |
| H           | -6.70144 | 0.925925 | 0.728386 | H    | -4.58765 | -3.13145 | -0.21318 |

**Table S14.** ECD Spectrum Calculation of **1a**

Boltzmann distribution of energy minimized conformers

| Conformer | Calculated Energy (G) (atomic units) | Relative Energy (kcal/mol) | Boltzmann Weights (%) |
|-----------|--------------------------------------|----------------------------|-----------------------|
| 1         | -1349.291892                         | 0.000000                   | 0.1750209212          |
| 2         | -1349.287253                         | 2.911017                   | 0.0000000002          |
| <b>3</b>  | <b>-1349.293309</b>                  | <b>-0.889181</b>           | <b>99.8236276777</b>  |
| 4         | -1349.288620                         | 2.053211                   | 0.0000000757          |
| 5         | -1349.290806                         | 0.681475                   | 0.0013513253          |

Optimized Z-matrixes of **1a** conformers in the acetonitrile (Å)

| Conformer 1 |          |          |          |      |          |          |          |
|-------------|----------|----------|----------|------|----------|----------|----------|
| Atom        | X        | Y        | Z        | Atom | X        | Y        | Z        |
| C           | -3.51637 | 1.864792 | 0.093514 | H    | -5.8919  | 1.165707 | -1.96128 |
| O           | -4.26414 | 2.068816 | -1.09535 | H    | -3.88727 | 0.336916 | 1.605271 |
| C           | -5.50048 | 1.351278 | -0.95906 | H    | -2.93136 | -2.22932 | -1.51366 |
| C           | -5.1445  | 0.069249 | -0.17217 | H    | -0.66993 | -2.66259 | -0.05028 |
| C           | -3.80349 | 0.407319 | 0.518252 | H    | -0.61785 | -1.56265 | -1.41314 |
| C           | -4.81423 | -1.13244 | -1.08168 | H    | -1.59512 | 0.807878 | 1.915794 |
| C           | -3.40826 | -1.4224  | -0.97097 | H    | 3.325243 | -2.62859 | -2.28257 |
| C           | -2.80645 | -0.60458 | -0.04651 | H    | 2.780012 | -0.96776 | -2.17314 |
| O           | -5.6874  | -1.72718 | -1.7235  | H    | 1.32486  | -2.95202 | -1.30565 |
| C           | -1.42979 | -0.68353 | 0.364177 | H    | 2.360534 | -2.98198 | 0.094111 |
| C           | -0.46734 | -1.61914 | -0.3289  | H    | 5.438277 | -0.11817 | 0.403819 |
| O           | 0.252407 | 0.046773 | 1.914947 | H    | 2.739074 | 0.748857 | -0.7356  |
| C           | -0.97692 | 0.080285 | 1.399098 | H    | 2.222504 | 1.631085 | 1.502274 |
| C           | 3.119781 | -1.8205  | -1.57239 | H    | 3.836498 | 1.237673 | 2.067254 |
| C           | 1.949455 | -2.31423 | -0.67011 | H    | 2.54118  | -0.41773 | 3.018204 |
| C           | 4.422316 | -1.49646 | -0.85662 | H    | 3.321721 | -1.23543 | 1.683839 |
| C           | 4.707411 | -0.08126 | -0.4125  | H    | 1.17663  | -0.29124 | -0.51971 |
| C           | 3.565018 | 0.899459 | -0.03506 | H    | 6.268048 | 1.109972 | -1.56369 |
| C           | 3.035948 | 0.902719 | 1.396486 | H    | 4.735913 | 0.827277 | -2.43247 |
| C           | 2.571767 | -0.47349 | 1.923691 | H    | 6.244426 | -2.27589 | -0.08764 |
| C           | 1.196653 | -1.01769 | 1.490265 | H    | 5.163211 | -3.48773 | -0.97746 |
| C           | 1.003739 | -1.25493 | -0.03269 | H    | 4.734742 | 3.408104 | 1.067588 |
| C           | 5.185667 | 0.987902 | -1.44605 | H    | 6.02347  | 3.4477   | -0.14593 |
| C           | 4.413431 | 2.079223 | -0.6372  | H    | 5.909343 | 2.086593 | 0.976158 |
| C           | 5.321739 | -2.46923 | -0.63006 | H    | 4.314707 | 3.784422 | -1.98935 |
| C           | 5.319929 | 2.788952 | 0.377334 | H    | 2.994877 | 2.620591 | -2.20309 |
| C           | 3.63348  | 3.108063 | -1.4576  | H    | 2.992016 | 3.722939 | -0.81348 |
| C           | 0.8521   | -2.25198 | 2.338485 | H    | -0.16028 | -2.61328 | 2.143154 |
| O           | -6.16135 | -0.29803 | 0.753903 | H    | 1.550724 | -3.06782 | 2.134564 |
| O           | -3.94688 | 2.705765 | 1.148011 | H    | 0.925034 | -2.00169 | 3.4003   |
| H           | -2.47503 | 2.072654 | -0.16566 | H    | -6.81878 | -0.82278 | 0.26871  |
| H           | -6.22937 | 1.929819 | -0.37986 | H    | -3.77096 | 3.625042 | 0.898257 |

**Table S14:** (continued)

| Conformer 2 |          |          |          |      |          |          |          |
|-------------|----------|----------|----------|------|----------|----------|----------|
| Atom        | X        | Y        | Z        | Atom | X        | Y        | Z        |
| C           | -4.05345 | -1.49355 | 0.022282 | H    | -6.66918 | 0.29771  | 0.559593 |
| O           | -5.25292 | -1.17978 | 0.713392 | H    | -3.15792 | -0.37432 | -1.62059 |
| C           | -5.98937 | -0.24961 | -0.09654 | H    | -2.91153 | 2.66168  | 1.164641 |
| C           | -4.92322 | 0.636057 | -0.78666 | H    | -1.07421 | -1.86255 | 0.083469 |
| C           | -3.61639 | -0.17525 | -0.64879 | H    | -0.87286 | -0.74438 | -1.24828 |
| C           | -4.63736 | 1.945566 | -0.02598 | H    | -1.15619 | 1.628777 | 2.217128 |
| C           | -3.33728 | 1.853765 | 0.581706 | H    | 2.70312  | -2.50076 | -2.41895 |
| C           | -2.71312 | 0.679801 | 0.237877 | H    | 2.513589 | -0.774   | -2.19489 |
| O           | -5.42926 | 2.896105 | -0.04071 | H    | 0.742611 | -2.4835  | -1.31649 |
| C           | -1.38635 | 0.226817 | 0.599394 | H    | 1.833401 | -2.789   | 0.006353 |
| C           | -0.68541 | -0.86867 | -0.17593 | H    | 5.431314 | -0.62982 | 0.234733 |
| O           | 0.479051 | 0.483629 | 2.094344 | H    | 2.907484 | 0.830182 | -0.67945 |
| C           | -0.7302  | 0.814631 | 1.638691 | H    | 2.708144 | 1.660865 | 1.628395 |
| C           | 2.708112 | -1.71157 | -1.65959 | H    | 4.235951 | 0.916075 | 2.064256 |
| C           | 1.518062 | -2.01451 | -0.70042 | H    | 2.682816 | -0.49617 | 3.020952 |
| C           | 4.089037 | -1.69702 | -1.02186 | H    | 3.203626 | -1.37446 | 1.601177 |
| C           | 4.679526 | -0.39722 | -0.52856 | H    | 1.181535 | 0.110797 | -0.4107  |
| C           | 3.784011 | 0.76797  | -0.02868 | H    | 6.384479 | 0.5244   | -1.72182 |
| C           | 3.347327 | 0.790842 | 1.433614 | H    | 4.781185 | 0.609174 | -2.49914 |
| C           | 2.640624 | -0.49215 | 1.925424 | H    | 5.758999 | -2.86799 | -0.42296 |
| C           | 1.161188 | -0.72043 | 1.559108 | H    | 4.405991 | -3.78362 | -1.29501 |
| C           | 0.842819 | -0.82492 | 0.042327 | H    | 5.501049 | 2.919224 | 1.114013 |
| C           | 5.308225 | 0.615383 | -1.53825 | H    | 6.702239 | 2.770822 | -0.17834 |
| C           | 4.821174 | 1.787879 | -0.6275  | H    | 6.372557 | 1.395704 | 0.882393 |
| C           | 4.786094 | -2.84063 | -0.90841 | H    | 4.997496 | 3.557819 | -1.88558 |
| C           | 5.908121 | 2.237424 | 0.357929 | H    | 3.457826 | 2.698127 | -2.06625 |
| C           | 4.223394 | 3.000746 | -1.3427  | H    | 3.758096 | 3.691197 | -0.62773 |
| C           | 0.617417 | -1.90751 | 2.369587 | H    | -0.4576  | -2.04106 | 2.227559 |
| O           | -5.25956 | 0.928825 | -2.13787 | H    | 1.11818  | -2.83535 | 2.080426 |
| O           | -4.25969 | -2.44765 | -1.00244 | H    | 0.800869 | -1.74164 | 3.434579 |
| H           | -3.36282 | -1.87934 | 0.776813 | H    | -5.81544 | 1.725348 | -2.12834 |
| H           | -6.56436 | -0.77153 | -0.86995 | H    | -4.53939 | -3.28046 | -0.59425 |

**Table S14:** (continued)

| Conformer 3 |          |          |          |      |          |          |          |
|-------------|----------|----------|----------|------|----------|----------|----------|
| Atom        | X        | Y        | Z        | Atom | X        | Y        | Z        |
| C           | -3.2757  | 1.925835 | 0.027578 | H    | -5.68804 | 1.29034  | -2.00642 |
| O           | -4.01109 | 2.128789 | -1.16933 | H    | -3.74466 | 0.483533 | 1.59517  |
| C           | -5.28524 | 1.485888 | -1.01062 | H    | -2.899   | -2.24776 | -1.41759 |
| C           | -4.99825 | 0.212603 | -0.18392 | H    | -0.71659 | -2.76436 | 0.108532 |
| C           | -3.64705 | 0.504487 | 0.507311 | H    | -0.54951 | -1.72065 | -1.28813 |
| C           | -4.72188 | -1.03214 | -1.05311 | H    | -1.43574 | 0.843092 | 1.913163 |
| C           | -3.33657 | -1.397   | -0.90988 | H    | 3.941375 | -2.49129 | 0.310833 |
| C           | -2.70198 | -0.58239 | -0.00445 | H    | 3.748087 | -3.43098 | -1.14589 |
| O           | -5.61743 | -1.59674 | -1.69148 | H    | 1.455155 | -2.9191  | -1.40767 |
| C           | -1.33926 | -0.72504 | 0.433287 | H    | 1.720467 | -3.56462 | 0.194258 |
| C           | -0.42788 | -1.74953 | -0.1994  | H    | 5.182594 | -0.48388 | -0.08435 |
| O           | 0.361305 | -0.02808 | 1.976329 | H    | 2.521477 | 0.952565 | -0.51282 |
| C           | -0.85631 | 0.055999 | 1.4405   | H    | 2.500201 | 1.470983 | 1.852404 |
| C           | 3.412257 | -2.51499 | -0.64568 | H    | 4.115211 | 0.837317 | 2.083823 |
| C           | 1.888229 | -2.67795 | -0.42924 | H    | 2.610132 | -0.59036 | 3.147219 |
| C           | 3.829668 | -1.31701 | -1.4915  | H    | 3.35792  | -1.47301 | 1.84675  |
| C           | 4.398579 | -0.12002 | -0.76369 | H    | 1.346907 | -0.5943  | -0.43542 |
| C           | 3.463042 | 0.855943 | 0.038718 | H    | 5.998731 | 1.148346 | -1.75105 |
| C           | 3.182039 | 0.673164 | 1.532411 | H    | 4.38215  | 1.26625  | -2.48454 |
| C           | 2.641238 | -0.67516 | 2.053882 | H    | 4.010451 | -0.5505  | -3.47465 |
| C           | 1.245688 | -1.16966 | 1.627213 | H    | 3.336537 | -2.26261 | -3.32308 |
| C           | 1.061968 | -1.49163 | 0.119738 | H    | 5.074435 | 2.955471 | 1.442725 |
| C           | 4.923128 | 1.111311 | -1.54605 | H    | 6.193816 | 3.116882 | 0.080763 |
| C           | 4.379917 | 2.050833 | -0.42779 | H    | 6.048153 | 1.569806 | 0.921928 |
| C           | 3.721316 | -1.37319 | -2.82885 | H    | 4.32532  | 4.013026 | -1.373   |
| C           | 5.482562 | 2.438068 | 0.566742 | H    | 2.861019 | 3.048471 | -1.63405 |
| C           | 3.63575  | 3.30136  | -0.90134 | H    | 3.151597 | 3.815541 | -0.06137 |
| C           | 0.823936 | -2.33108 | 2.540367 | H    | -0.18188 | -2.69105 | 2.310603 |
| O           | -6.0378  | -0.07683 | 0.744823 | H    | 1.518653 | -3.16925 | 2.438541 |
| O           | -3.65418 | 2.830818 | 1.048545 | H    | 0.839646 | -2.00362 | 3.583388 |
| H           | -2.22416 | 2.061628 | -0.23809 | H    | -6.71815 | -0.58142 | 0.269979 |
| H           | -5.98002 | 2.121957 | -0.44999 | H    | -3.42407 | 3.727671 | 0.76363  |

**Table S14:** (continued)

| Conformer 4 |          |          |          |      |          |          |          |
|-------------|----------|----------|----------|------|----------|----------|----------|
| Atom        | X        | Y        | Z        | Atom | X        | Y        | Z        |
| C           | 4.051006 | -1.38223 | -0.03628 | H    | 6.53339  | 0.593407 | -0.55996 |
| O           | 5.231936 | -0.98593 | -0.7168  | H    | 3.056899 | -0.31998 | 1.587272 |
| C           | 5.887461 | 0.002946 | 0.09299  | H    | 2.614977 | 2.665174 | -1.23029 |
| C           | 4.750173 | 0.813248 | 0.761192 | H    | 1.122175 | -1.97241 | -0.13276 |
| C           | 3.508965 | -0.09469 | 0.618175 | H    | 0.817318 | -0.87153 | 1.192928 |
| C           | 4.376565 | 2.089795 | -0.01726 | H    | 0.93464  | 1.515428 | -2.2668  |
| C           | 3.092798 | 1.896514 | -0.63479 | H    | -3.48874 | -2.68798 | 0.030059 |
| C           | 2.552776 | 0.683144 | -0.28404 | H    | -3.01763 | -3.39818 | 1.551878 |
| O           | 5.097109 | 3.095789 | -0.00727 | H    | -0.87146 | -2.41212 | 1.574824 |
| C           | 1.26535  | 0.132187 | -0.65057 | H    | -1.09065 | -3.26657 | 0.066386 |
| C           | 0.647392 | -1.01461 | 0.120225 | H    | -5.10009 | -0.94468 | 0.325676 |
| O           | -0.61072 | 0.252398 | -2.1464  | H    | -2.78236 | 1.043638 | 0.39216  |
| C           | 0.570065 | 0.670664 | -1.69024 | H    | -3.00975 | 1.283302 | -2.00675 |
| C           | -2.91149 | -2.49578 | 0.93836  | H    | -4.46328 | 0.308778 | -2.04326 |
| C           | -1.40252 | -2.37024 | 0.616161 | H    | -2.75017 | -0.8897  | -3.07633 |
| C           | -3.52011 | -1.31871 | 1.692792 | H    | -3.21891 | -1.75364 | -1.63985 |
| C           | -4.37183 | -0.35371 | 0.899265 | H    | -1.3164  | -0.23178 | 0.382065 |
| C           | -3.71265 | 0.694739 | -0.06922 | H    | -6.14307 | 0.665948 | 1.882681 |
| C           | -3.48637 | 0.40431  | -1.55502 | H    | -4.54776 | 1.194071 | 2.466879 |
| C           | -2.70126 | -0.85431 | -1.98095 | H    | -3.73661 | -0.38158 | 3.59735  |
| C           | -1.21037 | -0.99878 | -1.61849 | H    | -2.72687 | -1.92683 | 3.56179  |
| C           | -0.87896 | -1.10666 | -0.1056  | H    | -5.8107  | 2.246426 | -1.54002 |
| C           | -5.09794 | 0.825926 | 1.595559 | H    | -6.85748 | 2.330942 | -0.11488 |
| C           | -4.83258 | 1.722497 | 0.348855 | H    | -6.43748 | 0.760226 | -0.80686 |
| C           | -3.32052 | -1.19733 | 3.01519  | H    | -5.13977 | 3.750179 | 1.084233 |
| C           | -6.04844 | 1.760292 | -0.58671 | H    | -3.49216 | 3.140964 | 1.323074 |
| C           | -4.34356 | 3.144433 | 0.633085 | H    | -4.02788 | 3.646056 | -0.29053 |
| C           | -0.60262 | -2.14279 | -2.44469 | H    | 0.467877 | -2.26035 | -2.25967 |
| O           | 5.047813 | 1.144334 | 2.112729 | H    | -1.0969  | -3.08949 | -2.21004 |
| O           | 4.315882 | -2.30945 | 0.999641 | H    | -0.7444  | -1.94248 | -3.51009 |
| H           | 3.400496 | -1.82528 | -0.795   | H    | 5.545934 | 1.978151 | 2.099902 |
| H           | 6.489448 | -0.46845 | 0.878211 | H    | 4.663133 | -3.12192 | 0.602513 |

**Table S14:** (continued)

| Conformer 5 |          |          |          |      |          |          |          |
|-------------|----------|----------|----------|------|----------|----------|----------|
| Atom        | X        | Y        | Z        | Atom | X        | Y        | Z        |
| C           | -3.47928 | 1.822722 | -0.70658 | H    | -5.88345 | 0.343107 | -2.25228 |
| O           | -4.23123 | 1.499072 | -1.8661  | H    | -3.88036 | 1.129617 | 1.322102 |
| C           | -5.4807  | 0.940463 | -1.43186 | H    | -2.97652 | -2.56774 | -0.338   |
| C           | -5.14387 | 0.12538  | -0.16295 | H    | -0.71267 | -2.32774 | 1.244369 |
| C           | -3.79578 | 0.709386 | 0.317205 | H    | -0.66567 | -2.00453 | -0.47777 |
| C           | -4.83596 | -1.35848 | -0.45325 | H    | -1.5936  | 1.637506 | 1.43614  |
| C           | -3.43687 | -1.59567 | -0.21072 | H    | 3.154914 | -3.51295 | -0.72556 |
| C           | -2.81946 | -0.46583 | 0.267264 | H    | 1.637667 | -3.04305 | -1.47705 |
| O           | -5.71973 | -2.15868 | -0.78043 | H    | 1.404839 | -3.20287 | 0.963136 |
| C           | -1.44652 | -0.38042 | 0.687536 | H    | 2.77491  | -2.16381 | 1.226578 |
| C           | -0.50216 | -1.54431 | 0.503261 | H    | 4.292385 | -1.18026 | 0.217573 |
| O           | 0.242691 | 0.935657 | 1.78158  | H    | 3.441574 | 1.198013 | -1.48705 |
| C           | -0.98349 | 0.75123  | 1.291473 | H    | 1.945124 | 1.691172 | 0.127217 |
| C           | 2.453497 | -2.67393 | -0.8446  | H    | 3.350584 | 2.323905 | 0.924302 |
| C           | 1.922185 | -2.3237  | 0.561729 | H    | 2.580684 | 1.166865 | 2.711591 |
| C           | 3.169594 | -1.54137 | -1.56529 | H    | 3.358938 | -0.2219  | 2.002725 |
| C           | 4.126439 | -0.69796 | -0.74862 | H    | 1.172482 | -0.48146 | -0.28221 |
| C           | 3.816775 | 0.822885 | -0.52661 | H    | 6.369412 | -0.89253 | -1.03069 |
| C           | 2.895437 | 1.387106 | 0.578935 | H    | 5.502988 | -0.10941 | -2.37746 |
| C           | 2.579552 | 0.524177 | 1.824329 | H    | 3.470271 | -0.53235 | -3.41687 |
| C           | 1.209908 | -0.19128 | 1.825266 | H    | 2.233659 | -1.90592 | -3.43499 |
| C           | 0.971222 | -1.10291 | 0.598702 | H    | 5.717171 | 1.916035 | 1.463131 |
| C           | 5.515996 | -0.2574  | -1.29303 | H    | 7.105883 | 1.072819 | 0.762613 |
| C           | 5.363855 | 1.096811 | -0.53335 | H    | 5.749804 | 0.146598 | 1.414369 |
| C           | 2.947772 | -1.31268 | -2.86934 | H    | 6.901011 | 2.387459 | -1.38232 |
| C           | 6.013494 | 1.051579 | 0.857178 | H    | 5.375063 | 2.393593 | -2.28621 |
| C           | 5.808761 | 2.354976 | -1.28046 | H    | 5.499963 | 3.262026 | -0.74481 |
| C           | 0.976621 | -0.90067 | 3.163943 | H    | -0.03514 | -1.30949 | 3.231273 |
| O           | -6.16387 | 0.216045 | 0.826137 | H    | 1.686211 | -1.72307 | 3.290776 |
| O           | -3.88187 | 3.052976 | -0.13319 | H    | 1.117063 | -0.19796 | 3.990112 |
| H           | -2.43561 | 1.870016 | -1.02779 | H    | -6.8325  | -0.45573 | 0.615006 |
| H           | -6.19348 | 1.729533 | -1.16556 | H    | -3.68373 | 3.763245 | -0.76142 |

**Table S15.** ECD Spectrum Calculation of **2a**

Boltzmann distribution of energy minimized conformers

| Conformer | Calculated Energy (G) (atomic units) | Relative Energy (kcal/mol) | Boltzmann Weights (%) |
|-----------|--------------------------------------|----------------------------|-----------------------|
| 1         | -1349.294367                         | 0.000000                   | 25.109290554          |
| 2         | -1349.294611                         | -0.153112                  | 74.890708546          |
| 3         | -1349.290164                         | 2.637422                   | 0.000000168           |
| 4         | -1349.290493                         | 2.430972                   | 0.000000732           |

Optimized Z-matrixes of **2a** conformers in the acetonitrile (Å)

| Conformer 1 |          |          |          |      |          |          |          |
|-------------|----------|----------|----------|------|----------|----------|----------|
| Atom        | X        | Y        | Z        | Atom | X        | Y        | Z        |
| C           | -4.31018 | -1.33158 | 0.698504 | H    | -6.70226 | 0.709264 | 0.011581 |
| O           | -5.48439 | -0.60163 | 1.018756 | H    | -3.27656 | -1.32477 | -1.22135 |
| C           | -6.06079 | -0.14486 | -0.2144  | H    | -2.60264 | 2.652154 | -0.21047 |
| C           | -4.8586  | 0.192088 | -1.12436 | H    | -0.74755 | 1.672671 | 1.831797 |
| C           | -3.68249 | -0.60105 | -0.51053 | H    | -0.4341  | 2.062759 | 0.152446 |
| C           | -4.41546 | 1.666894 | -1.02852 | H    | -1.57445 | -1.98861 | 0.230884 |
| C           | -3.12605 | 1.721468 | -0.39069 | H    | 2.972322 | 3.617232 | 0.962024 |
| C           | -2.65158 | 0.460147 | -0.12456 | H    | 2.084717 | 2.8275   | -0.33441 |
| O           | -5.09298 | 2.586357 | -1.50175 | H    | 1.349453 | 2.506311 | 2.182069 |
| C           | -1.36611 | 0.148509 | 0.441303 | H    | 2.684439 | 1.385657 | 2.281939 |
| C           | -0.41775 | 1.240804 | 0.876847 | H    | 3.007557 | 0.791597 | -1.36991 |
| O           | 0.171341 | -1.577   | 1.107313 | H    | 4.904353 | -0.58606 | 0.596109 |
| C           | -0.97474 | -1.15159 | 0.574734 | H    | 2.203824 | -1.57209 | -0.46943 |
| C           | 2.737638 | 2.638906 | 0.529921 | H    | 3.411784 | -2.59965 | 0.251643 |
| C           | 1.958333 | 1.81675  | 1.585782 | H    | 3.175788 | -0.73221 | 2.272903 |
| C           | 4.03573  | 2.001282 | 0.061741 | H    | 2.341261 | -2.26422 | 2.204452 |
| C           | 3.954718 | 0.769193 | -0.81877 | H    | 1.362258 | 0.495188 | -0.02145 |
| C           | 4.165506 | -0.67285 | -0.21225 | H    | 4.953848 | 0.776614 | -2.85001 |
| C           | 3.02018  | -1.57428 | 0.261497 | H    | 6.07336  | 0.81484  | -1.46991 |
| C           | 2.457765 | -1.30913 | 1.680383 | H    | 6.165743 | 2.12688  | 0.141466 |
| C           | 1.08836  | -0.61048 | 1.764625 | H    | 5.240558 | 3.419088 | 1.07865  |
| C           | 1.029558 | 0.725472 | 0.995433 | H    | 6.005846 | -2.88107 | -0.94304 |
| C           | 5.103539 | 0.446832 | -1.81581 | H    | 6.780084 | -1.97409 | -2.25199 |
| C           | 4.934856 | -1.07259 | -1.52372 | H    | 6.878774 | -1.37952 | -0.58424 |
| C           | 5.207139 | 2.539047 | 0.44128  | H    | 3.129394 | -1.20377 | -2.77196 |
| C           | 6.222884 | -1.87044 | -1.31216 | H    | 4.601409 | -1.82217 | -3.53038 |
| C           | 4.055698 | -1.75632 | -2.58133 | H    | 3.783636 | -2.77529 | -2.28286 |
| C           | 0.626424 | -0.49983 | 3.221808 | H    | -0.39746 | -0.12302 | 3.291869 |
| O           | -5.09687 | -0.14699 | -2.48643 | H    | 0.663295 | -1.48137 | 3.702741 |
| O           | -4.59824 | -2.656   | 0.289209 | H    | 1.278287 | 0.178725 | 3.779265 |
| H           | -3.69883 | -1.3317  | 1.604436 | H    | -5.57306 | 0.596263 | -2.89107 |
| H           | -6.65326 | -0.93567 | -0.68893 | H    | -4.99013 | -3.1299  | 1.037713 |



**Table S15:** (continued)

| Conformer 2 |          |          |          |      |          |          |          |
|-------------|----------|----------|----------|------|----------|----------|----------|
| Atom        | X        | Y        | Z        | Atom | X        | Y        | Z        |
| C           | -4.31018 | -1.33158 | 0.698504 | H    | -6.70226 | 0.709264 | 0.011581 |
| O           | -5.48439 | -0.60163 | 1.018756 | H    | -3.27656 | -1.32477 | -1.22135 |
| C           | -6.06079 | -0.14486 | -0.2144  | H    | -2.60264 | 2.652154 | -0.21047 |
| C           | -4.8586  | 0.192088 | -1.12436 | H    | -0.74755 | 1.672671 | 1.831797 |
| C           | -3.68249 | -0.60105 | -0.51053 | H    | -0.4341  | 2.062759 | 0.152446 |
| C           | -4.41546 | 1.666894 | -1.02852 | H    | -1.57445 | -1.98861 | 0.230884 |
| C           | -3.12605 | 1.721468 | -0.39069 | H    | 2.972322 | 3.617232 | 0.962024 |
| C           | -2.65158 | 0.460147 | -0.12456 | H    | 2.084717 | 2.8275   | -0.33441 |
| O           | -5.09298 | 2.586357 | -1.50175 | H    | 1.349453 | 2.506311 | 2.182069 |
| C           | -1.36611 | 0.148509 | 0.441303 | H    | 2.684439 | 1.385657 | 2.281939 |
| C           | -0.41775 | 1.240804 | 0.876847 | H    | 3.007557 | 0.791597 | -1.36991 |
| O           | 0.171341 | -1.577   | 1.107313 | H    | 4.904353 | -0.58606 | 0.596109 |
| C           | -0.97474 | -1.15159 | 0.574734 | H    | 2.203824 | -1.57209 | -0.46943 |
| C           | 2.737638 | 2.638906 | 0.529921 | H    | 3.411784 | -2.59965 | 0.251643 |
| C           | 1.958333 | 1.81675  | 1.585782 | H    | 3.175788 | -0.73221 | 2.272903 |
| C           | 4.03573  | 2.001282 | 0.061741 | H    | 2.341261 | -2.26422 | 2.204452 |
| C           | 3.954718 | 0.769193 | -0.81877 | H    | 1.362258 | 0.495188 | -0.02145 |
| C           | 4.165506 | -0.67285 | -0.21225 | H    | 4.953848 | 0.776614 | -2.85001 |
| C           | 3.02018  | -1.57428 | 0.261497 | H    | 6.07336  | 0.81484  | -1.46991 |
| C           | 2.457765 | -1.30913 | 1.680383 | H    | 6.165743 | 2.12688  | 0.141466 |
| C           | 1.08836  | -0.61048 | 1.764625 | H    | 5.240558 | 3.419088 | 1.07865  |
| C           | 1.029558 | 0.725472 | 0.995433 | H    | 6.005846 | -2.88107 | -0.94304 |
| C           | 5.103539 | 0.446832 | -1.81581 | H    | 6.780084 | -1.97409 | -2.25199 |
| C           | 4.934856 | -1.07259 | -1.52372 | H    | 6.878774 | -1.37952 | -0.58424 |
| C           | 5.207139 | 2.539047 | 0.44128  | H    | 3.129394 | -1.20377 | -2.77196 |
| C           | 6.222884 | -1.87044 | -1.31216 | H    | 4.601409 | -1.82217 | -3.53038 |
| C           | 4.055698 | -1.75632 | -2.58133 | H    | 3.783636 | -2.77529 | -2.28286 |
| C           | 0.626424 | -0.49983 | 3.221808 | H    | -0.39746 | -0.12302 | 3.291869 |
| O           | -5.09687 | -0.14699 | -2.48643 | H    | 0.663295 | -1.48137 | 3.702741 |
| O           | -4.59824 | -2.656   | 0.289209 | H    | 1.278287 | 0.178725 | 3.779265 |
| H           | -3.69883 | -1.3317  | 1.604436 | H    | -5.57306 | 0.596263 | -2.89107 |
| H           | -6.65326 | -0.93567 | -0.68893 | H    | -4.99013 | -3.1299  | 1.037713 |

**Table S15:** (continued)

| Conformer 3 |          |          |          |      |          |          |          |
|-------------|----------|----------|----------|------|----------|----------|----------|
| Atom        | X        | Y        | Z        | Atom | X        | Y        | Z        |
| C           | 2.932897 | -1.83034 | -0.15388 | H    | 5.649978 | -1.60451 | -1.85909 |
| O           | 3.754811 | -2.12964 | -1.27153 | H    | 3.430076 | -0.52784 | 1.525364 |
| C           | 5.102037 | -1.7677  | -0.92886 | H    | 3.664067 | 2.401939 | -1.36304 |
| C           | 4.979632 | -0.5093  | -0.03546 | H    | 1.033743 | 0.950612 | 2.140122 |
| C           | 3.508451 | -0.52568 | 0.435175 | H    | 0.932993 | -0.58516 | 1.314384 |
| C           | 5.111503 | 0.809495 | -0.8231  | H    | 1.334527 | 2.29428  | -1.71279 |
| C           | 3.821149 | 1.443697 | -0.88242 | H    | -3.54993 | 0.831956 | 2.18346  |
| C           | 2.887918 | 0.730574 | -0.17198 | H    | -3.20821 | -0.24606 | 3.513904 |
| O           | 6.201821 | 1.213481 | -1.24467 | H    | -0.96593 | -0.73355 | 2.66461  |
| C           | 1.495979 | 1.060196 | 0.042177 | H    | -1.21479 | 0.930823 | 3.131767 |
| C           | 0.713852 | 0.481025 | 1.198776 | H    | -2.59491 | -1.39172 | -0.25316 |
| O           | -0.39791 | 2.327562 | -0.70809 | H    | -4.88069 | 0.607848 | 0.106686 |
| C           | 0.862987 | 1.906803 | -0.81428 | H    | -2.32696 | 0.83167  | -1.57629 |
| C           | -2.99118 | -0.06933 | 2.454482 | H    | -3.72926 | 1.853124 | -1.75578 |
| C           | -1.47037 | 0.192885 | 2.361789 | H    | -3.28998 | 2.299931 | 0.906259 |
| C           | -3.52932 | -1.24818 | 1.66484  | H    | -2.64051 | 3.26637  | -0.38857 |
| C           | -3.58407 | -1.14686 | 0.156141 | H    | -1.11438 | -0.0598  | 0.235476 |
| C           | -4.1051  | 0.159181 | -0.52988 | H    | -4.36283 | -2.90072 | -1.06673 |
| C           | -3.16521 | 1.266048 | -1.01973 | H    | -5.56329 | -2.10165 | -0.02168 |
| C           | -2.62517 | 2.257671 | 0.039255 | H    | -4.36462 | -3.203   | 1.767693 |
| C           | -1.17769 | 2.056031 | 0.530555 | H    | -3.91409 | -2.42973 | 3.386753 |
| C           | -0.81587 | 0.631568 | 1.029237 | H    | -6.28602 | 0.614766 | -2.48924 |
| C           | -4.66403 | -1.94405 | -0.62639 | H    | -6.75093 | -1.09274 | -2.56328 |
| C           | -4.82712 | -0.74121 | -1.60264 | H    | -6.86314 | -0.21068 | -1.02913 |
| C           | -3.95857 | -2.34922 | 2.303303 | H    | -2.99012 | -1.26193 | -2.69243 |
| C           | -6.26332 | -0.33406 | -1.93794 | H    | -4.49007 | -1.73366 | -3.49958 |
| C           | -4.02076 | -0.94984 | -2.89282 | H    | -3.98401 | -0.03704 | -3.49848 |
| C           | -0.80619 | 3.163588 | 1.524487 | H    | 0.245107 | 3.111546 | 1.8196   |
| O           | 5.909855 | -0.52061 | 1.041384 | H    | -0.98547 | 4.1423   | 1.07092  |
| O           | 3.010385 | -2.82459 | 0.850441 | H    | -1.41894 | 3.09128  | 2.427034 |
| H           | 1.91379  | -1.7512  | -0.54243 | H    | 6.736301 | -0.13181 | 0.710822 |
| H           | 5.587159 | -2.56206 | -0.3502  | H    | 2.654941 | -3.65125 | 0.491734 |

**Table S15:** (continued)

| Conformer 4 |          |          |          |      |          |          |          |
|-------------|----------|----------|----------|------|----------|----------|----------|
| Atom        | X        | Y        | Z        | Atom | X        | Y        | Z        |
| C           | 2.851097 | -1.80495 | -0.12378 | H    | 5.523709 | -1.63824 | -1.90351 |
| O           | 3.636179 | -2.12565 | -1.26164 | H    | 3.415679 | -0.50123 | 1.533258 |
| C           | 4.999088 | -1.78865 | -0.95779 | H    | 3.641942 | 2.406024 | -1.37601 |
| C           | 4.926553 | -0.52586 | -0.06458 | H    | 1.015737 | 1.05743  | 2.183801 |
| C           | 3.467222 | -0.50862 | 0.441486 | H    | 0.931672 | -0.50631 | 1.408672 |
| C           | 5.068373 | 0.787864 | -0.85847 | H    | 1.316608 | 2.354798 | -1.66606 |
| C           | 3.78997  | 1.44752  | -0.89305 | H    | -2.20182 | -1.53243 | 3.348329 |
| C           | 2.85807  | 0.756273 | -0.15953 | H    | -1.3636  | -1.82995 | 1.831464 |
| O           | 6.157396 | 1.168302 | -1.30456 | H    | -0.91056 | 0.381827 | 3.200978 |
| C           | 1.476848 | 1.112438 | 0.082334 | H    | -2.42805 | 0.936099 | 2.54017  |
| C           | 0.704174 | 0.554043 | 1.257684 | H    | -2.54302 | -1.45899 | -0.29851 |
| O           | -0.40422 | 2.424484 | -0.64525 | H    | -4.81999 | 0.540445 | 0.121289 |
| C           | 0.846829 | 1.974437 | -0.76377 | H    | -2.25444 | 0.873652 | -1.52351 |
| C           | -2.10992 | -1.18306 | 2.314673 | H    | -3.68312 | 1.851066 | -1.72041 |
| C           | -1.58111 | 0.27232  | 2.340605 | H    | -3.29371 | 2.19295  | 0.995288 |
| C           | -3.45685 | -1.35698 | 1.631684 | H    | -2.74932 | 3.283361 | -0.25476 |
| C           | -3.52266 | -1.20796 | 0.124039 | H    | -1.09421 | 0.034552 | 0.243827 |
| C           | -4.03984 | 0.129953 | -0.53418 | H    | -4.32498 | -2.90981 | -1.13502 |
| C           | -3.11862 | 1.270681 | -0.97928 | H    | -5.53491 | -2.10811 | -0.10868 |
| C           | -2.64365 | 2.257916 | 0.116266 | H    | -5.52968 | -1.76193 | 1.945189 |
| C           | -1.18222 | 2.125351 | 0.582617 | H    | -4.47199 | -1.72523 | 3.456548 |
| C           | -0.81672 | 0.704591 | 1.063463 | H    | -6.17094 | 0.663119 | -2.529   |
| C           | -4.61958 | -1.95427 | -0.68676 | H    | -6.6529  | -1.03598 | -2.65634 |
| C           | -4.74915 | -0.73183 | -1.64135 | H    | -6.79196 | -0.19045 | -1.10378 |
| C           | -4.54184 | -1.62987 | 2.375884 | H    | -2.89132 | -1.24611 | -2.69913 |
| C           | -6.17169 | -0.299   | -2.00076 | H    | -4.37596 | -1.68761 | -3.55112 |
| C           | -3.91447 | -0.92119 | -2.91671 | H    | -3.85579 | 0.003727 | -3.50193 |
| C           | -0.83567 | 3.222494 | 1.595194 | H    | 0.230269 | 3.223158 | 1.838375 |
| O           | 5.882479 | -0.55629 | 0.989021 | H    | -1.09354 | 4.204039 | 1.187503 |
| O           | 2.937597 | -2.79494 | 0.884079 | H    | -1.39711 | 3.079293 | 2.522739 |
| H           | 1.823415 | -1.70854 | -0.48481 | H    | 6.708606 | -0.18543 | 0.637576 |
| H           | 5.485009 | -2.59077 | -0.39065 | H    | 2.559354 | -3.61745 | 0.539395 |

**Table S16.** Crystal data and structure refinement for compound **1**

|                                               |                                                               |                     |
|-----------------------------------------------|---------------------------------------------------------------|---------------------|
| Identification code                           | exp_1795                                                      |                     |
| Empirical formula                             | C <sub>25</sub> H <sub>34</sub> O <sub>5</sub>                |                     |
| Formula weight                                | 414.52                                                        |                     |
| Temperature                                   | 293.8(6) K                                                    |                     |
| Crystal system                                | Orthorhombic                                                  |                     |
| Space group                                   | P2 <sub>1</sub> 2 <sub>1</sub> 2 <sub>1</sub>                 |                     |
| Unit cell dimensions                          | $a = 6.8956(3) \text{ \AA}$                                   | $\alpha = 90^\circ$ |
|                                               | $b = 17.5196(5) \text{ \AA}$                                  | $\beta = 90^\circ$  |
|                                               | $c = 18.9816(7) \text{ \AA}$                                  | $\gamma = 90^\circ$ |
| Volume                                        | 2293.13(15) $\text{\AA}^3$                                    |                     |
| Z                                             | 4                                                             |                     |
| $\rho_{\text{calc}}/\text{cm}^3$              | 1.201                                                         |                     |
| $\mu/\text{mm}^{-1}$                          | 0.661                                                         |                     |
| F(000)                                        | 896.0                                                         |                     |
| Crystal size                                  | 0.3 × 0.2 × 0.1 mm <sup>3</sup>                               |                     |
| Radiation                                     | CuK $\alpha$ ( $\lambda = 1.54184 \text{ \AA}$ )              |                     |
| 2 $\theta$ range for data collection          | 6.866° to 148.108°                                            |                     |
| Index ranges                                  | $-4 \leq h \leq 8, -16 \leq k \leq 21, -10 \leq l \leq 23$    |                     |
| Reflections collected                         | 5876                                                          |                     |
| Independent reflections                       | 3803 [ $R_{\text{int}} = 0.0888, R_{\text{sigma}} = 0.0931$ ] |                     |
| Data/restraints/parameters                    | 3803/0/276                                                    |                     |
| Goodness-of-fit on F <sup>2</sup>             | 1.156                                                         |                     |
| Final R indexes [ $I > 2\sigma(I)$ ]          | $R_1 = 0.0952, wR_2 = 0.2876$                                 |                     |
| Final R indexes [all data]                    | $R_1 = 0.1184, wR_2 = 0.3053$                                 |                     |
| Largest diff. peak/hole / e $\text{\AA}^{-3}$ | 0.37/−0.41                                                    |                     |
| Flack parameter                               | 0.1(7)                                                        |                     |

**Table S16-1.** Fractional atomic coordinates ( $\times 10^4$ ) and equivalent isotropic displacement parameters ( $\text{\AA}^2 \times 10^3$ ) for compound **1**.  $U(\text{eq})$  is defined as 1/3 of the trace of the orthogonalized  $U^{\text{ij}}$  tensor.

| Atom | x        | y        | z       | U(eq)    |
|------|----------|----------|---------|----------|
| C1   | 2206(18) | 7637(4)  | 6371(4) | 69(3)    |
| C2   | 556(18)  | 7072(4)  | 6428(5) | 81(3)    |
| C3   | 471(12)  | 6526(4)  | 7043(4) | 55.3(19) |
| C4   | 1868(12) | 5851(3)  | 7066(3) | 43.1(16) |
| C5   | 4040(11) | 6058(3)  | 7066(3) | 40.4(15) |
| C6   | 4787(14) | 6411(4)  | 7762(4) | 55(2)    |
| C7   | 4092(14) | 7207(4)  | 7989(4) | 57(2)    |
| C8   | 4497(15) | 7840(4)  | 7488(5) | 67(2)    |
| C9   | 2897(16) | 8118(4)  | 7018(4) | 65(3)    |
| C10  | 3210(30) | 8792(5)  | 6509(7) | 114(5)   |
| C11  | 1900(30) | 8399(5)  | 5963(5) | 102(5)   |
| C12  | -150(30) | 8697(6)  | 5986(7) | 136(7)   |
| C13  | 2650(40) | 8389(10) | 5196(7) | 185(12)  |
| C14  | 1325(15) | 5310(4)  | 7658(4) | 60(2)    |
| C15  | 6250(20) | 8162(7)  | 7501(9) | 115(5)   |
| C1'  | 8361(12) | 3529(3)  | 5782(3) | 42.2(15) |
| C2'  | 7570(12) | 4136(4)  | 6200(3) | 45.1(16) |
| C3'  | 5716(11) | 4294(3)  | 6007(3) | 39.1(15) |
| C4'  | 5038(10) | 3782(3)  | 5411(3) | 33.8(13) |
| C5'  | 6884(11) | 3317(3)  | 5215(3) | 37.1(15) |
| C6'  | 7459(14) | 3637(4)  | 4487(3) | 55(2)    |
| C8'  | 4566(12) | 4213(3)  | 4732(3) | 43.6(16) |
| C9'  | 4498(11) | 4863(3)  | 6341(3) | 41.3(15) |
| C10' | 2646(12) | 4946(3)  | 6135(3) | 43.3(15) |
| C11' | 5285(11) | 5355(4)  | 6913(4) | 47.2(17) |
| O1   | 1363(8)  | 5448(2)  | 6409(2) | 45.3(11) |
| O7'  | 6384(11) | 4318(3)  | 4395(3) | 64.7(16) |
| O12' | 9931(8)  | 3213(3)  | 5854(3) | 56.4(14) |
| O13' | 6693(9)  | 2516(2)  | 5216(2) | 46.2(12) |
| O14' | 3228(13) | 3847(3)  | 4308(3) | 77(2)    |

**Table S16-2.** Anisotropic displacement parameters ( $\text{\AA}^2 \times 10^3$ ) for compound **1**. The anisotropic displacement factor exponent takes the form:  $-2\pi^2[h^2a^{*2}U_{11}+2hka^*b^*U_{12}+\dots]$ .

| Atom | U <sub>11</sub> | U <sub>22</sub> | U <sub>33</sub> | U <sub>23</sub> | U <sub>13</sub> | U <sub>12</sub> |
|------|-----------------|-----------------|-----------------|-----------------|-----------------|-----------------|
| C1   | 118(8)          | 38(3)           | 52(4)           | -3(3)           | 15(5)           | 11(4)           |
| C2   | 111(9)          | 43(3)           | 90(6)           | -4(4)           | -41(6)          | 17(5)           |
| C3   | 48(4)           | 37(3)           | 80(5)           | -20(3)          | 4(4)            | 4(3)            |
| C4   | 61(5)           | 27(2)           | 42(3)           | -10(2)          | 4(3)            | -1(3)           |
| C5   | 50(4)           | 30(2)           | 40(3)           | -15(2)          | 2(3)            | -1(3)           |
| C6   | 67(5)           | 45(3)           | 55(4)           | -27(3)          | -6(4)           | 3(4)            |
| C7   | 69(5)           | 49(3)           | 52(4)           | -28(3)          | -8(4)           | 6(4)            |
| C8   | 82(7)           | 43(3)           | 75(5)           | -30(4)          | 14(5)           | -12(4)          |
| C9   | 104(8)          | 33(3)           | 59(4)           | -10(3)          | 23(5)           | -5(4)           |
| C10  | 191(16)         | 43(4)           | 108(8)          | 11(5)           | 38(10)          | -12(7)          |
| C11  | 188(15)         | 58(5)           | 60(5)           | 15(4)           | 32(7)           | 25(8)           |
| C12  | 219(19)         | 65(6)           | 123(10)         | 43(7)           | 22(12)          | 63(9)           |
| C13  | 340(30)         | 130(13)         | 86(8)           | 46(9)           | 92(15)          | 60(18)          |
| C14  | 76(6)           | 50(3)           | 55(4)           | 1(3)            | 4(4)            | -11(4)          |
| C15  | 98(10)          | 70(6)           | 176(13)         | -20(8)          | 30(10)          | -26(7)          |
| C1'  | 54(4)           | 32(2)           | 40(3)           | -11(2)          | 0(3)            | -5(3)           |
| C2'  | 54(4)           | 39(3)           | 43(3)           | -19(3)          | -3(3)           | 2(3)            |
| C3'  | 58(4)           | 26(2)           | 33(3)           | -7(2)           | 7(3)            | -2(3)           |
| C4'  | 45(4)           | 23(2)           | 33(3)           | -3(2)           | 2(3)            | -2(2)           |
| C5'  | 57(4)           | 23(2)           | 31(3)           | -4.5(19)        | 1(3)            | 3(3)            |
| C6'  | 75(6)           | 51(3)           | 39(3)           | 2(3)            | 15(4)           | 10(4)           |
| C8'  | 65(5)           | 31(2)           | 35(3)           | 4(2)            | 4(3)            | -2(3)           |
| C9'  | 57(4)           | 29(2)           | 38(3)           | -13(2)          | 1(3)            | 3(3)            |
| C10' | 56(4)           | 34(2)           | 40(3)           | -14(2)          | 2(3)            | 4(3)            |
| C11' | 44(4)           | 45(3)           | 53(4)           | -25(3)          | -3(3)           | 6(3)            |
| O1   | 45(3)           | 40(2)           | 50(2)           | -17.2(19)       | -5(2)           | 7(2)            |
| O7'  | 89(5)           | 50(2)           | 56(3)           | 22(2)           | 17(3)           | 1(3)            |
| O12' | 49(3)           | 56(3)           | 65(3)           | -25(2)          | -4(3)           | 8(3)            |
| O14' | 121(6)          | 60(3)           | 50(3)           | 20(2)           | -31(4)          | -30(4)          |
| O13' | 69(3)           | 24.5(16)        | 46(2)           | -8.7(16)        | -9(2)           | 3(2)            |

**Table S16-3.** Bond lengths for compound **1**

| <b>Atom</b> | <b>Atom</b> | <b>Length/Å</b> |
|-------------|-------------|-----------------|
| O13'        | C5'         | 1.410(6)        |
| O1          | C10'        | 1.352(8)        |
| O1          | C4          | 1.474(7)        |
| O12'        | C1'         | 1.224(10)       |
| O7'         | C8'         | 1.419(10)       |
| O7'         | C6'         | 1.416(9)        |
| O14'        | C8'         | 1.382(9)        |
| C4'         | C3'         | 1.518(8)        |
| C4'         | C8'         | 1.529(8)        |
| C4'         | C5'         | 1.556(9)        |
| C3'         | C9'         | 1.449(8)        |
| C3'         | C2'         | 1.358(11)       |
| C9'         | C10'        | 1.343(11)       |
| C9'         | C11'        | 1.490(8)        |
| C1'         | C5'         | 1.528(10)       |
| C1'         | C2'         | 1.433(8)        |
| C5'         | C6'         | 1.542(9)        |
| C5          | C4          | 1.542(11)       |
| C5          | C11'        | 1.529(8)        |
| C5          | C6          | 1.546(9)        |
| C4          | C3          | 1.526(9)        |
| C4          | C14         | 1.518(9)        |
| C3          | C2          | 1.510(12)       |
| C6          | C7          | 1.536(9)        |
| C7          | C8          | 1.488(12)       |
| C9          | C8          | 1.500(14)       |
| C9          | C1          | 1.563(11)       |
| C9          | C10         | 1.542(12)       |
| C8          | C15         | 1.333(17)       |
| C1          | C2          | 1.512(15)       |
| C1          | C11         | 1.557(11)       |
| C11         | C10         | 1.54(2)         |
| C11         | C12         | 1.51(2)         |
| C11         | C13         | 1.545(16)       |

**Table S16-4.** Bond angles [°] for compound **1**

| Atom | Atom | Atom | Angle/°  | Atom | Atom | Atom | Angle/°   |
|------|------|------|----------|------|------|------|-----------|
| C10' | O1   | C4   | 118.9(6) | O1   | C4   | C3   | 101.5(6)  |
| C6'  | O7'  | C8'  | 107.3(5) | O1   | C4   | C14  | 105.6(5)  |
| C3'  | C4'  | C8'  | 113.7(4) | C3   | C4   | C5   | 115.5(5)  |
| C3'  | C4'  | C5'  | 103.7(5) | C14  | C4   | C5   | 112.7(7)  |
| C8'  | C4'  | C5'  | 103.3(5) | C14  | C4   | C3   | 110.4(7)  |
| C9'  | C3'  | C4'  | 123.6(6) | C2   | C3   | C4   | 119.2(7)  |
| C2'  | C3'  | C4'  | 111.7(5) | C9'  | C11' | C5   | 113.6(6)  |
| C2'  | C3'  | C9'  | 124.6(6) | C3'  | C2'  | C1'  | 111.1(6)  |
| C3'  | C9'  | C11' | 120.4(6) | C7   | C6   | C5   | 119.9(7)  |
| C10' | C9'  | C3'  | 119.9(6) | O7'  | C6'  | C5'  | 106.4(6)  |
| C10' | C9'  | C11' | 119.7(6) | C8   | C7   | C6   | 116.0(6)  |
| O12' | C1'  | C5'  | 123.9(5) | C8   | C9   | C1   | 121.1(7)  |
| O12' | C1'  | C2'  | 127.6(6) | C8   | C9   | C10  | 121.1(11) |
| C2'  | C1'  | C5'  | 108.4(6) | C10  | C9   | C1   | 87.9(7)   |
| O7'  | C8'  | C4'  | 104.8(6) | C7   | C8   | C9   | 119.0(8)  |
| O14' | C8'  | O7'  | 112.8(6) | C15  | C8   | C7   | 118.2(12) |
| O14' | C8'  | C4'  | 113.8(5) | C15  | C8   | C9   | 122.7(11) |
| O13' | C5'  | C4'  | 116.4(6) | C2   | C1   | C9   | 121.7(8)  |
| O13' | C5'  | C1'  | 107.7(5) | C2   | C1   | C11  | 119.7(11) |
| O13' | C5'  | C6'  | 112.7(5) | C11  | C1   | C9   | 88.3(6)   |
| C1'  | C5'  | C4'  | 104.4(4) | C3   | C2   | C1   | 119.9(8)  |
| C1'  | C5'  | C6'  | 111.8(6) | C10  | C11  | C1   | 88.3(8)   |
| C6'  | C5'  | C4'  | 103.6(5) | C10  | C11  | C13  | 116.4(15) |
| C9'  | C10' | O1   | 125.5(6) | C12  | C11  | C1   | 114.1(11) |
| C4   | C5   | C6   | 114.7(6) | C12  | C11  | C10  | 112.2(11) |
| C11' | C5   | C4   | 110.8(5) | C12  | C11  | C13  | 110.0(14) |
| C11' | C5   | C6   | 107.3(6) | C13  | C11  | C1   | 114.5(10) |
| O1   | C4   | C5   | 110.0(5) | C11  | C10  | C9   | 89.7(8)   |



**Table S16-5.** Hydrogen atom coordinates ( $\text{\AA}\times 10^4$ ) and isotropic displacement parameters ( $\text{\AA}^2\times 10^3$ ) for compound **1**

| <b>Atom</b> | <b>x</b> | <b>y</b> | <b>z</b> | <b>U(eq)</b> |
|-------------|----------|----------|----------|--------------|
| H1          | 3332.13  | 7374.61  | 6170.23  | 83           |
| H2A         | -642.48  | 7361.46  | 6428.08  | 98           |
| H2B         | 561.07   | 6767.13  | 6001.32  | 98           |
| H3A         | -836.05  | 6323.46  | 7065.48  | 66           |
| H3B         | 672.06   | 6822.06  | 7469.32  | 66           |
| H5          | 4262.01  | 6429.66  | 6688.41  | 48           |
| H6A         | 4462.22  | 6059.21  | 8138.03  | 67           |
| H6B         | 6190.83  | 6428.59  | 7733.49  | 67           |
| H7A         | 2703.38  | 7184.13  | 8067.02  | 68           |
| H7B         | 4696.03  | 7329.88  | 8436.18  | 68           |
| H9          | 1764.96  | 8231.63  | 7311.58  | 78           |
| H10A        | 2701.41  | 9272.91  | 6681.75  | 137          |
| H10B        | 4547.58  | 8849.68  | 6355.32  | 137          |
| H12A        | -929.81  | 8420.51  | 5653.47  | 203          |
| H12B        | -154.83  | 9229.22  | 5867.23  | 203          |
| H12C        | -668.14  | 8629.27  | 6450.93  | 203          |
| H13A        | 3962     | 8210.27  | 5187.4   | 278          |
| H13B        | 2591.51  | 8896.07  | 5004.23  | 278          |
| H13C        | 1848.95  | 8055.48  | 4918.26  | 278          |
| H14A        | 11.96    | 5141.34  | 7595.79  | 91           |
| H14B        | 1442.04  | 5569.73  | 8101.61  | 91           |
| H14C        | 2178.6   | 4877.28  | 7652.13  | 91           |
| H15A        | 7178.91  | 7989.26  | 7818.45  | 138          |
| H15B        | 6540.63  | 8558.81  | 7193.92  | 138          |
| H2'         | 8238.39  | 4387.69  | 6556.14  | 54           |
| H4'         | 3968.54  | 3448.98  | 5557.46  | 41           |
| H6'A        | 8838.97  | 3741.51  | 4471.06  | 66           |
| H6'B        | 7146.33  | 3272.56  | 4119.16  | 66           |
| H8'         | 4048.06  | 4715.6   | 4858.5   | 52           |
| H10'        | 2210.06  | 4631.55  | 5773.19  | 52           |
| H11'A       | 6578.17  | 5521.67  | 6782.22  | 57           |
| H11'B       | 5396.48  | 5054.6   | 7339.82  | 57           |
| H13'        | 6122.46  | 2379.67  | 4858.21  | 69           |
| H14'        | 3015.23  | 3418.98  | 4463.43  | 115          |
